# Supplementary material
Source: publisher figshare collection journal article supplement (https://gsajournals.figshare.com/ndownloader/files/21191820)
Supplement: Supplementary file 1 [file 21191820]

## Sheet: lin-29 OE sig genes (fold)
WormBase Gene ID	public name	Sequence Name	log2(FoldChange)	pvalue	fold change	Uniprot ID	RefSeq_protein	Protein names	Gene ontology (biological process)	Gene ontology (molecular function)		RNAi Phenotype Observed	Allele Phenotype Observed	Expr_pattern Tissue	Genomic Study Tissue	Description Text
WBGene00000626	col-49	K09H9.3	5.58835	5.84001e-179	48.1127	O44989	NP_491106.1	COLlagen		structural constituent of cuticle [GO:0042302]		transgene expression reduced	N.A.	hyp7 syncytium, seam cell	amphid sheath cell	col-49 encodes a cuticle collagen.
WBGene00000615	col-38	F54C9.4	4.39628	9.39575e-55	21.0578	Q20754	NP_495810.1	COLlagen		structural constituent of cuticle [GO:0042302]		dumpy	N.A.	hyp7 syncytium, seam cell	AFD, amphid sheath cell, germ line, hypodermis, intestine	col-38 encodes a member of the collagen superfamily containing collagen triple helix repeats (20 copies) required for normal body morphology.
WBGene00000930	dao-4	ZC373.6	4.34431	6.51456e-90	20.3127	Q23262	NP_509691.1	Dauer or Aging adult Overexpression				N.A.	N.A.	hyp7 syncytium, seam cell	amphid sheath cell, hypodermis	dao-4 encodes a novel protein, conserved amongst nematodes; dao-4 transcripts are expressed at higher levels in wild-type adult animals than in daf-2 mutant adults at 25C, suggesting that dao-4 expression is positively regulated by DAF-2/insulin-like receptor signaling; reduced dao-4 expression in daf-2 mutants is dependent upon DAF-16.
WBGene00000698	col-124	C24F3.6	4.04166	2.53216e-47	16.4688	Q9NAR3	NP_501867.1	COLlagen		structural constituent of cuticle [GO:0042302]		N.A.	N.A.	N.A.	germ line, Z1, Z4	col-124 is an ortholog of human SFTPD (surfactant protein D); col-124 is a structural constituent of cuticle, based on protein domain information.
WBGene00000713	col-140	F26F12.1	3.97837	1.52311e-45	15.7619	Q19813	NP_504525.1	COLlagen		structural constituent of cuticle [GO:0042302]		N.A.	N.A.	N.A.	cephalic sheath cell, hypodermis, NSM	col-140 is an ortholog of human SFTPD (surfactant protein D); col-140 is a structural constituent of cuticle, based on protein domain information.
WBGene00000751	col-178	C34F6.2	3.94333	5.31348e-60	15.3837	O17641	NP_509869.1	COLlagen		structural constituent of cuticle [GO:0042302]		fat content increased, pathogen susceptibility increased	N.A.	Cell	cephalic sheath cell, hypodermis	col-178 is an ortholog of human MARCO (macrophage receptor with collagenous structure); col-178 is a structural constituent of cuticle, based on protein domain information; col-178 is expressed widely.
WBGene00000712	col-139	F41F3.4	3.52221	5.82624e-34	11.4892	Q20282	NP_504252.1	COLlagen		structural constituent of cuticle [GO:0042302]		locomotion variant, organism morphology variant	N.A.	N.A.	hypodermis	col-139 is a structural constituent of cuticle, based on protein domain information.
WBGene00000647	col-71	Y49F6B.10	3.38122	1.93467e-34	10.4195	Q9N4U2	NP_494562.1	COLlagen		structural constituent of cuticle [GO:0042302]		transgene expression reduced	N.A.	hyp7 syncytium, seam cell	amphid sheath cell, gon_male_dtc anterior, gon_male_dtc posterior, Z1.p, Z4.a	col-71 is an ortholog of human COLQ (collagen like tail subunit of asymmetric acetylcholinesterase); col-71 is a structural constituent of cuticle, based on protein domain information; col-71 is expressed in the hyp7 syncytium and the seam cell.
WBGene00000694	col-120	Y11D7A.11	3.29889	2.23916e-42	9.84159	Q9XWR2	NP_501617.1	COLlagen		structural constituent of cuticle [GO:0042302]		N.A.	N.A.	N.A.	AFD, amphid sheath cell, hypodermis	col-120 is an ortholog of human MARCO (macrophage receptor with collagenous structure); col-120 is a structural constituent of cuticle, based on protein domain information.
WBGene00000609	col-20	F11G11.11	3.15647	2.66652e-55	8.91644	P91249	NP_494879.2	COLlagen		structural constituent of cuticle [GO:0042302]		dauer lifespan extended, dumpy, no induction of antimicrobial peptide expression after infection	N.A.	N.A.	germ line, hypodermis	col-20 encodes a collagen; its expression pattern and mutant phenotypes are unknown.
WBGene00000703	col-129	M18.1	3.07362	2.58631e-26	8.41884	Q21556	NP_502297.1, NP_001293923.1	COLlagen		structural constituent of cuticle [GO:0042302]		N.A.	N.A.	hypodermis, intestine, seam cell	body wall musculature, dorsal nerve cord, FLP, germ line, hypodermis, lateral nerve cord, nerve ring, pharynx, somatic neuron, tail neuron, ventral nerve cord, vulval muscle	col-129 is an ortholog of human SFTPD (surfactant protein D); col-129 is a structural constituent of cuticle, based on protein domain information; col-129 is expressed in the hypodermis and the intestine.
WBGene00012500	hpo-2	Y26D4A.2	2.99787	5.81749e-33	7.98822	Q9U2Q4	NP_493285.2	Uncharacterized protein				Bacillus thuringiensis toxin hypersensitive, pore forming toxin hypersensitive	N.A.	N.A.	body wall musculature, male, male-specific, RID	Microarray, tiling array, and RNA sequencing studies indicate that hpo-2 is affected by cyc-1, rsr-2, clk-1, hrde-1, unc-39, hrp-2, emb-4, sma-2, sma-4, mir-243, tdp-1, and ain-2; RNA sequencing and microarray studies indicate that hpo-2 is affected by Multi-walled carbon nanotubes, Copper sulfate, and Sirolimus; RNA sequencing and microarray studies indicate that hpo-2 is enriched in the male, b…
WBGene00000256	bli-6	Y73B6BL.34	2.87206	2.26015e-22	7.32112	Q8MXR1	NP_741423.1	BLIstered cuticle		structural constituent of cuticle [GO:0042302]		N.A.	blistered	N.A.	amphid sheath cell, hypodermis, neuron	bli-6 encodes a collagen involved in adult cuticle structure.
WBGene00004394	rol-1	Y57A10A.11	2.7571	8.15662e-21	6.76035	Q9NA83	NP_496589.1	ROLler: helically twisted, animals roll when moving		structural constituent of cuticle [GO:0042302]		mitochondria morphology variant	dumpy, helical cuticle, left handed roller, roller	N.A.	amphid sheath cell	rol-1 encodes a nematode cuticular collagen required for normal body morphology at the adult stage of development; rol-1 expression is under the control of the heterochronic pathway, as heterochronic mutants that synthesize adult cuticle early produce animals that roll as larvae, while heterochronic mutants that fail to execute normal adult development never display the roller phenotype.
WBGene00001723	grl-14	T03D8.4	2.66419	1.16798e-57	6.3387	Q9XTY2	NP_001256955.1, NP_001256957.1, NP_001256956.1	GRound-Like (Grd related)				N.A.	N.A.	anterior arcade cell, arcade cell, reproductive system, vulva	ASER, NSM, pharynx, PLM, seam cell	grl-14 encodes a hedgehog-like protein, with an N-terminal signal sequence and a C-terminal Ground-like (Grl) domain; GRL-14 is expressed in intestine, head mesodermal cell, hypodermis, seam cells, and uterine muscle, larval arcade cells and reproductive system, and the developing vulva; the Grl domain is predicted to form a cysteine-crosslinked protein involved in intercellular signalling, and i…
WBGene00015937	C17H12.12	C17H12.12	2.62767	7.53544e-30	6.18026	O45084	NP_501042.2	Uncharacterized protein				N.A.	N.A.	N.A.	germ line, male, muscle cell	RNA sequencing and microarray studies indicate that C17H12.12 is affected by Ethanol, Nicotinic acid, Methylmercuric chloride, Manganese chloride, D-glucose, Zidovudine, Resveratrol, Acrylamide, Hydrolyzable Tannins, Humic substances, single-walled carbon nanotubes, Paraquat, Colistin, adsorbable organic bromine compounds, and Sirolimus; RNA sequencing studies indicate that C17H12.12 is enriched …
WBGene00000657	col-81	F38A3.1	2.57745	1.07665e-18	5.96886	Q20135	NP_496361.1	COLlagen		structural constituent of cuticle [GO:0042302]		N.A.	N.A.	N.A.	gon_male_dtc anterior, gon_male_dtc posterior, Z1, Z1.p, Z4, Z4.a	col-81 is an ortholog of human MARCO (macrophage receptor with collagenous structure); col-81 is a structural constituent of cuticle, based on protein domain information.
WBGene00000655	col-79	C09G5.3	2.56923	2.09038e-41	5.93494	Q09233	NP_496308.1	Putative cuticle collagen 79		structural constituent of cuticle [GO:0042302]		blistered	N.A.	N.A.	amphid sheath cell, hypodermis	col-79 is an ortholog of human SFTPD (surfactant protein D); col-79 is a structural constituent of cuticle, based on protein domain information.
WBGene00000663	col-88	W05G11.3	2.51963	1.16697e-18	5.73437	O44904	NP_497131.1	COLlagen		structural constituent of cuticle [GO:0042302]		organism hypertonic lethality increased	N.A.	N.A.	N.A.	col-88 is an ortholog of human SFTPD (surfactant protein D); col-88 is a structural constituent of cuticle, based on protein domain information.
WBGene00005528	sri-16	F15H9.4	2.44515	1.13516e-21	5.44583	O62177	NP_493071.2	Serpentine Receptor, class I	detection of chemical stimulus involved in sensory perception [GO:0050907]			N.A.	N.A.	N.A.	N.A.	Microarray and RNA sequencing studies indicate that sri-16 is affected by clk-1, csr-1, pgl-1, pgl-3, glh-4, glh-1, unc-75, dop-1, hrp-2, and smg-2; microarray and RNA sequencing studies indicate that sri-16 is affected by Methylmercuric chloride, Zidovudine, Resveratrol, and Sirolimus.
WBGene00012791	Y43D4A.5	Y43D4A.5	2.37285	5.62376e-25	5.17962	H8ESG5	NP_001255902.2, NP_001255900.2, NP_001255899.2, NP_001255901.2	Uncharacterized protein				N.A.	N.A.	N.A.	gon_male_dtc anterior, gon_male_dtc posterior, Z1, Z1.p, Z4, Z4.a	Microarray and RNA sequencing studies indicate that Y43D4A.5 is affected by Heme, Hydrogen sulfide, Methylmercury hydroxide, Nicotinic acid, D-glucose, 4-bromodiphenyl ether, Atrazine, Dibromoacetic acid, and Sirolimus; RNA sequencing studies indicate that Y43D4A.5 is enriched in the gon_male_dtc posterior, gon_male_dtc anterior, Z1.p, Z4.a, Z4, and Z1.
WBGene00004098	pqn-2	AC3.4	2.32905	2.02592e-20	5.02473	Q17401	NP_505668.2	Prion-like-(Q/N-rich)-domain-bearing protein				dauer constitutive, L4 lethal, pathogen infected pharynx increase, pathogen susceptibility increased, shortened life span	N.A.	N.A.	pharynx	The protein product of this gene is predicted to contain a glutamine/asparagine (Q/N)-rich ('prion') domain, by the algorithm of Michelitsch and Weissman (as of the WS77 release of WormBase, i.e., in wormpep77).
WBGene00000711	col-138	C52D10.13	2.31622	3.46276e-15	4.98025	A3QM98	NP_503048.1	COLlagen		structural constituent of cuticle [GO:0042302]		N.A.	N.A.	N.A.	amphid sheath cell	col-138 is an ortholog of human MARCO (macrophage receptor with collagenous structure); col-138 is a structural constituent of cuticle, based on protein domain information.
WBGene00000608	col-19	ZK1193.1	2.18708	1.18582e-13	4.55382	P18835	NP_001033577.1	collagen	collagen and cuticulin-based cuticle development [GO:0040002]; cuticle development involved in collagen and cuticulin-based cuticle molting cycle [GO:0042338]	structural constituent of collagen and cuticulin-based cuticle [GO:0042329]; structural constituent of cuticle [GO:0042302]		breaks in alae, dauer constitutive, multiple alae	N.A.	cuticle, hyp7 syncytium, hypodermis, male, seam cell, syncytium, vulva	body wall muscle cell, cephalic sheath cell, hypodermis	col-19 encodes a member of the collagen superfamily containing collagen triple helix repeats (20 copies) that is required for normal structure of the alae; expressed during the L2-to-dauer and L4-to-adult molts with strongest expression in adult animals.
WBGene00000251	bli-1	C09G5.6	2.12715	4.54919e-13	4.36852	Q09457	NP_496311.2	collagen	collagen and cuticulin-based cuticle development [GO:0040002]; cuticle development involved in collagen and cuticulin-based cuticle molting cycle [GO:0042338]	structural constituent of collagen and cuticulin-based cuticle [GO:0042329]		blistered, embryonic lethal, larval lethal, locomotion variant, maternal sterile, molt defect, transgene expression variant	annulae morphology variant, blistered, male tail morphology variant, pattern of transgene expression variant	hyp7 syncytium, seam cell	amphid sheath cell, hypodermis, OLL, PVD	The bli-1 gene encodes an unusual cuticular collagen that is required for proper strut formation within the unique medial layer of the adult cuticle; bli-1 interacts genetically with other cuticular collagens such as bli-2 and rol-1, and may be processed for secretion by BLI-4, a Kex2/subtilisin serine endoproteinase; consistent with its role in adult cuticle formation, bli-1 mRNA is highly expre…
WBGene00010461	K01D12.1	K01D12.1	2.08353	3.43223e-13	4.23843	Q21090	NP_506099.1	Uncharacterized protein				chemical resistant	N.A.	N.A.	coelomocyte, hypodermis, intestine	Microarray and RNA sequencing studies indicate that K01D12.1 is affected by Methylmercuric chloride, Mercuric Chloride, Rotenone, Tunicamycin, Sesamin, Zidovudine, Cadmium, Quercetin, Colistin, and Sirolimus; tiling array studies indicate that K01D12.1 is enriched in the coelomocytes, hypodermis, and intestine.
WBGene00005191	srg-34	Y51A2D.12	2.07292	2.16067e-21	4.20739	Q9XXQ5	NP_507631.1	Serpentine receptor class gamma	sensory perception of chemical stimulus [GO:0007606]	transmembrane signaling receptor activity [GO:0004888]		N.A.	N.A.	N.A.	gon_male_dtc anterior, gon_male_dtc posterior, Z1, Z1.p, Z4, Z4.a	srg-34 is predicted to have transmembrane signaling receptor activity, based on protein domain information.
WBGene00000653	col-77	M195.1	2.0327	2.70985e-29	4.0917	Q21562	NP_495759.1	COLlagen		structural constituent of cuticle [GO:0042302]		motor neuron morphology variant, rays displaced, synapse density variant, transgene subcellular localization variant	N.A.	N.A.	DA neuron, hypodermis, VA neuron	col-77 encodes a cuticular collagen; as loss of col-77 activity via RNAi screens results in no obvious defects, the precise role of col-77 in C. elegans development and/or behavior is not yet known.
WBGene00010163	F56H6.2	F56H6.2	2.01482	4.50317e-13	4.0413	O45580	NP_493103.1	Uncharacterized protein				N.A.	N.A.	N.A.	muscle cell	Microarray and RNA sequencing studies indicate that F56H6.2 is affected by daf-12, csr-1, ham-3, dop-1, dpy-21, mys-1, mir-34, pgl-1, pgl-3, glh-4, glh-1, eri-1, mut-2, rrf-1, and rrf-2; microarray and RNA sequencing studies indicate that F56H6.2 is affected by Methylmercuric chloride, Multi-walled carbon nanotubes, Fluoranthene, Tetrabromobisphenol A, adsorbable organic bromine compounds, and Si…
WBGene00015929	C17H12.3	C17H12.3	1.98976	1.07481e-12	3.97172	O45085	NP_501041.1	Tyrosine-protein phosphatase		protein tyrosine phosphatase activity [GO:0004725]		N.A.	N.A.	N.A.	germ line, hypodermis, male	C17H12.3 is predicted to have protein tyrosine phosphatase activity, based on protein domain information.
WBGene00012596	nhr-234	Y38E10A.18	1.95252	2.80812e-16	3.87051	Q9NAJ3	NP_496701.1	Nuclear Hormone Receptor family	transcription, DNA-templated [GO:0006351]	DNA binding transcription factor activity [GO:0003700]; sequence-specific DNA binding [GO:0043565]; zinc ion binding [GO:0008270]		fat content increased	pathogen susceptibility increased	N.A.	intestine	nhr-234 is predicted to have DNA-binding transcription factor activity, sequence-specific DNA binding activity, and zinc ion binding activity, based on protein domain information.
WBGene00002120	ins-37	F08G2.6	1.94487	1.16036e-15	3.85003	Q9XVA1	NP_496902.2	INSulin related		hormone activity [GO:0005179]		N.A.	N.A.	intestine	AFD, germ line, gon_male_dtc anterior, gon_male_dtc posterior, male, Z1.p, Z4.a	ins-37 encodes an insulin-like peptide.
WBGene00000636	col-60	F22D6.10	1.89937	7.76745e-11	3.73051	Q19725	NP_492013.1	COLlagen		structural constituent of cuticle [GO:0042302]		developmental delay postembryonic	N.A.	N.A.	AFD	col-60 is an ortholog of human SFTPD (surfactant protein D); col-60 is a structural constituent of cuticle, based on protein domain information.
WBGene00015950	C18A11.4	C18A11.4	1.84704	1.78954e-13	3.59762	Q18065	NP_509354.1	Uncharacterized protein				N.A.	N.A.	N.A.	N.A.	Microarray, tiling array, and RNA sequencing studies indicate that C18A11.4 is affected by cyc-1, rsr-2, tatn-1, bar-1, ubc-9, clk-1, cox-5B, jmjd-3.1, jmjd-1.2, daf-2, hsf-1, mir-34, daf-12, daf-16, dpy-21, lin-22, and nhr-25; microarray and RNA sequencing studies indicate that C18A11.4 is affected by Tryptophan, Methylmercuric chloride, Multi-walled carbon nanotubes, Indole, Sirolimus, and Alla…
WBGene00007250	nspb-8	C01G12.10	1.84133	1.27219e-12	3.5834	Q7YX80	NP_001021903.1	Nematode Specific Peptide family, group B				N.A.	N.A.	N.A.	N.A.	Tiling array, RNA sequencing, and microarray studies indicate that nspb-8 is affected by hpl-2, nhr-62, eat-2, emr-1, lem-2, swsn-2.2, dpy-21, mir-34, alg-1, sma-2, sma-4, lin-22, and mir-243; microarray and RNA sequencing studies indicate that nspb-8 is affected by Hydrogen sulfide, D-glucose, and Triclosan.
WBGene00007243	nspb-7	C01G12.2	1.79461	4.68554e-10	3.46922	O45234	NP_497029.2	Nematode Specific Peptide family, group B				N.A.	N.A.	N.A.	hypodermis	Tiling array, microarray, and RNA sequencing studies indicate that nspb-7 is affected by hpl-2, spe-44, emr-1, lem-2, dpy-21, mir-34, daf-12, alg-1, alg-2, lin-22, sir-2.1, slr-2, aak-2, crh-1, tax-6, tdp-1, tbx-2, isp-1, nuo-6, and hlh-25; RNA sequencing and microarray studies indicate that nspb-7 is affected by D-glucose, Quercetin, Hydrolyzable Tannins, Paraquat, Benzene, Dafa#1, adsorbable or…
WBGene00019931	R07C12.1	R07C12.1	1.75617	6.15138e-13	3.378	O44525	NP_500497.1	Uncharacterized protein	innate immune response [GO:0045087]			N.A.	N.A.	N.A.	DA neuron, dopaminergic neuron, VA neuron	Microarray studies indicate that R07C12.1 is affected by Tunicamycin, Levamisole, Procyanidin, Fluoranthene, Cry5B, Humic substances, single-walled carbon nanotubes, Colistin, Sirolimus, and Allantoin; tiling array and microarray studies indicate that R07C12.1 is enriched in the dopaminergic and DA neurons.
WBGene00005685	sru-22	F36G9.5	1.74242	8.90945e-11	3.34596	O45474	NP_507005.1	Serpentine Receptor, class U				N.A.	N.A.	N.A.	N.A.	Tiling array, microarray, and RNA sequencing studies indicate that sru-22 is affected by hpl-2, nhr-114, clk-1, glp-1, mir-34, hrp-2, his-3, eat-2, and let-60; microarray studies indicate that sru-22 is affected by Tryptophan, Atrazine, single-walled carbon nanotubes, and Sirolimus.
WBGene00018630	F49D11.6	F49D11.6	1.73192	4.25577e-12	3.32169	O44721	NP_492843.2	Uncharacterized protein	chondroitin sulfate biosynthetic process [GO:0030206]; positive regulation of response to oxidative stress [GO:1902884]	chondroitin 4-sulfotransferase activity [GO:0047756]		N.A.	N.A.	N.A.	hypodermis	F49D11.6 is predicted to have chondroitin 4-sulfotransferase activity, based on protein domain information.
WBGene00008511	F01G10.9	F01G10.9	1.72084	1.43618e-14	3.29627	O17767	NP_501881.3	Uncharacterized protein				accumulated germline cell corpses, apoptosis variant, cell membrane organization biogenesis variant, diplotene region organization variant, germ cell compartment anucleate, germ cell compartment expansion variant, germ cell compartment morphology variant, gonad vesiculated, maternal sterile, nuclei enlarged, oocyte morphology variant, oocyte number decreased, oocytes lack nucleus, pachytene regio…	lethal, sterile	N.A.	hypodermis	Microarray and RNA sequencing studies indicate that F01G10.9 is affected by Heme, Methylmercury hydroxide, Zidovudine, Colistin, Dafa#1, and Sirolimus; tiling array studies indicate that F01G10.9 is enriched in the hypodermis.
WBGene00000749	col-176	ZC373.7	1.71567	1.5872e-16	3.28448	Q23263	NP_509692.1	COLlagen		structural constituent of cuticle [GO:0042302]; structural molecule activity [GO:0005198]		dumpy, protein aggregation variant	N.A.	N.A.	coelomocyte, hypodermis, male-specific, OLL, PVD, ventral nerve cord	col-176 is an ortholog of human SFTPD (surfactant protein D); col-176 is a structural constituent of cuticle, based on protein domain information.
WBGene00001700	grd-11	K02E2.2	1.71553	7.16471e-12	3.28417	Q9XUV2	NP_507923.2	GRounDhog (Hedgehog-like family)	intein-mediated protein splicing [GO:0016539]	peptidase activity [GO:0008233]		N.A.	N.A.	N.A.	muscle cell	grd-11 encodes a hedgehog-like protein, with (from N- to C-terminus) a signal sequence, four Ground domains, an short region of low-complexity sequence, and a Hint/Hog domain; the Hint/Hog domain is predicted to cut GRD-2 into two halves and then covalently link cholesterol to the C-terminus of the Ground domain; the four N-terminal Ground domains are predicted to form one or more cysteine-crossl…
WBGene00044480	ZK185.4	ZK185.4	1.71534	1.25046e-09	3.28375	Q3V5H7	NP_001033462.1, NP_001294336.1	Uncharacterized protein				N.A.	N.A.	N.A.	N.A.	ZK185.4 is an ortholog of human PGAP2 (post-GPI attachment to proteins 2); tiling array, microarray, and RNA sequencing studies indicate that ZK185.4 is affected by rsr-2, bar-1, wrn-1, hsf-1, dpy-21, daf-12, daf-16, emb-4, smg-2, and cox-5B; RNA sequencing studies indicate that ZK185.4 is affected by Multi-walled carbon nanotubes.
WBGene00044032	ceh-99	T21B4.17	1.70535	7.96328e-15	3.26108	Q5FC44	NP_001022352.1	C. Elegans Homeobox		DNA binding [GO:0003677]		axon fasciculation variant, axon midline crossing variant, cord commissures fail to reach target, transgene expression reduced, ventral cord patterning variant	N.A.	N.A.	body wall muscle cell, germ line	ceh-99 is a divergent homeobox gene; it encodes four homeodomains, and is located close to ceh-100 on chromosome II and may be a recent paralog; most homeodomain proteins bind DNA and function as transcription factors; ceh-99 is involved in axonal fasciculation.
WBGene00000675	col-101	K02D7.3	1.64753	1.85477e-13	3.13297	O45105	NP_001294644.1, NP_499905.2	COLlagen		structural constituent of cuticle [GO:0042302]		avoids bacterial lawn, pale, slow growth, transgene expression increased	N.A.	N.A.	cephalic sheath cell, coelomocyte, dopaminergic neuron, germ line, gon_male_dtc anterior, gon_male_dtc posterior, hypodermis, OLL, PVD, ventral nerve cord, Z1, Z1.p, Z4, Z4.a	col-101 encodes a cuticle collagen; loss of col-101 via large-scale RNAi screens results in animals that are pale and slow growing.
WBGene00015360	C02G6.2	C02G6.2	1.63994	5.01534e-09	3.11654	Q17593	NP_504531.2	Uncharacterized protein		metal ion binding [GO:0046872]; metalloendopeptidase activity [GO:0004222]		N.A.	N.A.	N.A.	dopaminergic neuron, male	C02G6.2 is an ortholog of human Ide (insulin degrading enzyme); C02G6.2 is predicted to have catalytic activity and metal ion binding activity, based on protein domain information.
WBGene00014053	ZK669.3	ZK669.3	1.61261	4.28906e-14	3.05805	Q23570	NP_495669.1	GILT-like protein ZK669.3				N.A.	N.A.	N.A.	dopaminergic neuron, hypodermis, OLL, PVD, ventral nerve cord	ZK669.3 is an ortholog of human IFI30 (IFI30, lysosomal thiol reductase); RNA sequencing and microarray studies indicate that ZK669.3 is affected by Rotenone, Procyanidin, Atrazine, Chlorpyrifos, Diazinon, Quercetin, Hydrolyzable Tannins, Humic substances, and Dafa#1; tiling array and RNA sequencing studies indicate that ZK669.3 is enriched in the ventral nerve cord and hypodermis and in the dopa…
WBGene00012307	W06F12.3	W06F12.3	1.58248	3.34176e-10	2.99484	O45897	NP_499835.1	Uncharacterized protein	peptidyl-serine phosphorylation [GO:0018105]; regulation of cell shape [GO:0008360]	ATP binding [GO:0005524]; protein serine/threonine kinase activity [GO:0004674]		organism development variant	N.A.	N.A.	amphid sheath cell, hypodermis, NSM, pharynx	W06F12.3 is an ortholog of human TTBK1 (tau tubulin kinase 1), CTD-2116N17.1 and TTBK2 (tau tubulin kinase 2); W06F12.3 is predicted to have ATP binding activity and protein kinase activity, based on protein domain information.
WBGene00001547	gcy-22	T03D8.5	1.58131	2.99543e-29	2.99242	Q9XTY1	NP_001263952.1, NP_001263951.1, NP_508018.2	Receptor-type guanylate cyclase gcy-22 (EC 4.6.1.2)	associative learning [GO:0008306]; cGMP biosynthetic process [GO:0006182]; chemosensory behavior [GO:0007635]; chemotaxis [GO:0006935]; intracellular signal transduction [GO:0035556]; positive regulation of calcium-mediated signaling [GO:0050850]; response to inorganic substance [GO:0010035]; response to lithium ion [GO:0010226]; response to magnesium ion [GO:0032026]; response to methionine [GO:…	ATP binding [GO:0005524]; GTP binding [GO:0005525]; guanylate cyclase activity [GO:0004383]; protein kinase activity [GO:0004672]		N.A.	ammonium acetate chemotaxis defective, aqueous positive chemotaxis defective, axon morphology variant, bromide chemotaxis defective, chemotaxis variant, chloride chemotaxis defective, iodide chemotaxis defective, lithium chemotaxis defective, magnesium chemotaxis defective, second messenger mediated signaling variant	ASER	AFD, ASER, neuron, PLM	gcy-22 is predicted to encode a guanylate cyclase.
WBGene00012086	clec-144	T27D12.3	1.57048	8.27043e-14	2.97003	Q22831	NP_496528.2	C-type LECtin		carbohydrate binding [GO:0030246]		N.A.	N.A.	N.A.	N.A.	Microarray, tiling array, and RNA sequencing studies indicate that clec-144 is affected by lin-15B, daf-16, hpl-2, rsr-2, bar-1, clk-1, mir-34, daf-12, cox-5B, aak-2, crh-1, octr-1, and nhr-25; microarray studies indicate that clec-144 is affected by Tunicamycin, Resveratrol, Cry5B, and Sirolimus.
WBGene00007508	C10C5.4	C10C5.4	1.55119	2.30121e-09	2.93058	Q17899	NP_501651.1	Aminoacylase	cellular amino acid metabolic process [GO:0006520]	aminoacylase activity [GO:0004046]; metallopeptidase activity [GO:0008237]		dauer constitutive	N.A.	N.A.	hypodermis, intestine	C10C5.4 encodes an aminoacylase with similarity to the vertebrate aminoacylase-I; by homology, the product of C10C5.4 is predicted to hydrolyze N-acetyl amino acids into the free amino acid and carboxylate.
WBGene00007246	nspb-10	C01G12.6	1.54144	4.43694e-08	2.91085	O45237	NP_497032.1	Nematode Specific Peptide family, group B				N.A.	N.A.	N.A.	N.A.	Tiling array, microarray, and RNA sequencing studies indicate that nspb-10 is affected by hpl-2, let-7, bar-1, npr-1, dpy-21, mir-34, elli-1, mir-35, alg-1, alg-2, sma-2, sma-4, lin-22, and spr-5; RNA sequencing and microarray studies indicate that nspb-10 is affected by Multi-walled carbon nanotubes, Neurotoxins, Atrazine, and Triclosan.
WBGene00018707	oac-31	F52F10.3	1.49962	2.64196e-15	2.82769	Q9UAQ8	NP_503441.2	O-ACyltransferase homolog		transferase activity, transferring acyl groups other than amino-acyl groups [GO:0016747]		N.A.	N.A.	N.A.	intestine	oac-31 is predicted to have transferase activity, transferring acyl groups other than amino-acyl groups, based on protein domain information.
WBGene00016287	C31H1.2	C31H1.2	1.49259	4.02664e-07	2.81394	Q18337	NP_500862.3	Uncharacterized protein				N.A.	N.A.	N.A.	N.A.	Microarray and RNA sequencing studies indicate that C31H1.2 is affected by nhr-114, bar-1, npr-1, jmjd-3.1, hsf-1, dpy-21, pgl-1, pgl-3, glh-4, glh-1, smg-2, mir-71, sir-2.1, isp-1, nuo-6, and eat-2; microarray studies indicate that C31H1.2 is affected by Tunicamycin, Paraquat, and Sirolimus.
WBGene00003015	lin-29	W03C9.4	1.48416	4.50256e-07	2.79754	G5EGB2	NP_496545.1, NP_001254324.1, NP_001122649.1	Transcription factor	negative regulation of dauer larval development [GO:0061067]; regulation of development, heterochronic [GO:0040034]; regulation of programmed cell death [GO:0043067]	RNA polymerase II regulatory region sequence-specific DNA binding [GO:0000977]		body wall muscle sarcomere morphology variant, dauer lifespan extended, developmental timing variant, egg laying defective, egg laying variant, exploded through vulva, gene expression level high, gene expression level reduced, gonad development variant, larval lethal, linker cell migration variant, locomotion variant, male gonad development variant, male somatic gonad development variant, male ta…	adult cuticle development variant, alae absent, bag of worms, developmental timing variant, egg laying defective, egg laying imipramine resistant, egg laying levamisole resistant, egg laying phentolamine resistant, egg laying serotonin resistant, egg laying variant, everted vulva, extra cell division postembryonic, gene expression level high, gene expression level reduced, lethal, molt defect, pr…	Anchor cell, AS11, B cell, B.a, B.al, B.ala, B.alaa, B.alap, B.alapa, B.alapaa, B.alapaav, B.alapap, B.alapp, B.alappd, B.alp, B.alpa, B.alpaa, B.alpapa, B.alpp, B.ar, B.ara, B.araa, B.arap, B.arapa, B.arapaa, B.arapaav, B.arapap, B.arapp, B.arappd, B.arp, B.arpa, B.arpaa, B.arpap, B.arpapa, B.arpp, B.p, B.pa, B.pp, B.ppa, B.ppaa, B.ppp, B.pppp, B.ppppp, CA9, CP9, DTC, F cell, gon_male_vdef, head…	AFD, ASER, GABAergic neuron, gon_male_dtc anterior, gon_male_dtc posterior, male-specific, OLL, PLM, PVD, Z1.p, Z4.a	lin-29 encodes a zinc finger transcription factor of the C2H2 type that affects the heterochronic development of the vulva, egg laying system, male gonad, cuticle, molting cycle and vitellogenesis; expressed in uterine and vulval muscle cells, seam cells, pharynx, head neurons, ventral cord neurons, preanal ganglion, distal tip cells, anchor cell, vulval cells, male-specific linker cell, and cell…
WBGene00020550	T17H7.1	T17H7.1	1.48205	1.25681e-20	2.79345	Q22537	NP_497250.1	Uncharacterized protein				embryonic lethal, fat content reduced	N.A.	OLLL, OLLR, pharynx	OLL, PVD	T17H7.1 is expressed in the pharynx and certain outer labial neurons.
WBGene00017264	F08F3.8	F08F3.8	1.46306	2.95727e-07	2.75692	Q22948	NP_504437.1	Uncharacterized protein				N.A.	N.A.	N.A.	germ line	Microarray and RNA sequencing studies indicate that F08F3.8 is affected by lin-35, sma-2, nhr-114, fbf-1, clk-1, hrde-1, npr-1, hsf-1, let-418, mir-34, pgl-1, pgl-3, glh-4, glh-1, and sir-2.1; microarray studies indicate that F08F3.8 is affected by Colistin, adsorbable organic bromine compounds, and Sirolimus; RNA sequencing studies indicate that F08F3.8 is enriched in the germ line.
WBGene00000024	abu-1	AC3.3	1.45631	1.04802e-09	2.74406	Q17400	NP_505667.1	Activated in Blocked Unfolded protein response	endoplasmic reticulum unfolded protein response [GO:0030968]			dauer constitutive, L4 lethal, pathogen infected pharynx increase, pathogen susceptibility increased, shortened life span, thermotolerance reduced	N.A.	pharynx	DA neuron, intestine, VA neuron	abu-1 encodes a transmembrane protein with a predicted signal sequence, a glutamine/asparagine-rich domain and multiple cysteine-rich repeats (DUF139); abu-1 expression is induced by blockage of the endoplasmic reticulum unfolded protein response, and ABU-1 may help protect the organism from damage by improperly folded nascent protein; when expressed in COS1 cells, ABU-1 localizes to the endoplas…
WBGene00012656	Y39A1A.18	Y39A1A.18	1.44363	8.67697e-07	2.72005	Q9XX29	NP_499355.2	Uncharacterized protein				sterile F1	N.A.	N.A.	N.A.	Microarray and RNA sequencing studies indicate that Y39A1A.18 is affected by spe-44, clk-1, csr-1, pgl-1, pgl-3, glh-4, glh-1, jmjd-3.1, jmjd-1.2, dop-1, let-418, chd-3, dpy-21, mir-34, smg-2, crh-1, tax-6, isp-1, nuo-6, and pmk-1; microarray and RNA sequencing studies indicate that Y39A1A.18 is affected by Methylmercuric chloride, Multi-walled carbon nanotubes, Paraquat, and Colistin.
WBGene00008709	F11E6.6	F11E6.6	1.43896	3.72325e-12	2.71126	Q9U3J7	NP_503113.2	Uncharacterized protein				embryonic lethal	N.A.	N.A.	intestine	F11E6.6 is an ortholog of human TMEM150C (transmembrane protein 150C), TMEM150B (transmembrane protein 150B), TMEM150A (transmembrane protein 150A), DRAM1 (DNA damage regulated autophagy modulator 1) and DRAM2 (DNA damage regulated autophagy modulator 2); microarray, tiling array, and RNA sequencing studies indicate that F11E6.6 is affected by zfp-1, lin-15B, lin-35, daf-12, tatn-1, prg-1, glp-1,…
WBGene00000639	col-63	ZK265.2	1.43444	4.1572e-07	2.70277	Q94399	NP_492245.1	COLlagen		structural constituent of cuticle [GO:0042302]		N.A.	N.A.	N.A.	amphid sheath cell, gon_male_dtc anterior, gon_male_dtc posterior, Z1, Z1.p, Z4, Z4.a	col-63 is an ortholog of human SFTPD (surfactant protein D); col-63 is a structural constituent of cuticle, based on protein domain information.
WBGene00021627	Y47D7A.15	Y47D7A.15	1.42524	8.86547e-09	2.68559	Q8WTL8	NP_741525.4	Uncharacterized protein				N.A.	N.A.	N.A.	coelomocyte, ventral nerve cord	Microarray and RNA sequencing studies indicate that Y47D7A.15 is affected by Hydrogen sulfide, Ethanol, 1-methylnicotinamide, Nicotinic acid, Rotenone, Manganese chloride, Sodium arsenite, Multi-walled carbon nanotubes, D-glucose, Nanoparticle, Chlorpyrifos, Quercetin, single-walled carbon nanotubes, Dafa#1, adsorbable organic bromine compounds, Allantoin, and Sirolimus; tiling array studies indi…
WBGene00010980	R02D5.7	R02D5.7	1.36859	3.09746e-07	2.58218	O62323	NP_506592.1	Uncharacterized protein				dauer lifespan extended	N.A.	N.A.	intestine, male	Microarray and RNA sequencing studies indicate that R02D5.7 is affected by Methylmercuric chloride, Rotenone, Manganese chloride, D-glucose, Resveratrol, Acrylamide, Chlorpyrifos, Paraquat, and Colistin; RNA sequencing studies indicate that R02D5.7 is enriched in the intestine and male.
WBGene00012297	W06D4.3	W06D4.3	1.36397	4.83653e-07	2.57393	Q9XW43	NP_492435.1	Uncharacterized protein				N.A.	N.A.	N.A.	excretory cell, gon_male_dtc anterior, gon_male_dtc posterior, hermaphrodite-specific, male, Z1, Z1.p, Z4, Z4.a	RNA sequencing and microarray studies indicate that W06D4.3 is affected by Manganese chloride, Resveratrol, Paraquat, Colistin, and Octopamine; tiling array and RNA sequencing studies indicate that W06D4.3 is enriched in the excretory cell, gon_male_dtc posterior, gon_male_dtc anterior, Z1.p, Z4.a, Z4, Z1, male, and hermaphrodite-specific tissues.
WBGene00044235	C06A1.7	C06A1.7	1.35032	3.22868e-06	2.54968	Q565C8	NP_001021922.2	Uncharacterized protein				N.A.	N.A.	N.A.	N.A.	Tiling array, RNA sequencing, and microarray studies indicate that C06A1.7 is affected by daf-12, rsr-2, emr-1, lem-2, csr-1, ubc-9, clk-1, tdp-1, cox-5B, jmjd-3.1, jmjd-1.2, daf-16, dpy-21, lin-22, aak-2, tax-6, oga-1, pmk-1, and hlh-25; microarray studies indicate that C06A1.7 is affected by adsorbable organic bromine compounds.
WBGene00009487	clec-232	F36G9.11	1.34859	1.53332e-06	2.54664	O45469	NP_507006.1	C-type LECtin		carbohydrate binding [GO:0030246]		N.A.	N.A.	N.A.	body wall muscle cell, DA neuron, male, VA neuron	Microarray and RNA sequencing studies indicate that clec-232 is affected by nhr-114, csr-1, clk-1, npr-1, hsf-1, dpy-21, emb-4, mir-71, mir-243, and eat-2; RNA sequencing and microarray studies indicate that clec-232 is affected by D-glucose, Zidovudine, Colistin, Sirolimus, and Allantoin; tiling array and RNA sequencing studies indicate that clec-232 is enriched in the body wall muscle cell and …
WBGene00018465	F45E1.4	F45E1.4	1.32926	1.6938e-19	2.51273	D7SFJ0	NP_509345.2	Uncharacterized protein	metabolic process [GO:0008152]	hydrolase activity [GO:0016787]		N.A.	N.A.	N.A.	coelomocyte, excretory cell, hypodermis, intestine, ventral nerve cord	F45E1.4 is an ortholog of human NANP (N-acetylneuraminic acid phosphatase); F45E1.4 is predicted to have hydrolase activity, based on protein domain information.
WBGene00007251	nspb-9	C01G12.11	1.31102	2.00572e-06	2.48117	Q7YX79	NP_001021904.1	Nematode Specific Peptide family, group B				N.A.	N.A.	N.A.	N.A.	Tiling array, microarray, and RNA sequencing studies indicate that nspb-9 is affected by hpl-2, nhr-114, swsn-2.2, dpy-21, mir-34, lin-22, slr-2, aak-2, crh-1, tax-6, daf-2, tdp-1, tbx-2, isp-1, nuo-6, and hlh-25; RNA sequencing and microarray studies indicate that nspb-9 is affected by Methylmercury hydroxide, Multi-walled carbon nanotubes, D-glucose, Quercetin, Hydrolyzable Tannins, Benzene, Da…
WBGene00015497	nhr-76	C05G6.1	1.31064	1.70127e-15	2.48051	Q65CM0	NP_499961.2	Nuclear Hormone Receptor family	positive regulation of fatty acid beta-oxidation by positive regulation of transcription from RNA polymerase II promoter [GO:0097235]; transcription, DNA-templated [GO:0006351]	DNA binding transcription factor activity [GO:0003700]; sequence-specific DNA binding [GO:0043565]; zinc ion binding [GO:0008270]		serotonin induced fat reduction variant, transgene expression reduced	solitary feeding increased	body wall musculature, excretory gland cell, head, intestine, pharynx, seam cell, vulval muscle	gon_male_dtc anterior, gon_male_dtc posterior, intestine, Z1, Z1.p, Z4, Z4.a	nhr-76 is an ortholog of human NR2E3 (nuclear receptor subfamily 2 group E member 3); nhr-76 is involved in positive regulation of fatty acid beta-oxidation by positive regulation of transcription from RNA polymerase II promoter; nhr-76 is predicted to have DNA-binding transcription factor activity, sequence-specific DNA binding activity, and zinc ion binding activity, based on protein domain inf…
WBGene00009412	F35E2.5	F35E2.5	1.29965	6.93465e-06	2.46169	O62223	NP_492992.1	Uncharacterized protein				N.A.	N.A.	N.A.	germ line, male, muscle cell	Microarray and RNA sequencing studies indicate that F35E2.5 is affected by Methylmercuric chloride, Rotenone, Resveratrol, Atrazine, Cadmium, Fluoranthene, Paraquat, Colistin, and Cholesterol; RNA sequencing studies indicate that F35E2.5 is enriched in the germ line, muscle cell, and male.
WBGene00019580	oac-58	K09E10.2	1.29434	6.98161e-08	2.45265	A3QMD3	NP_001293983.1, NP_502345.1	O-ACyltransferase homolog		transferase activity, transferring acyl groups other than amino-acyl groups [GO:0016747]		N.A.	N.A.	N.A.	intestine	oac-58 is predicted to have transferase activity, transferring acyl groups other than amino-acyl groups, based on protein domain information.
WBGene00020832	T26C12.2	T26C12.2	1.29306	2.08187e-06	2.45047	O61857	NP_500307.1	Uncharacterized protein				N.A.	N.A.	N.A.	dopaminergic neuron	Microarray and RNA sequencing studies indicate that T26C12.2 is affected by age-1, lin-15B, eat-2, emr-1, lem-2, csr-1, npr-1, dpy-21, mir-34, hrp-2, pgl-1, pgl-3, glh-4, and glh-1; microarray and RNA sequencing studies indicate that T26C12.2 is affected by Tunicamycin, Multi-walled carbon nanotubes, Cadmium, and single-walled carbon nanotubes; tiling array studies indicate that T26C12.2 is enric…
WBGene00022649	ZK84.1	ZK84.1	1.28829	3.70666e-16	2.44238	Q23635	NP_495202.1	Uncharacterized protein				N.A.	N.A.	N.A.	germ line	Microarray and RNA sequencing studies indicate that ZK84.1 is affected by Hydrogen sulfide, Rotenone, Sodium arsenite, D-glucose, Zidovudine, Resveratrol, Chlorpyrifos, Humic substances, Selenium, Colistin, Dafa#1, adsorbable organic bromine compounds, Allantoin, and Sirolimus; proteomic studies indicate that ZK84.1 is enriched in the germ line.
WBGene00001250	elt-2	C33D3.1	1.27359	2.27391e-12	2.41763	Q10655	NP_509755.2	Transcription factor elt-2	cell differentiation [GO:0030154]; defense response to Gram-negative bacterium [GO:0050829]; digestion [GO:0007586]; endoderm development [GO:0007492]; innate immune response [GO:0045087]; nematode larval development [GO:0002119]; positive regulation of transcription by RNA polymerase II [GO:0045944]; positive regulation of transcription from RNA polymerase II promoter involved in defense respons…	chromatin binding [GO:0003682]; DNA binding transcription factor activity [GO:0003700]; double-stranded DNA binding [GO:0003690]; RNA polymerase II regulatory region sequence-specific DNA binding [GO:0000977]; RNA polymerase II transcription factor binding [GO:0001085]; transcriptional activator activity, RNA polymerase II transcription regulatory region sequence-specific DNA binding [GO:0001228]…		avoids bacterial lawn, clear, cytoplasmic processing body variant, early larval lethal, foraging behavior variant, gene expression level reduced, gene expression variant, gut obstructed, intestinal cell morphology variant, intestinal development variant, intestinal morphology variant, L1 arrest, larval arrest, lethal, locomotion variant, maternal sterile, mRNA levels reduced, oocyte number decrea…	lethal, sterile	anal region, AWCL, AWCR, Ea, Eal, Eala, Ealaa, Ealp, Ear, Eara, Earaa, Earp, Ep, Epl, Epla, Eplp, Eplpp, Epr, Epra, Eprp, Eprpp, head neuron, int1DL, int1DR, int1VL, int1VR, int2D, int2V, int3D, int3V, int4D, int4V, int5L, int5R, int6L, int6R, int7L, int7R, int8L, int8R, int9L, int9R, intestine, male	intestine, OLL, pharyngeal muscle cell, PVD	elt-2 encodes a GATA-type transcription factor most similar to the vertebrate GATA4-6 transcription factors required for cardiac and endoderm development (OMIM:601656, 600576); in C. elegans, ELT-2 is required redundantly with ELT-7 for initiating and maintaining terminal differentiation of the intestine and for regulating the intestinal innate immune respone; ELT-2 is expressed solely in the int…
WBGene00003958	pcp-3	F23B2.11	1.26891	3.95063e-16	2.40979	O02252	NP_501598.2	Prolyl Carboxy Peptidase like	proteolysis [GO:0006508]	dipeptidyl-peptidase activity [GO:0008239]; serine-type peptidase activity [GO:0008236]		N.A.	N.A.	N.A.	intestine	pcp-3 is an ortholog of human PRSS16 (protease, serine 16); pcp-3 is predicted to have serine-type peptidase activity, based on protein domain information.
WBGene00015455	C04G6.5	C04G6.5	1.26798	2.04188e-11	2.40824	Q17638	NP_494940.1	UPF0057 membrane protein C04G6.5	innate immune response [GO:0045087]			mitochondria alignment variant, slow growth	N.A.	N.A.	intestine, OLL, PVD	C04G6.5 is involved in innate immune response[HEP].
WBGene00009239	irld-6	F28H7.6	1.26474	1.27004e-08	2.40283	Q19893	NP_505745.1	Insulin/EGF-Receptor L Domain protein				fat content reduced	N.A.	N.A.	germ line	Microarray and RNA sequencing studies indicate that irld-6 is affected by Methylmercuric chloride, Tunicamycin, Levamisole, Zidovudine, Atrazine, Paraquat, and Sirolimus; RNA sequencing studies indicate that irld-6 is enriched in the germ line.
WBGene00006952	wrt-6	ZK377.1	1.25749	6.57391e-12	2.39079	P91573	NP_508597.2	Warthog protein 6 [Cleaved into: Warthog protein 6 N-product; Warthog protein 6 C-product]	cell-cell signaling [GO:0007267]; intein-mediated protein splicing [GO:0016539]; multicellular organism development [GO:0007275]	peptidase activity [GO:0008233]		body vacuole, intestinal vacuole, locomotion variant, molt defect, small	N.A.	AMsoL, AMsoR, hypodermis, ILsoDL, ILsoDR, ILsoL, ILsoR, ILsoVL, ILsoVR, neuronal sheath cell	ASER, hypodermis, PLM	wrt-6 encodes a hedgehog-like protein, with (from N- to C-terminus) a signal sequence, a Wart domain, an short region of low-complexity sequence, and a Hint/Hog domain; WRT-6 is expressed in sheath and socket cells of anterior sensilla, seam cells, and hypodermis; the Hint/Hog domain is predicted to cut WRT-6 into two halves and then covalently link cholesterol to the C-terminus of the Wart domai…
WBGene00010920	M117.4	M117.4	1.25362	1.77629e-05	2.38439	Q21536	NP_502238.1	Uncharacterized protein				N.A.	N.A.	N.A.	germ line, intestine, male	Microarray and RNA sequencing studies indicate that M117.4 is affected by Hydrogen sulfide, Ethanol, Methylmercuric chloride, Manganese chloride, D-glucose, and Paraquat; RNA sequencing and microarray studies indicate that M117.4 is enriched in the germ line, male, and intestine.
WBGene00014191	srt-22	ZK1037.3	1.24623	2.94944e-07	2.37221	O45985	NP_506796.1	Serpentine Receptor, class T				N.A.	N.A.	N.A.	N.A.	RNA sequencing and microarray studies indicate that srt-22 is affected by npr-1, sir-2.1, and ain-1; microarray studies indicate that srt-22 is affected by Cry5B.
WBGene00020413	T10E9.3	T10E9.3	1.22931	1.85163e-13	2.34454	O01603	NP_491882.2	Uncharacterized protein				N.A.	N.A.	N.A.	hypodermis	Microarray and RNA sequencing studies indicate that T10E9.3 is affected by Hydrogen sulfide, Nicotinic acid, Manganese chloride, Sodium arsenite, D-glucose, Neurotoxins, Resveratrol, Quercetin, single-walled carbon nanotubes, adsorbable organic bromine compounds, Allantoin, and Sirolimus; tiling array studies indicate that T10E9.3 is enriched in the hypodermis.
WBGene00014194	ZK1037.6	ZK1037.6	1.22575	4.73694e-11	2.33876	O45988	NP_506799.1	Uncharacterized protein				N.A.	N.A.	N.A.	DA neuron, VA neuron	RNA sequencing and microarray studies indicate that ZK1037.6 is affected by Rotenone, Manganese chloride, Atrazine, Cry5B, Hydrolyzable Tannins, and Humic substances; microarray studies indicate that ZK1037.6 is enriched in neurons.
WBGene00013498	Y70G10A.2	Y70G10A.2	1.22296	3.00439e-07	2.33425	Q9XWC4	NP_499266.2	Uncharacterized protein				N.A.	N.A.	N.A.	CEM, HOB, IL2 neuron, male, ray neuron type B	Tiling array, microarray, and RNA sequencing studies indicate that Y70G10A.2 is affected by rsr-2, clk-1, dop-1, dpy-21, pgl-1, pgl-3, glh-4, glh-1, emb-4, sma-2, sma-4, cox-5B, his-3, sir-2.1, and mut-2; microarray studies indicate that Y70G10A.2 is affected by adsorbable organic bromine compounds; RNA sequencing studies indicate that Y70G10A.2 is enriched in the HOB, CEM, and male and in the IL…
WBGene00007356	C06A1.6	C06A1.6	1.2206	3.39226e-05	2.33044	Q9XVX3	NP_496274.1	Uncharacterized protein				reduced brood size	N.A.	N.A.	N.A.	Tiling array, RNA sequencing, and microarray studies indicate that C06A1.6 is affected by daf-12, hpl-2, jmjd-3.1, dpy-21, daf-16, lin-22, mir-243, aak-2, tax-6, oga-1, pmk-1, and hlh-25; microarray studies indicate that C06A1.6 is affected by Neurotoxins, Testosterone, Resveratrol, Colistin, and adsorbable organic bromine compounds.
WBGene00008945	F19B2.6	F19B2.6	1.21977	1.17148e-07	2.3291	Q9XXS6	NP_507885.2	Uncharacterized protein				N.A.	N.A.	N.A.	AFD, ASER, gon_male_dtc anterior, gon_male_dtc posterior, intestine, PLM, Z1, Z1.p, Z4, Z4.a	Microarray and RNA sequencing studies indicate that F19B2.6 is affected by cyc-1, lin-15B, prg-1, wrn-1, jmjd-3.1, pgl-1, pgl-3, glh-4, glh-1, alg-1, dcr-1, and ain-2; RNA sequencing and microarray studies indicate that F19B2.6 is affected by 1-methylnicotinamide and Sirolimus; RNA sequencing studies indicate that F19B2.6 is enriched in the gon_male_dtc posterior, gon_male_dtc anterior, Z1.p, Z4.…
WBGene00003107	mab-10	R166.1	1.21966	1.48525e-13	2.32892	Q22002	NP_496268.2	Uncharacterized protein	negative regulation of transcription, DNA-templated [GO:0045892]			N.A.	bursa swollen, exploded through vulva, lethal, male fan morphology variant, protruding vulva, sterile, supernumerary molt	DTC, gonadal sheath cell, hyp7 syncytium, hypodermis, nerve ring, pharyngeal cell, pharynx, rectal epithelium, seam cell, somatic gonad, ventral nerve cord, vulval cell, vulval precursor cell	intestine, neuron, NSM, OLL, PVD	mab-10 is an ortholog of human NAB1 (NGFI-A binding protein 1) and Nab2 (NGFI-A binding protein 2); mab-10 is expressed in the pharynx, hypodermis, somatic gonad, ventral nerve cord, nerve ring, DTC, vulval precursor cell, and the vulval cell.
WBGene00016817	C50E3.6	C50E3.6	1.21676	3.48234e-10	2.32424	Q22925	NP_504958.3	Uncharacterized protein				N.A.	N.A.	N.A.	ASER, GABAergic neuron, neuron, PLM	Tiling array, RNA sequencing, and microarray studies indicate that C50E3.6 is affected by daf-16, tatn-1, bar-1, wdr-5.1, daf-2, mir-34, pgl-1, pgl-3, glh-4, glh-1, alg-2, sma-2, sma-4, lin-22, octr-1, and isp-1; microarray studies indicate that C50E3.6 is affected by Dafa#1 and Sirolimus; microarray and RNA sequencing studies indicate that C50E3.6 is enriched in neurons including the GABAergic, …
WBGene00009809	F47B8.8	F47B8.8	1.20775	7.24409e-13	2.30977	Q20521	NP_506553.1	Uncharacterized protein				N.A.	N.A.	vulva	coelomocyte, excretory cell, GABAergic neuron, hypodermis, intestine, NSM, PLM	F47B8.8 is expressed in the vulva.
WBGene00044535	K11D12.13	K11D12.13	1.20617	3.03751e-05	2.30725	Q4R127	NP_001033498.1	Uncharacterized protein		serine-type endopeptidase inhibitor activity [GO:0004867]		N.A.	N.A.	N.A.	dopaminergic neuron, germ line, hypodermis	K11D12.13 is predicted to have serine-type endopeptidase inhibitor activity, based on protein domain information.
WBGene00012822	Y43F8B.12	Y43F8B.12	1.19733	4.137e-06	2.29315	Q9XWX0	NP_507787.2	Uncharacterized protein				extended life span	N.A.	N.A.	intestine	Microarray and RNA sequencing studies indicate that Y43F8B.12 is affected by lin-15B, lin-35, eat-2, bar-1, prg-1, wrn-1, glp-1, jmjd-3.1, jmjd-1.2, mir-60, dpy-21, hrp-2, pgl-1, pgl-3, glh-4, glh-1, his-3, sir-2.1, rrf-1, and rrf-2; RNA sequencing and microarray studies indicate that Y43F8B.12 is affected by Bisphenol S and Cadmium; tiling array and RNA sequencing studies indicate that Y43F8B.12…
WBGene00020118	R155.4	R155.4	1.19278	5.28158e-05	2.28593	O01922	NP_497486.2	Nuclear Hormone Receptor family	transcription, DNA-templated [GO:0006351]	DNA binding transcription factor activity [GO:0003700]; sequence-specific DNA binding [GO:0043565]; zinc ion binding [GO:0008270]		N.A.	N.A.	N.A.	germ line	RNA sequencing studies indicate that R155.4 is affected by nhr-62, eat-2, tatn-1, csr-1, fbf-1, npr-1, jmjd-3.1, set-25, met-2, pgl-1, pgl-3, glh-4, glh-1, smg-2, and mir-71; microarray studies indicate that R155.4 is affected by Methylmercuric chloride, Resveratrol, Cadmium, and Sirolimus; RNA sequencing studies indicate that R155.4 is enriched in the germ line.
WBGene00018591	npax-2	F48B9.5	1.19238	2.56111e-09	2.28529	Q20551	NP_508396.3	N-terminal PAX (PAI domain only) protein	multicellular organism development [GO:0007275]; regulation of transcription, DNA-templated [GO:0006355]; transcription, DNA-templated [GO:0006351]	DNA binding [GO:0003677]		N.A.	N.A.	head neuron, hypodermis, vulF	germline precursor cell, hypodermis, intestine, Z1, Z4	npax-2 is a divergent Paired domain-only protein; the second part of the Paired domain (RED subdomain) is quite divergent; the Paired domain is a DNA-binding domain; npax genes mostly diverged from complete Paired domain-only and/or Paired homeobox genes; no obvious orthologs are present in arthropods or vertebrates; unlike npax-1, npax-3, and npax-4, npax-2 has both a PAI and RED subdomain, i.e.…
WBGene00020708	dmd-8	T22H9.4	1.17834	2.42547e-06	2.26317	Q9TXN8	NP_503176.2	DM (Doublesex/MAB-3) Domain family		DNA binding transcription factor activity [GO:0003700]; metal ion binding [GO:0046872]; sequence-specific DNA binding [GO:0043565]		N.A.	N.A.	amphid neuron	N.A.	dmd-8 is an ortholog of human DMRT2 (doublesex and mab-3 related transcription factor 2), DMRT3 (doublesex and mab-3 related transcription factor 3), DMRTA1 (DMRT like family A1), DMRTC1 (DMRT like family C1), DMRTC2 (DMRT like family C2), DMRT1 (doublesex and mab-3 related transcription factor 1), DMRTB1 (DMRT like family B with proline rich C-terminal 1) and DMRTA2 (DMRT like family A2); dmd-8 …
WBGene00006187	str-138	ZC513.11	1.17757	6.06871e-05	2.26196	O45981	NP_505077.1	Seven TM Receptor	olfactory behavior [GO:0042048]	G-protein coupled olfactory receptor activity [GO:0038022]		N.A.	N.A.	N.A.	N.A.	Tiling array and RNA sequencing studies indicate that str-138 is affected by rsr-2 and cox-5B; microarray studies indicate that str-138 is affected by Atrazine and Sirolimus.
WBGene00017783	F25E5.2	F25E5.2	1.16451	1.62387e-12	2.24157	O76655	NP_504917.1	Uncharacterized protein	chondroitin sulfate biosynthetic process [GO:0030206]; positive regulation of response to oxidative stress [GO:1902884]	chondroitin 4-sulfotransferase activity [GO:0047756]		N.A.	N.A.	N.A.	coelomocyte, germline precursor cell	F25E5.2 is predicted to have chondroitin 4-sulfotransferase activity, based on protein domain information.
WBGene00017108	cyp-43A1	E03E2.1	1.15721	3.87631e-14	2.23026	O17329	NP_508961.3	CYtochrome P450 family		heme binding [GO:0020037]; iron ion binding [GO:0005506]; monooxygenase activity [GO:0004497]; oxidoreductase activity [GO:0016491]; oxidoreductase activity, acting on paired donors, with incorporation or reduction of molecular oxygen [GO:0016705]		N.A.	N.A.	N.A.	intestine	cyp-43A1 is predicted to have heme binding activity, iron ion binding activity, monooxygenase activity, and oxidoreductase activity, acting on paired donors, with incorporation or reduction of molecular oxygen, based on protein domain information.
WBGene00012254	W04E12.9	W04E12.9	1.15161	7.25007e-05	2.22162	J7SA51	NP_001024186.2, NP_001263942.1	Uncharacterized protein				N.A.	N.A.	N.A.	pharyngeal muscle cell	Microarray and RNA sequencing studies indicate that W04E12.9 is affected by ubc-9, dpy-21, mir-34, hrde-1, and smg-2; microarray and RNA sequencing studies indicate that W04E12.9 is affected by Methylmercuric chloride, Multi-walled carbon nanotubes, Zidovudine, and Colistin; tiling array studies indicate that W04E12.9 is enriched in the pharyngeal muscle cell.
WBGene00004052	pme-4	H23L24.5	1.14849	3.109e-10	2.21682	Q9N5L4	NP_501496.2	Poly(ADP-ribose) glycohydrolase 2 (EC 3.2.1.143) (Poly ADP-ribose metabolism enzyme 4)	carbohydrate metabolic process [GO:0005975]; cellular response to DNA damage stimulus [GO:0006974]; nucleotide-sugar metabolic process [GO:0009225]; response to gamma radiation [GO:0010332]	poly(ADP-ribose) glycohydrolase activity [GO:0004649]		chemical hypersensitive, organism hypersensitive gamma irradiation	N.A.	head neuron, tail neuron	amphid sheath cell, CEM, HOB, IL2 neuron, ray neuron type B	parg-2 (formerly known as pme-4) encodes a poly(ADP-ribose) glycohydrolase (PARG) orthologous to human PARG (OMIM:603501) and paralogous to PARG-1; PARG-2 exhibits poly(ADP-ribose) glycohydrolase activity in vitro, and is required in vivo for normal resistance to ionizing radiation; PARG-2 is primarily expressed in the cytoplasm of nerve cells in the head and tail, and also in embryos; neuronal e…
WBGene00009077	F23B2.10	F23B2.10	1.14508	0.000102475	2.21159	O45400	NP_501597.1	Uncharacterized protein				N.A.	N.A.	N.A.	N.A.	Microarray studies indicate that F23B2.10 is affected by Resveratrol and single-walled carbon nanotubes.
WBGene00007218	C01A2.6	C01A2.6	1.14315	0.000105156	2.20862	O02210	NP_493354.2	Uncharacterized protein				N.A.	N.A.	N.A.	DA neuron, I5 neuron, retrovesicular ganglion, SAB, VA neuron	Microarray and RNA sequencing studies indicate that C01A2.6 is affected by cyc-1, nhr-114, clk-1, glp-1, daf-2, hsf-1, mir-60, pgl-1, pgl-3, glh-4, and glh-1; microarray studies indicate that C01A2.6 is enriched in the I5, DA, SAB, and retrovesicular ganglion.
WBGene00005529	sri-17	F15H9.3	1.143	4.72214e-05	2.20839	O62176	NP_493070.2	Serpentine Receptor, class I	detection of chemical stimulus involved in sensory perception [GO:0050907]			embryonic lethal	N.A.	N.A.	intestine	RNA sequencing studies indicate that sri-17 is affected by unc-75, pgl-1, pgl-3, glh-4, and glh-1; RNA sequencing studies indicate that sri-17 is enriched in the intestine.
WBGene00010072	F54F12.1	F54F12.1	1.13488	6.67561e-07	2.19601	O17889	NP_499709.1	Protein-tyrosine-phosphatase		protein tyrosine phosphatase activity [GO:0004725]		N.A.	N.A.	N.A.	germ line, male	F54F12.1 is an ortholog of human PTPRF (protein tyrosine phosphatase, receptor type F); F54F12.1 is predicted to have protein tyrosine phosphatase activity, based on protein domain information.
WBGene00015080	B0244.5	B0244.5	1.13212	2.36696e-07	2.1918	Q10909	NP_498242.3	Putative G-protein coupled receptor B0244.5		G-protein coupled receptor activity [GO:0004930]		N.A.	N.A.	N.A.	intestine	Microarray and RNA sequencing studies indicate that B0244.5 is affected by clk-1, daf-16, mir-34, ash-2, and lin-22; RNA sequencing and microarray studies indicate that B0244.5 is affected by Rotenone, Tunicamycin, Resveratrol, Cadmium, Tetrabromobisphenol A, and Sirolimus; RNA sequencing studies indicate that B0244.5 is enriched in the intestine.
WBGene00019977	fpn-1.2	R09B5.4	1.11958	5.34684e-06	2.17283	O44607	NP_503422.2	FerroPortiN		iron ion transmembrane transporter activity [GO:0005381]		N.A.	N.A.	pharynx	intestine	R09B5.4 is orthologous to the human gene HYPOTHETICAL PROTEIN (SLC11A3; OMIM:604653), which when mutated leads to disease.
WBGene00003543	nas-24	F20G2.4	1.11928	8.41956e-06	2.17238	Q93542	NP_506409.2	Zinc metalloproteinase nas-24 (EC 3.4.24.-) (Nematode astacin 24)	molting cycle, collagen and cuticulin-based cuticle [GO:0018996]	metalloendopeptidase activity [GO:0004222]; zinc ion binding [GO:0008270]		N.A.	N.A.	N.A.	germ line, male, male-specific	nas-24 encodes an astacin-like metalloprotease.
WBGene00011952	T23F6.5	T23F6.5	1.11734	1.14928e-07	2.16946	G5EFZ0	NP_502433.3	Uncharacterized protein				N.A.	N.A.	N.A.	hypodermis, OLL, PVD, Z1, Z4	RNA sequencing and microarray studies indicate that T23F6.5 is affected by prp-8, bar-1, prg-1, wrn-1, tdp-1, daf-2, dpy-21, alg-1, alg-2, emb-4, lin-22, mir-243, aak-2, crh-1, tax-6, mir-35, and pmk-1; RNA sequencing and microarray studies indicate that T23F6.5 is affected by Methylmercury hydroxide, Methylmercuric chloride, Manganese chloride, Zidovudine, Resveratrol, single-walled carbon nanot…
WBGene00022627	ZC513.2	ZC513.2	1.10734	7.62454e-07	2.15449	Q23365	NP_001309478.1	Uncharacterized protein		lipid binding [GO:0008289]		fat content increased	N.A.	N.A.	DA neuron, germ line, VA neuron	ZC513.2 is predicted to have lipid binding activity, based on protein domain information.
WBGene00019152	nspb-6	H04M03.2	1.09911	9.05303e-06	2.14223	Q9TYQ9	NP_500886.1	Nematode Specific Peptide family, group B				N.A.	N.A.	N.A.	N.A.	Microarray and RNA sequencing studies indicate that nspb-6 is affected by Hydrogen sulfide, Manganese chloride, D-glucose, Zidovudine, Quercetin, Hydrolyzable Tannins, Dafa#1, and adsorbable organic bromine compounds.
WBGene00010969	R01E6.5	R01E6.5	1.08904	0.000209679	2.12732	Q21616	NP_510263.1	Uncharacterized protein				N.A.	N.A.	spicule neuron, vulva	AVA, body wall musculature, GABAergic neuron, male, male-specific	R01E6.5 is expressed in the spicule neurons and the vulva.
WBGene00011535	T06E4.8	T06E4.8	1.08283	6.71313e-08	2.11819	Q22262	NP_505482.1	Uncharacterized protein	endoplasmic reticulum unfolded protein response [GO:0030968]			N.A.	N.A.	N.A.	arcade cell, germ line, pharyngeal-intestinal valve cell, pharynx	T06E4.8 is involved in endoplasmic reticulum unfolded protein response[HEP].
WBGene00008597	clec-55	F08H9.9	1.08246	0.000245603	2.11765	G5EDN7	NP_506591.1	C-type LECtin		carbohydrate binding [GO:0030246]		dauer lifespan extended	N.A.	N.A.	intestine	clec-55 is an ortholog of human CDCP2 (CUB domain containing protein 2); microarray, RNA sequencing, and tiling array studies indicate that clec-55 is affected by nhr-114, daf-2, mir-34, elli-1, lin-22, his-3, sir-2.1, alg-1, his-24, hpl-1, hpl-2, and let-60; microarray studies indicate that clec-55 is affected by Aldicarb, Methylmercuric chloride, Mercuric Chloride, Resveratrol, and Copper sulfa…
WBGene00044147	M163.11	M163.11	1.08051	0.000182473	2.11479	Q564X4	NP_001024810.2	Uncharacterized protein				N.A.	N.A.	N.A.	N.A.	RNA sequencing studies indicate that M163.11 is affected by let-418, chd-3, pgl-1, pgl-3, glh-4, and glh-1.
WBGene00020243	T05B4.12	T05B4.12	1.07908	0.000255055	2.11268	O16421	NP_504149.1	Uncharacterized protein				N.A.	N.A.	N.A.	cephalic sheath cell, dopaminergic neuron, pharynx	Microarray, tiling array, and RNA sequencing studies indicate that T05B4.12 is affected by cyc-1, hpl-2, jmjd-3.1, jmjd-1.2, dpy-21, mir-34, ain-1, cdk-4, cyd-1, and ogt-1; microarray studies indicate that T05B4.12 is affected by Hydrogen sulfide, Fluoranthene, Dibromoacetic acid, and Tetrabromobisphenol A; microarray and tiling array studies indicate that T05B4.12 is enriched in the pharynx and …
WBGene00018262	cyp-33C3	F41B5.4	1.0764	4.39806e-08	2.10877	O16670	NP_503615.1	CYtochrome P450 family		heme binding [GO:0020037]; iron ion binding [GO:0005506]; oxidoreductase activity, acting on paired donors, with incorporation or reduction of molecular oxygen [GO:0016705]; steroid hydroxylase activity [GO:0008395]		cadmium hypersensitive, short defecation cycle, slow growth, transgene expression reduced	N.A.	N.A.	coelomocyte, intestine, pharynx	cyp-33C3 is an ortholog of human CYP2J2 (cytochrome P450 family 2 subfamily J member 2), CYP2U1 (cytochrome P450 family 2 subfamily U member 1) and CYP2R1 (cytochrome P450 family 2 subfamily R member 1); cyp-33C3 is predicted to have heme binding activity, iron ion binding activity, and oxidoreductase activity, acting on paired donors, with incorporation or reduction of molecular oxygen, based on…
WBGene00005291	srh-70	T21B4.9	1.07638	2.24551e-06	2.10873	O18104	NP_496673.1	Serpentine Receptor, class H	detection of chemical stimulus involved in sensory perception [GO:0050907]			N.A.	N.A.	N.A.	AFD, DA neuron, I5 neuron, intestine, muscle cell, NSM, retrovesicular ganglion, SAB, VA neuron	Microarray and RNA sequencing studies indicate that srh-70 is affected by ubc-9, npr-1, hsf-1, rbr-2, dpy-21, daf-16, ash-2, mir-71, cox-5B, sir-2.1, tax-6, isp-1, nuo-6, and let-60; microarray and RNA sequencing studies indicate that srh-70 is affected by Mercuric Chloride, Tunicamycin, Multi-walled carbon nanotubes, Cry5B, and adsorbable organic bromine compounds; tiling array, RNA sequencing, …
WBGene00016665	C45E5.2	C45E5.2	1.06448	0.000307662	2.09141	Q18644	NP_500856.2	CHItinase-Like	carbohydrate metabolic process [GO:0005975]; chitin catabolic process [GO:0006032]	chitinase activity [GO:0004568]; chitin binding [GO:0008061]		avoids bacterial lawn, RAB-11 recycling endosome localization variant, transgene subcellular localization variant	N.A.	N.A.	N.A.	chil-11 is predicted to have chitin binding activity, based on protein domain information.
WBGene00003057	lon-3	ZK836.1	1.05923	5.46711e-11	2.08382	Q23628	NP_506061.1	collagen	body morphogenesis [GO:0010171]; negative regulation of multicellular organism growth [GO:0040015]	structural constituent of collagen and cuticulin-based cuticle [GO:0042329]		long	alae morphology variant, annulae morphology variant, long, pattern of transgene expression variant	cuticle, H0L, H0R, H1L, H1L.a, H1L.aa, H1L.ap, H1L.app, H1L.appp, H1R, H1R.a, H1R.aa, H1R.ap, H1R.app, H1R.appp, H2L, H2L.a, H2L.p, H2L.pp, H2L.ppp, H2L.pppp, H2R, H2R.a, H2R.p, H2R.pp, H2R.ppp, H2R.pppp, hyp5, hyp6, hyp7, hyp7 syncytium, hyp8, hyp9, hyp10, hyp11, hypodermis	OLL, PLM, PVD	lon-3 is an ortholog of human COLQ (collagen like tail subunit of asymmetric acetylcholinesterase); lon-3 is involved in body morphogenesis and negative regulation of growth; lon-3 is a structural constituent of collagen and cuticulin-based cuticle, based on sequence information; lon-3 is expressed in the hyp7, hypodermis, cuticle, H1L.a, H1L.ap, H1L.app, H1R.a, H1R.ap, H1R.app, H2L.a, H2L.p, H2L…
WBGene00000723	col-150	B0024.2	1.05286	7.00733e-08	2.07464	Q17418	NP_505647.1	COLlagen		structural constituent of cuticle [GO:0042302]		Bacillus thuringiensis toxin hypersensitive, pore forming toxin hypersensitive	lethal, sterile	N.A.	hypodermis	col-150 is an ortholog of human SFTPD (surfactant protein D); col-150 is a structural constituent of cuticle, based on protein domain information.
WBGene00007536	daf-36	C12D8.5	1.03687	8.48417e-11	2.05177	Q17938	NP_505629.2	Cholesterol 7-desaturase (EC 1.14.19.21) (Cholesterol desaturase daf-36)	cholesterol metabolic process [GO:0008203]	2 iron, 2 sulfur cluster binding [GO:0051537]; metal ion binding [GO:0046872]; oxidoreductase activity [GO:0016491]		N.A.	dauer arrest variant, developmental delay postembryonic, transgene expression increased	hmc, intestine, neuron, seam cell	intestine	daf-36 encodes a protein homologous to the catalytic subunit of Rieske-like oxygenases; DAF-36 functions in a hormone biosynthetic pathway producing a ligand for the DAF-12 nuclear receptor that regulates the developmental decision between reproductive growth and dauer formation; a daf-36::gfp reporter fusion is expressed in the intestine, the head mesodermal cell, two unidentified head neurons (…
WBGene00012346	W08G11.1	W08G11.1	1.03374	5.85555e-10	2.04733	Q7YTW2	NP_507132.2	Uncharacterized protein				N.A.	N.A.	N.A.	hypodermis	RNA sequencing and microarray studies indicate that W08G11.1 is affected by Methylmercury hydroxide, Methylmercuric chloride, D-glucose, Sesamin, Zidovudine, Selenium, Colistin, and Sirolimus; tiling array studies indicate that W08G11.1 is enriched in the hypodermis.
WBGene00017819	F26D11.2	F26D11.2	1.02284	0.000515742	2.03192	O61965	NP_505049.1	Uncharacterized protein				N.A.	N.A.	N.A.	intestine	RNA sequencing and microarray studies indicate that F26D11.2 is affected by Methylmercury hydroxide, Methylmercuric chloride, Tunicamycin, D-glucose, Resveratrol, Cadmium, Quercetin, single-walled carbon nanotubes, and Sirolimus; microarray studies indicate that F26D11.2 is enriched in the intestine.
WBGene00007275	C03D6.1	C03D6.1	1.01853	1.03468e-05	2.02586	Q17600	NP_492571.1	Uncharacterized protein		nucleic acid binding [GO:0003676]		dumpy, embryonic lethal, growth variant, larval arrest, maternal sterile, pattern of transgene expression variant, protruding vulva, receptor mediated endocytosis defective, slow growth, sterile progeny	lethal, sterile	hypodermis, intestine, tail	hypodermis, intestine, OLL, PVD	C03D6.1 is predicted to have nucleic acid binding activity, based on protein domain information; C03D6.1 is expressed in the hypodermis, tail, and the intestine.
WBGene00008277	mltn-12	C53B4.8	1.01786	7.3749e-09	2.02491	G5EG70	NP_001040930.2	MLt-TeN (Mlt-10) related				no induction of antimicrobial peptide expression after infection	N.A.	N.A.	hypodermis, intestine	RNA sequencing and microarray studies indicate that mltn-12 is affected by Methylmercury hydroxide, Tunicamycin, Multi-walled carbon nanotubes, Zidovudine, Selenium, Colistin, and Sirolimus; tiling array and microarray studies indicate that mltn-12 is enriched in the hypodermis and intestine.
WBGene00021908	Y55B1AR.4	Y55B1AR.4	1.01524	0.000287059	2.02124	Q9N382	NP_497217.1	Uncharacterized protein				N.A.	N.A.	N.A.	male	Microarray and RNA sequencing studies indicate that Y55B1AR.4 is affected by Methylmercuric chloride, Manganese chloride, D-glucose, Atrazine, Chlorpyrifos, Diazinon, Quercetin, Hydrolyzable Tannins, Paraquat, Tetrabromobisphenol A, adsorbable organic bromine compounds, Sirolimus, and Triclosan; RNA sequencing studies indicate that Y55B1AR.4 is enriched in the male.
WBGene00006229	str-187	F26D10.8	1.01348	0.000596849	2.01878	Q9XVU0	NP_503063.1	Seven TM Receptor	olfactory behavior [GO:0042048]	G-protein coupled olfactory receptor activity [GO:0038022]		dauer lifespan extended	N.A.	N.A.	N.A.	Tiling array, microarray, and RNA sequencing studies indicate that str-187 is affected by daf-12, clk-1, mir-34, and lin-22.
WBGene00219754	linc-85	Y47D9A.6	1.01069	0.000405628	2.01488	U4PAV0	N.A.	ncRNA				N.A.	N.A.	N.A.	N.A.	RNA sequencing studies indicate that linc-85 is affected by cep-1 and smg-2.
WBGene00015223	B0507.6	B0507.6	1.01038	0.000609203	2.01444	E3W720	NP_505253.2	Uncharacterized protein				dauer lifespan extended	N.A.	N.A.	body wall muscle cell, cephalic sheath cell, dopaminergic neuron, intestine	Microarray studies indicate that B0507.6 is affected by Atrazine, Cadmium, Fluoranthene, Quercetin, and Sirolimus; tiling array and RNA sequencing studies indicate that B0507.6 is enriched in the body wall muscle cell, cephalic sheath cell, and intestine and in the dopaminergic neurons.
WBGene00015395	nhr-147	C03G6.8	1.01005	5.59332e-06	2.01399	O01448	NP_504873.2	Nuclear Hormone Receptor family	transcription, DNA-templated [GO:0006351]	DNA binding transcription factor activity [GO:0003700]; sequence-specific DNA binding [GO:0043565]; zinc ion binding [GO:0008270]		dauer lifespan extended, transgene expression reduced	N.A.	N.A.	germ line, hypodermis	nhr-147 is an ortholog of human HNF4A (hepatocyte nuclear factor 4 alpha) and HNF4G (hepatocyte nuclear factor 4 gamma); nhr-147 is predicted to have DNA-binding transcription factor activity, sequence-specific DNA binding activity, and zinc ion binding activity, based on protein domain information.
WBGene00013966	ztf-9	ZK287.6	1.0087	2.75667e-10	2.0121	Q23458	NP_505497.1	Zinc finger putative Transcription Factor family		nucleic acid binding [GO:0003676]		N.A.	N.A.	N.A.	AFD, germ line, neuron, NSM	ztf-9 is predicted to have nucleic acid binding activity, based on protein domain information.
WBGene00020613	T20D4.7	T20D4.7	1.00832	6.17888e-05	2.01156	P91468	NP_503954.2	Uncharacterized protein	cell redox homeostasis [GO:0045454]	thioredoxin-disulfide reductase activity [GO:0004791]		N.A.	N.A.	N.A.	body wall muscle cell, hypodermis, muscle cell, Z1, Z4	T20D4.7 is an ortholog of human NXNL1 (nucleoredoxin-like 1) and NXNL2 (nucleoredoxin-like 2); microarray and RNA sequencing studies indicate that T20D4.7 is affected by Aldicarb, Multi-walled carbon nanotubes, Procyanidin, Zidovudine, and Diazinon; tiling array and RNA sequencing studies indicate that T20D4.7 is enriched in the body wall muscle cell, hypodermis, Z4, Z1, and muscle cell.
WBGene00012514	Y26E6A.3	Y26E6A.3	1.0056	7.01384e-07	2.00778	Q7YWR7	NP_001024956.1	Uncharacterized protein				N.A.	N.A.	N.A.	amphid sheath cell, excretory cell, GABAergic neuron	Y26E6A.3 is an ortholog of human C16orf13; RNA sequencing studies indicate that Y26E6A.3 is affected by Rotenone and Manganese chloride; tiling array and RNA sequencing studies indicate that Y26E6A.3 is enriched in the excretory cell and amphid sheath cell and in the GABAergic neurons.
WBGene00011063	cpg-3	R06C7.4	1.00121	9.65627e-06	2.00168	Q21771	NP_492047.1	Chondroitin proteoglycan 3				N.A.	N.A.	germ line	germ line, hermaphrodite-specific, pharyngeal muscle cell, Psub1	cgp-3 encodes a putatively secreted protein with an N-terminal low-complexity domain containing 15 potential chondroitin attachment sites, and a C-terminal EGF-like region; cpg-3 mRNA is enriched in oogenesis, but CPG-3 has no obvious function in mass RNAi assays.
WBGene00000755	col-182	R09A8.4	0.996351	2.65994e-12	1.99495	Q21855	NP_510110.2	COLlagen		structural constituent of cuticle [GO:0042302]		hyperinduction of antimicrobial peptide expression after infection	N.A.	N.A.	hypodermis, intestine, PLM	col-182 is an ortholog of human ADIPOQ (adiponectin, C1Q and collagen domain containing) and members of the C1QTNF (C1q and TNF related) family including C1QTNF9B; col-182 is a structural constituent of cuticle, based on protein domain information.
WBGene00015546	C06G1.2	C06G1.2	0.996207	1.8255e-06	1.99475	Q17742	NP_510688.1	Uncharacterized protein				N.A.	N.A.	N.A.	DA neuron, pharynx, VA neuron	Microarray and RNA sequencing studies indicate that C06G1.2 is affected by Hydrogen sulfide, Methylmercuric chloride, Multi-walled carbon nanotubes, D-glucose, Zidovudine, Resveratrol, Atrazine, single-walled carbon nanotubes, Colistin, and Sirolimus; microarray studies indicate that C06G1.2 is enriched in the pharynx and in the DA neurons.
WBGene00008579	F08G2.8	F08G2.8	0.99551	3.97474e-09	1.99378	Q9XVA0	NP_496904.1	Uncharacterized protein				larval arrest	N.A.	N.A.	N.A.	RNA sequencing and microarray studies indicate that F08G2.8 is affected by D-glucose, Zidovudine, and Atrazine.
WBGene00003588	nex-1	ZC155.1	0.989402	3.48765e-16	1.98536	G5EEA8	NP_498109.1	Annexin	engulfment of apoptotic cell [GO:0043652]	1-phosphatidylinositol binding [GO:0005545]; calcium-dependent phospholipid binding [GO:0005544]; calcium ion binding [GO:0005509]; heparin binding [GO:0008201]; phosphatidylethanolamine binding [GO:0008429]; phosphatidylserine binding [GO:0001786]		cell development variant, engulfment variant, organism development variant	N.A.	hypodermis, pharynx, spermathecal-uterine junction, uterine toroidal epithelial cell, vulva	AFD, ASER, DA neuron, excretory cell, GABAergic neuron, germ line, germline precursor cell, I5 neuron, neuron, retrovesicular ganglion, SAB, VA neuron	nex-1 encodes an annexin, a member of a family of calcium-dependent phospholipid binding proteins; NEX-1 is required for efficient engulfment of apoptotic cell corpses in the pharynx, and may also function in other membrane fusion events, such as exocytosis; NEX-1 in vitro can bind phosphatidylserine, phosphatidylinositol, heparin, heparan sulfate, and chondroitin sulfate; NEX-1 is expressed in t…
WBGene00018178	F38E1.3	F38E1.3	0.989	0.000118354	1.98481	Q20160	NP_505159.1	Uncharacterized protein	peptidyl-serine phosphorylation [GO:0018105]; regulation of cell shape [GO:0008360]	ATP binding [GO:0005524]; protein serine/threonine kinase activity [GO:0004674]		N.A.	lethal, sterile	N.A.	male	F38E1.3 is an ortholog of human TTBK1 (tau tubulin kinase 1), CTD-2116N17.1 and TTBK2 (tau tubulin kinase 2); F38E1.3 is predicted to have ATP binding activity and protein kinase activity, based on protein domain information.
WBGene00010136	F55H12.5	F55H12.5	0.987628	0.000642902	1.98292	Q8I4I0	NP_492395.2	Uncharacterized protein		protein tyrosine phosphatase activity [GO:0004725]		N.A.	N.A.	N.A.	germ line, hypodermis, male	F55H12.5 is predicted to have protein tyrosine phosphatase activity, based on protein domain information.
WBGene00000683	col-109	Y38C1BA.3	0.984731	1.96002e-09	1.97894	Q9N527	NP_500138.1	COLlagen	endoplasmic reticulum unfolded protein response [GO:0030968]	structural constituent of cuticle [GO:0042302]		N.A.	N.A.	N.A.	DA neuron, germline precursor cell, intestine, VA neuron	col-109 encodes a cuticular collagen; loss of col-109 via large-scale RNAi screens results in no obvious defects.
WBGene00007341	C05D12.4	C05D12.4	0.977619	0.000175645	1.96921	Q17658	NP_496434.1	Uncharacterized protein				N.A.	N.A.	N.A.	intestine, OLL, PVD	RNA sequencing and microarray studies indicate that C05D12.4 is affected by 1-methylnicotinamide, Methylmercuric chloride, Rotenone, Fluoranthene, Cry5B, Chlorpyrifos, Diazinon, and Triclosan; microarray and RNA sequencing studies indicate that C05D12.4 is enriched in the intestine and in the PVD and OLL neurons.
WBGene00000666	col-91	F09G8.6	0.967315	2.0717e-06	1.9552	P34391	NP_498814.1	Putative cuticle collagen 91		structural constituent of cuticle [GO:0042302]		transgene subcellular localization variant	N.A.	N.A.	hypodermis	col-91 encodes a cuticle collagen; loss of col-91 via large-scale RNAi results in no obvious defects.
WBGene00012185	W01F3.2	W01F3.2	0.958465	5.84396e-07	1.94324	O62390	NP_507992.1	Uncharacterized protein				N.A.	N.A.	N.A.	germline precursor cell, hypodermis	W01F3.2 is an ortholog of human Mmp2 (matrix metallopeptidase 2) and Mmp1 (matrix metallopeptidase 1) and members of the MMP (M10 matrix metallopeptidases) family including MMP16; RNA sequencing and microarray studies indicate that W01F3.2 is affected by 1-methylnicotinamide, Manganese chloride, Sodium arsenite, D-glucose, Cry5B, Humic substances, R24, single-walled carbon nanotubes, Dafa#1, and …
WBGene00019968	R08F11.4	R08F11.4	0.956933	2.05167e-05	1.94118	O01889	NP_504052.1	Uncharacterized protein	methylation [GO:0032259]	S-adenosylmethionine-dependent methyltransferase activity [GO:0008757]		N.A.	N.A.	N.A.	ASER	Microarray and RNA sequencing studies indicate that R08F11.4 is affected by Hydrogen sulfide, 1-methylnicotinamide, Methylmercuric chloride, Sodium arsenite, D-glucose, Juglone, TPEN, Quercetin, Humic substances, Paraquat, Sirolimus, and Ag nanoparticles; RNA sequencing studies indicate that R08F11.4 is enriched in the ASER neurons.
WBGene00016884	C52E2.5	C52E2.5	0.956043	0.000820542	1.93998	Q9N4L1	NP_494091.1	Uncharacterized protein				N.A.	N.A.	N.A.	intestine	Microarray and RNA sequencing studies indicate that C52E2.5 is affected by daf-16, eat-2, emr-1, lem-2, daf-2, jmjd-3.1, hsf-1, dpy-21, pgl-1, pgl-3, glh-4, glh-1, sma-4, lin-22, smg-2, eri-1, mut-2, and ain-1; RNA sequencing studies indicate that C52E2.5 is affected by Zidovudine; tiling array and RNA sequencing studies indicate that C52E2.5 is enriched in the intestine.
WBGene00012518	comt-2	Y32B12A.3	0.955915	0.00111619	1.93981	Q9XXH0	NP_507175.2	Catechol-O-MethylTransferase family	innate immune response [GO:0045087]	O-methyltransferase activity [GO:0008171]		N.A.	N.A.	N.A.	intestine	comt-2 is an ortholog of human COMTD1 (catechol-O-methyltransferase domain containing 1); comt-2 is involved in innate immune response[HEP]; comt-2 is predicted to have O-methyltransferase activity, based on protein domain information.
WBGene00010501	K02C4.2	K02C4.2	0.955479	9.02046e-06	1.93922	Q09403	NP_871959.2	Uncharacterized protein				N.A.	N.A.	N.A.	dopaminergic neuron, OLL, PVD	Microarray, tiling array, and RNA sequencing studies indicate that K02C4.2 is affected by sma-2, daf-12, tdp-1, daf-2, csr-1, npr-1, jmjd-3.1, mir-34, daf-16, dpy-21, pgl-1, pgl-3, glh-4, glh-1, alg-1, mir-243, ogt-1, and pmk-1; microarray studies indicate that K02C4.2 is affected by Quercetin and Sirolimus; microarray and tiling array studies indicate that K02C4.2 is enriched in the PVD, OLL, an…
WBGene00021741	Y50D4B.2	Y50D4B.2	0.948219	0.000169126	1.92949	A0A0K3AVC7	NP_001300266.1, NP_503379.3	Uncharacterized protein				N.A.	N.A.	N.A.	AFD, hypodermis, neuron, RID	Y50D4B.2 is an ortholog of human SCCPDH (saccharopine dehydrogenase (putative)); microarray and RNA sequencing studies indicate that Y50D4B.2 is affected by bar-1, pgl-1, pgl-3, glh-4, glh-1, daf-2, daf-16, let-418, chd-3, dpy-21, mir-34, unc-39, lin-22, ahr-1, mir-243, lin-54, and nhr-25; microarray and RNA sequencing studies indicate that Y50D4B.2 is affected by Aldicarb, 1-methylnicotinamide, …
WBGene00001806	gur-5	ZK622.2	0.945667	0.000777407	1.92608	Q23553	NP_494992.2	GUstatory Receptor family				N.A.	N.A.	N.A.	amphid sheath cell, cephalic sheath cell	Microarray and RNA sequencing studies indicate that gur-5 is affected by cyc-1, clk-1, ash-2, daf-2, ham-3, jmjd-3.1, jmjd-1.2, dop-1, dpy-21, daf-12, daf-16, hcf-1, and sir-2.1; microarray studies indicate that gur-5 is affected by Tunicamycin; tiling array and RNA sequencing studies indicate that gur-5 is enriched in the cephalic sheath cell and amphid sheath cell.
WBGene00016551	C40A11.8	C40A11.8	0.939686	0.001409	1.91811	Q9TZA5	NP_494200.3	Uncharacterized protein				N.A.	N.A.	N.A.	DA neuron, I5 neuron, retrovesicular ganglion, SAB, VA neuron	Microarray and RNA sequencing studies indicate that C40A11.8 is affected by Hydrogen sulfide, Methylmercuric chloride, Rotenone, and Bisphenol S; microarray studies indicate that C40A11.8 is enriched in the I5, DA, SAB, and retrovesicular ganglion.
WBGene00013905	ugt-4	ZC455.5	0.935911	0.00128912	1.9131	Q23335	NP_001041203.1	UDP-glucuronosyltransferase (EC 2.4.1.17)	metabolic process [GO:0008152]	glucuronosyltransferase activity [GO:0015020]		N.A.	N.A.	N.A.	dopaminergic neuron, intestine, pharyngeal muscle cell	ugt-4 is an ortholog of human UGT3A2 (UDP glycosyltransferase family 3 member A2) and UGT3A1 (UDP glycosyltransferase family 3 member A1); ugt-4 is predicted to have transferase activity, transferring hexosyl groups, based on protein domain information.
WBGene00020459	fbxa-23	T12B5.13	0.934756	0.000353348	1.91157	Q9TZ25	NP_497301.2	F-box A protein				N.A.	N.A.	N.A.	N.A.	Microarray and RNA sequencing studies indicate that fbxa-23 is affected by age-1, mir-34, pgl-1, pgl-3, glh-4, glh-1, sir-2.1, lin-14, and lin-4.
WBGene00019917	clec-43	R07C3.1	0.933412	8.72039e-06	1.90979	O16778	NP_493859.2	C-type LECtin		carbohydrate binding [GO:0030246]		N.A.	N.A.	N.A.	dopaminergic neuron, intestine, NSM	Microarray and RNA sequencing studies indicate that clec-43 is affected by Methylmercuric chloride, Rotenone, Tunicamycin, Multi-walled carbon nanotubes, Bisphenol A, Bisphenol S, Resveratrol, Colistin, and Triclosan; tiling array and RNA sequencing studies indicate that clec-43 is enriched in the intestine and in the dopaminergic and NSM neurons.
WBGene00012329	sre-44	W07G1.2	0.929997	0.00148587	1.90527	Q9XUK3	NP_496918.1	Serpentine Receptor, class E (Epsilon)	sensory perception of chemical stimulus [GO:0007606]			reduced brood size	N.A.	amphid neuron, head neuron, intestine, nervous system	N.A.	sre-44 is expressed in the nervous system and the intestine.
WBGene00010821	M01G12.7	M01G12.7	0.92827	0.000509289	1.90299	O62313	NP_493060.1	Uncharacterized protein				N.A.	N.A.	N.A.	coelomocyte, DA neuron, VA neuron	Microarray, tiling array, and RNA sequencing studies indicate that M01G12.7 is affected by lin-15B, lin-35, hpl-2, clk-1, dpy-21, mir-34, hrp-2, pgl-1, pgl-3, glh-4, glh-1, his-24, and hpl-1; microarray studies indicate that M01G12.7 is affected by Methylmercuric chloride, Diazinon, Chlorpyrifos, and Sirolimus; tiling array studies indicate that M01G12.7 is enriched in the coelomocytes and in the…
WBGene00005444	srh-237	T05E12.7	0.926019	0.000438755	1.90003	J7SA46	NP_001263910.2, NP_001263911.1	Serpentine Receptor, class H	detection of chemical stimulus involved in sensory perception [GO:0050907]			N.A.	N.A.	N.A.	intestine	Microarray and RNA sequencing studies indicate that srh-237 is affected by daf-12, cyc-1, isp-1, eat-2, clk-1, daf-2, ham-3, swsn-2.2, npr-1, hsf-1, rbr-2, let-418, chd-3, ash-2, sma-2, mir-71, sir-2.1, daf-16, daf-19, and nhr-25; microarray and RNA sequencing studies indicate that srh-237 is affected by Diallyl trisulfide, Rotenone, Zidovudine, Cry5B, Humic substances, Colistin, and Sirolimus; R…
WBGene00044754	Y119C1B.12	Y119C1B.12	0.920775	0.00167786	1.89313	Q2AAC4	NP_001040699.1	Uncharacterized protein				N.A.	N.A.	N.A.	N.A.	Microarray and RNA sequencing studies indicate that Y119C1B.12 is affected by nhr-114, clk-1, npr-1, dpy-21, and mir-34; RNA sequencing and microarray studies indicate that Y119C1B.12 is affected by Multi-walled carbon nanotubes and Colistin.
WBGene00008507	F01G10.4	F01G10.4	0.920637	0.00107547	1.89295	O17765	NP_501874.3	Uncharacterized protein				N.A.	N.A.	N.A.	N.A.	Microarray and RNA sequencing studies indicate that F01G10.4 is affected by lin-15B, lin-35, daf-2, rsks-1, bar-1, hsf-1, dpy-21, mir-34, smg-2, mut-2, his-24, hpl-1, and hpl-2; microarray studies indicate that F01G10.4 is affected by Indole.
WBGene00004124	pqn-37	F40F4.8	0.919265	6.54082e-11	1.89115	Q95ZT9	NP_508554.3	Prion-like-(Q/N-rich)-domain-bearing protein				N.A.	N.A.	N.A.	hypodermis	The protein product of this gene is predicted to contain a glutamine/asparagine (Q/N)-rich ('prion') domain, by the algorithm of Michelitsch and Weissman (as of the WS77 release of WormBase, i.e., in wormpep77).
WBGene00013956	ZK265.3	ZK265.3	0.916697	0.00126795	1.88779	Q94401	NP_492244.1	Uncharacterized protein				N.A.	N.A.	N.A.	amphid sheath cell, male, NSM	RNA sequencing and microarray studies indicate that ZK265.3 is affected by Ethanol, Nicotinic acid, Methylmercuric chloride, Rotenone, Manganese chloride, D-glucose, Acrylamide, Cadmium, Quercetin, Hydrolyzable Tannins, Humic substances, Paraquat, Colistin, adsorbable organic bromine compounds, and Triclosan; tiling array and RNA sequencing studies indicate that ZK265.3 is enriched in the amphid …
WBGene00016731	C46H11.7	C46H11.7	0.916255	3.67576e-05	1.88721	Q9GYJ4	NP_491507.2	Uncharacterized protein				transgene expression reduced	N.A.	N.A.	intestine	RNA sequencing and microarray studies indicate that C46H11.7 is affected by Zidovudine, Diazinon, Hydrolyzable Tannins, Colistin, and Sirolimus; RNA sequencing studies indicate that C46H11.7 is enriched in the intestine.
WBGene00008591	F08H9.3	F08H9.3	0.913371	0.00165237	1.88344	Q19227	NP_506585.1	Uncharacterized protein				organism pathogen response variant, pathogen susceptibility increased, thermotolerance reduced	organism hypersensitive desiccation	pharynx	ASER, germ line	F08H9.3 encodes a heat shock protein (HSP) of the HSP16 class; unlike most HSP16s in C. elegans, it is specifically expressed in a particular tissue (the larval pharynx and the anterior adult pharynx), and its expression is not strongly induced by heat shock; however, F08H9.3 expression is increased by heat shock (with adult expression in the full pharynx) and probably aids heat shock resistance,…
WBGene00022856	cth-2	ZK1127.10	0.911299	7.68496e-12	1.88074	P55216	NP_495449.1	Putative cystathionine gamma-lyase 2 (EC 4.4.1.1) (Gamma-cystathionase)	'de novo' L-methionine biosynthetic process [GO:0071266]; cysteine biosynthetic process via cystathionine [GO:0019343]; transsulfuration [GO:0019346]	cystathionine gamma-lyase activity [GO:0004123]; cystathionine gamma-synthase activity [GO:0003962]; L-cysteine desulfhydrase activity [GO:0080146]; L-cystine L-cysteine-lyase (deaminating) [GO:0044540]; pyridoxal phosphate binding [GO:0030170]		ectopic expression transgene, germline transgene silencing variant, larval lethal, multivulva, RNAi resistant, somatic transgene silencing variant, transgene expression increased	N.A.	anal depressor muscle, body wall musculature, hypodermis, reproductive system, vulval muscle	anal depressor muscle, body wall musculature, germline precursor cell, intestine, muscle cell, neuron, pharynx, PLM, vulval muscle	cth-2 encodes a putative cystathionine gamma-lyase; CTH-2 is orthologous to human CTH (OMIM:607657, mutated in cystathioninuria), extremely similar to its paralog CTH-1, and also paralogous to CBL-1; either CTH-2, or CTH-1, or both proteins weakly inhibit DHC-1 in vivo; CTH-2 is expressed in both larval and adult hypodermis, anal depressor muscle, and body wall muscle, as well as in adult vulval …
WBGene00018789	F54C1.1	F54C1.1	0.909629	3.16944e-05	1.87856	P91326	NP_491499.1	Uncharacterized protein	metabolic process [GO:0008152]	glucuronosyltransferase activity [GO:0015020]		N.A.	N.A.	N.A.	N.A.	F54C1.1 is predicted to have transferase activity, transferring hexosyl groups, based on protein domain information.
WBGene00219746	linc-91	W09C3.9	0.907925	0.00127341	1.87634	J7SEY7	N.A.	ncRNA				N.A.	N.A.	N.A.	N.A.	RNA sequencing studies indicate that linc-91 is affected by cep-1 and smg-2.
WBGene00012070	T26H5.8	T26H5.8	0.907421	0.00124201	1.87569	G5EG98	NP_506839.3	Uncharacterized protein	carbohydrate metabolic process [GO:0005975]; macromolecule glycosylation [GO:0043413]	galactoside 2-alpha-L-fucosyltransferase activity [GO:0008107]; transferase activity, transferring glycosyl groups [GO:0016757]		N.A.	N.A.	N.A.	intestine, PLM	T26H5.8 is predicted to have galactoside 2-alpha-L-fucosyltransferase activity, based on protein domain information.
WBGene00007410	C07B5.6	C07B5.6	0.905323	0.00125377	1.87296	O62038	NP_509601.1	Uncharacterized protein				N.A.	N.A.	N.A.	gon_male_dtc anterior, gon_male_dtc posterior, Z1, Z1.p, Z4, Z4.a	Tiling array, RNA sequencing, and microarray studies indicate that C07B5.6 is affected by rsr-2, daf-2, daf-16, and mir-34; RNA sequencing and microarray studies indicate that C07B5.6 is affected by Multi-walled carbon nanotubes and Allantoin; RNA sequencing studies indicate that C07B5.6 is enriched in the gon_male_dtc posterior, gon_male_dtc anterior, Z1.p, Z4.a, Z4, and Z1.
WBGene00021576	fbxc-51	Y46B2A.1	0.904151	0.00143291	1.87144	Q9N4X2	NP_493836.1	F-box C protein				N.A.	N.A.	N.A.	gon_male_dtc anterior, gon_male_dtc posterior, intestine, Z1, Z1.p, Z4, Z4.a	Microarray and RNA sequencing studies indicate that fbxc-51 is affected by Hydrogen sulfide, 1-methylnicotinamide, Methylmercuric chloride, D-glucose, Bisphenol A, Bisphenol S, Zidovudine, Resveratrol, Quercetin, Paraquat, adsorbable organic bromine compounds, Sirolimus, and Octopamine; tiling array and RNA sequencing studies indicate that fbxc-51 is enriched in the intestine, gon_male_dtc poster…
WBGene00007869	C32H11.6	C32H11.6	0.901836	0.00139736	1.86844	Q9XUH5	NP_502468.1	Uncharacterized protein				extended life span, mitochondrial membrane potential reduced	N.A.	N.A.	hypodermis	Microarray and RNA sequencing studies indicate that C32H11.6 is affected by lin-15B, blmp-1, bar-1, ubc-9, clk-1, tdp-1, dpy-21, daf-12, daf-16, lin-22, cox-5B, sir-2.1, lin-14, lin-4, mir-243, crh-1, and pmk-1; microarray and RNA sequencing studies indicate that C32H11.6 is affected by Tunicamycin, D-glucose, Atrazine, Chlorpyrifos, and Diazinon; tiling array studies indicate that C32H11.6 is en…
WBGene00201153	C44B7.20	C44B7.20	0.899108	0.00216183	1.86491	E2JKZ9	N.A.	ncRNA				N.A.	N.A.	N.A.	N.A.
WBGene00019660	K11H12.4	K11H12.4	0.898109	1.44163e-05	1.86362	P91369	NP_499969.1	Uncharacterized protein	innate immune response [GO:0045087]			N.A.	N.A.	N.A.	intestine, neuron, OLL, pharyngeal muscle cell, PVD	Microarray and RNA sequencing studies indicate that K11H12.4 is affected by Heme, Diallyl trisulfide, Hydrogen sulfide, Copper sulfate, Rotenone, Tunicamycin, D-glucose, Zidovudine, Resveratrol, Chlorpyrifos, Diazinon, Cry5B, Humic substances, Paraquat, Dafa#1, Sirolimus, and Ag nanoparticles; microarray, tiling array, and RNA sequencing studies indicate that K11H12.4 is enriched in the intestine…
WBGene00009879	F49C12.10	F49C12.10	0.8979	3.00324e-06	1.86335	Q20587	NP_501633.1	Uncharacterized protein	methylation [GO:0032259]	S-adenosylmethionine-dependent methyltransferase activity [GO:0008757]		N.A.	N.A.	N.A.	N.A.	F49C12.10 is predicted to have methyltransferase activity, based on protein domain information.
WBGene00005227	srh-1	T11F9.18	0.897566	0.00226624	1.86292	Q7YXA5	NP_001024135.2	Serpentine Receptor, class H	detection of chemical stimulus involved in sensory perception [GO:0050907]			N.A.	N.A.	N.A.	N.A.	Tiling array, RNA sequencing, and microarray studies indicate that srh-1 is affected by rsr-2, hrde-1, pgl-1, pgl-3, glh-4, glh-1, cox-5B, and acs-3.
WBGene00017089	poml-2	E01A2.7	0.896494	1.05734e-06	1.86154	Q966L1	NP_491306.1	PON (Paraoxonase) and MEC-6 Like		arylesterase activity [GO:0004064]; hydrolase activity, acting on ester bonds [GO:0016788]		fat content reduced	N.A.	N.A.	DA neuron, intestine, pharyngeal muscle cell, VA neuron	The E01A2.7 gene encodes one of five paraoxonase-like proteins; it is homologous to the human genes PARAOXONASE 1 gene (PON1, OMIM:168820) and PARAOXONASE 2 (OMIM:602447), which in some allelic forms are associated with susceptibility to coronary artery disease or to variations in fasting plasma glucose.
WBGene00007740	C26C6.6	C26C6.6	0.894537	0.00219994	1.85901	Q18208	NP_492106.1	Uncharacterized protein		metal ion binding [GO:0046872]		N.A.	N.A.	N.A.	AVA, germ line, male, neuron	C26C6.6 is an ortholog of human Pxn (paxillin) and members of the LIM domain containing family including LMO1; microarray, tiling array, and RNA sequencing studies indicate that C26C6.6 is affected by spe-44, rsr-2, csr-1, pgl-1, pgl-3, glh-4, glh-1, jmjd-3.1, hsf-1, mir-71, aak-2, isp-1, and nuo-6; microarray and RNA sequencing studies indicate that C26C6.6 is affected by Methylmercuric chloride…
WBGene00206381	F52H2.15	F52H2.15	0.893307	0.00247232	1.85743	E6N0V0	NP_001256995.1	Uncharacterized protein				N.A.	N.A.	N.A.	N.A.	RNA sequencing studies indicate that F52H2.15 is affected by daf-12; RNA sequencing studies indicate that F52H2.15 is affected by Multi-walled carbon nanotubes.
WBGene00000046	acr-7	T09A5.3	0.891687	7.13272e-06	1.85534	P45963	NP_495647.1	Acetylcholine receptor subunit alpha-type acr-7		extracellular ligand-gated ion channel activity [GO:0005230]; transmembrane signaling receptor activity [GO:0004888]		N.A.	amplitude of sinusoidal movement variant, backing decreased, backward point velocity decreased, body posture wavelength increased, coiling frequency, forward point velocity decreased, frequency body bend reduced, head bend angle increased, long, nose movement increased, tail bend angle variant, turning frequency variant	pharyngeal muscle cell, tail, vulva	N.A.	acr-7 encodes an alpha-7-like homomer-forming subunit of the nicotinic acetylcholine receptor (nAChR) superfamily which encode ligand-gated ion channels that regulate fast action of acetylcholine at neuromuscular junctions and in the nervous system; ACR-7 is expressed pharyngeal muscle and in tail neurons distal to the anus, and is a member of the ACR-16-like group of nAChR subunits.
WBGene00014106	ZK856.5	ZK856.5	0.89136	0.000215622	1.85492	Q23640	NP_505620.4	Uncharacterized protein		hydrolase activity [GO:0016787]		N.A.	N.A.	N.A.	coelomocyte, intestine	ZK856.5 is an ortholog of human SMPDL3A (sphingomyelin phosphodiesterase acid like 3A) and SMPDL3B (sphingomyelin phosphodiesterase acid like 3B); ZK856.5 is predicted to have hydrolase activity, based on protein domain information.
WBGene00020221	T05A7.3	T05A7.3	0.885309	0.00237953	1.84716	Q22206	NP_494827.1	Uncharacterized protein				dauer lifespan extended	N.A.	N.A.	intestine	Microarray and RNA sequencing studies indicate that T05A7.3 is affected by lin-15B, emr-1, lem-2, daf-2, mir-34, pgl-1, pgl-3, glh-4, glh-1, smg-2, his-3, and pmk-1; RNA sequencing and microarray studies indicate that T05A7.3 is affected by Multi-walled carbon nanotubes and Sirolimus; RNA sequencing studies indicate that T05A7.3 is enriched in the intestine.
WBGene00015050	clec-51	B0218.6	0.885043	1.23981e-06	1.84682	Q17450	NP_501369.1, NP_001294156.1	C-type LECtin		carbohydrate binding [GO:0030246]; transmembrane signaling receptor activity [GO:0004888]		N.A.	N.A.	N.A.	germ line, intestine	clec-51 is an ortholog of human PLA2R1 (phospholipase A2 receptor 1) and members of the COLEC (Collectins) family including COLEC11, CD (CD molecules) family including CD302 and SCAR (Scavenger receptors) family including LY75; microarray and RNA sequencing studies indicate that clec-51 is affected by Aldicarb, Methylmercuric chloride, Rotenone, Cry5B, Quercetin, Humic substances, R24, Sirolimus,…
WBGene00021032	clec-118	W04H10.4	0.882716	0.0027633	1.84384	O44853	NP_001303785.1, NP_493771.3	C-type LECtin		carbohydrate binding [GO:0030246]		N.A.	N.A.	N.A.	coelomocyte, intestine	Tiling array, RNA sequencing, and microarray studies indicate that clec-118 is affected by rsr-2, hlh-30, ubc-9, clk-1, hsf-1, mir-34, smg-2, sir-2.1, eri-1, rrf-1, and rrf-3; microarray and RNA sequencing studies indicate that clec-118 is affected by Tunicamycin, Multi-walled carbon nanotubes, Resveratrol, Allantoin, Sirolimus, and Triclosan; tiling array and microarray studies indicate that cle…
WBGene00021193	math-44	Y16E11A.1	0.881763	0.00210224	1.84263	Q9N487	NP_494144.2	MATH (Meprin-associated Traf homology) domain containing				dauer lifespan extended	N.A.	N.A.	gon_male_dtc anterior, gon_male_dtc posterior, hermaphrodite-specific, Z1.p, Z4.a	Microarray and RNA sequencing studies indicate that math-44 is affected by lin-15B, lin-35, csr-1, dpy-21, pgl-1, pgl-3, glh-4, glh-1, and hrde-1; microarray studies indicate that math-44 is affected by Colistin; RNA sequencing studies indicate that math-44 is enriched in the gon_male_dtc posterior, gon_male_dtc anterior, Z1.p, Z4.a, and hermaphrodite-specific tissues.
WBGene00194788	R02D5.10	R02D5.10	0.881588	0.00203009	1.8424	C9IY33	NP_001256588.1	Uncharacterized protein				locomotion variant	N.A.	N.A.	intestine, male	RNA sequencing studies indicate that R02D5.10 is affected by alg-3, alg-4, csr-1, pgl-1, pgl-3, glh-4, glh-1, jmjd-3.1, dpy-21, alg-1, and mir-71; RNA sequencing studies indicate that R02D5.10 is enriched in the male and intestine.
WBGene00016700	C46A5.4	C46A5.4	0.87995	0.000200132	1.84031	Q18647	NP_501272.2	Uncharacterized protein	response to oxidative stress [GO:0006979]	heme binding [GO:0020037]; peroxidase activity [GO:0004601]		protruding vulva	N.A.	N.A.	intestine	C46A5.4 is predicted to have heme binding activity and peroxidase activity, based on protein domain information.
WBGene00022246	acp-7	Y73B6BL.25	0.879766	1.87564e-06	1.84008	Q9GUF1	NP_500983.1	ACid Phosphatase family				N.A.	N.A.	N.A.	arcade cell, excretory cell, OLL, pharyngeal-intestinal valve cell, PVD	acp-7 is an ortholog of human ACPT (acid phosphatase, testicular), ACPP (acid phosphatase, prostate) and ACP2 (acid phosphatase 2, lysosomal); RNA sequencing and microarray studies indicate that acp-7 is affected by Rotenone, Bisphenol A, Zidovudine, Diazinon, Quercetin, Colistin, Dafa#1, and Sirolimus; tiling array and RNA sequencing studies indicate that acp-7 is enriched in the excretory cell,…
WBGene00013027	Y49A3A.4	Y49A3A.4	0.879687	6.0722e-06	1.83998	Q9XW91	NP_506562.1	Uncharacterized protein				N.A.	N.A.	N.A.	AFD, DA neuron, muscle cell, VA neuron	Microarray and RNA sequencing studies indicate that Y49A3A.4 is affected by cyc-1, wdr-5.1, csr-1, daf-2, jmjd-3.1, jmjd-1.2, dpy-21, mir-34, daf-12, daf-16, smg-2, alg-1, isp-1, nuo-6, and pmk-1; RNA sequencing and microarray studies indicate that Y49A3A.4 is affected by Bisphenol S, Resveratrol, single-walled carbon nanotubes, and Dafa#1; tiling array and RNA sequencing studies indicate that Y4…
WBGene00020707	wago-10	T22H9.3	0.879122	0.0026008	1.83926	Q9TXN7	NP_503177.1	Piwi-like protein	gene silencing by RNA [GO:0031047]	nucleic acid binding [GO:0003676]		N.A.	N.A.	N.A.	male	wago-10 is an ortholog of members of the human AGO, PIWIL (Argonaute/PIWI) family including AGO4; wago-10 is predicted to have nucleic acid binding activity, based on protein domain information.
WBGene00004139	pqn-54	R09B5.5	0.878067	7.56043e-06	1.83791	O44606	NP_503423.1	Prion-like-(Q/N-rich)-domain-bearing protein				dauer constitutive, developmental delay, feeding reduced, pathogen susceptibility increased, shortened life span, slow growth, stuffed pharynx	N.A.	N.A.	DA neuron, pharynx, VA neuron	The protein product of this gene is predicted to contain a glutamine/asparagine (Q/N)-rich ('prion') domain, by the algorithm of Michelitsch and Weissman (as of the WS77 release of WormBase, i.e., in wormpep77).
WBGene00000878	cyn-2	ZK520.5	0.872519	0.00114659	1.83086	P52010	NP_499828.1	Peptidyl-prolyl cis-trans isomerase 2 (PPIase 2) (EC 5.2.1.8) (Cyclophilin-2) (Rotamase 2)	protein folding [GO:0006457]	peptidyl-prolyl cis-trans isomerase activity [GO:0003755]		N.A.	N.A.	N.A.	male	cyn-2 is a predicted member of the cytosolic Cyclosporin A-binding cyclophilin family that is functional when expressed in E. coli.
WBGene00000649	col-73	F11G11.12	0.872229	7.25466e-08	1.83049	P91250	NP_494880.1	COLlagen		structural constituent of cuticle [GO:0042302]		dumpy, no induction of antimicrobial peptide expression after infection	N.A.	N.A.	DA neuron, germline precursor cell, intestine, PLM, VA neuron, Z1, Z4	col-73 is an ortholog of human MARCO (macrophage receptor with collagenous structure); col-73 is a structural constituent of cuticle, based on protein domain information.
WBGene00000597	col-8	F11H8.3	0.867655	0.00202958	1.82469	P18833	NP_498533.2	collagen		structural constituent of cuticle [GO:0042302]		N.A.	N.A.	N.A.	cephalic sheath cell, dopaminergic neuron, germ line	col-8 encodes a collagen, individually dispensable for viability and gross morphology, which is specifically expressed in dauers and adults but not in eggs or L4 larvae, like col-7, col-18, and col-19; the amino- and carboxyl-terminal cysteine-rich regions of COL-8 are most closely related to those of COL-19, COL-35, and COL-39.
WBGene00044469	clec-173	T26C12.6	0.866114	5.56323e-10	1.82275	Q4R111	NP_001033434.1	C-type LECtin		carbohydrate binding [GO:0030246]		N.A.	N.A.	N.A.	intestine	Microarray and RNA sequencing studies indicate that clec-173 is affected by Tunicamycin, Mianserin, Cry5B, Paraquat, Colistin, and Sirolimus; RNA sequencing studies indicate that clec-173 is enriched in the intestine.
WBGene00000752	col-179	C34F6.3	0.862181	0.00337345	1.81778	O17642	NP_509870.1	COLlagen	defense response to Gram-negative bacterium [GO:0050829]; innate immune response [GO:0045087]	structural constituent of cuticle [GO:0042302]		fat content increased, pathogen susceptibility increased	N.A.	N.A.	hypodermis	col-179 is an ortholog of human MARCO (macrophage receptor with collagenous structure); col-179 is involved in defense response to Gram-negative bacterium and innate immune response; col-179 is a structural constituent of cuticle, based on protein domain information.
WBGene00008559	F07H5.8	F07H5.8	0.859245	5.00118e-05	1.81409	Q19182	NP_495874.3	Uncharacterized protein				N.A.	N.A.	N.A.	DA neuron, GABAergic neuron, VA neuron	RNA sequencing and microarray studies indicate that F07H5.8 is affected by Methylmercury hydroxide, Rotenone, Sodium arsenite, Zidovudine, Resveratrol, single-walled carbon nanotubes, Colistin, Dafa#1, adsorbable organic bromine compounds, and Sirolimus; microarray studies indicate that F07H5.8 is enriched in the GABAergic and DA neurons.
WBGene00010108	F55C10.4	F55C10.4	0.858012	0.00244874	1.81254	Q20806	NP_505887.1	Glycosyltransferase family 92 protein F55C10.4 (EC 2.4.1.-)		transferase activity, transferring glycosyl groups [GO:0016757]		N.A.	N.A.	N.A.	N.A.	Microarray and RNA sequencing studies indicate that F55C10.4 is affected by let-7, nhr-114, emr-1, lem-2, bar-1, ubc-9, clk-1, jmjd-3.1, jmjd-1.2, hsf-1, pgl-1, pgl-3, glh-4, glh-1, lin-22, ain-2, mir-243, aak-2, oga-1, and pmk-1; microarray and RNA sequencing studies indicate that F55C10.4 is affected by Heme, Ethanol, Methylmercury hydroxide, Mercuric Chloride, Tunicamycin, Multi-walled carbon …
WBGene00044011	T06E4.12	T06E4.12	0.849642	4.04044e-05	1.80205	Q5FC67	NP_001024108.1	Uncharacterized protein		structural constituent of cell wall [GO:0005199]		N.A.	N.A.	N.A.	intestine	T06E4.12 is a structural constituent of cell wall, based on protein domain information.
WBGene00000133	amt-1	C05E11.4	0.849633	0.0024633	1.80204	P54145	NP_508784.1	Putative ammonium transporter 1	ammonium transmembrane transport [GO:0072488]; organic cation transport [GO:0015695]	ammonium transmembrane transporter activity [GO:0008519]		N.A.	N.A.	N.A.	N.A.	amt-1 encodes a transmembrane transporter that by homology, is predicted to transport ammonium ions across the plasma membrane; as loss of amt-1 activity via large-scale RNAi screens does not result in any obvious abnormalities, the precise role of AMT-1 in C. elegans development and/or behavior is not yet known.
WBGene00045399	Y47G6A.33	Y47G6A.33	0.848587	7.37784e-06	1.80074	A5A8P5	NP_001122541.1	Uncharacterized protein				N.A.	N.A.	N.A.	hypodermis	RNA sequencing studies indicate that Y47G6A.33 is affected by Ethanol, Rotenone, Manganese chloride, and Zidovudine; tiling array and RNA sequencing studies indicate that Y47G6A.33 is enriched in the hypodermis.
WBGene00017743	F23F1.2	F23F1.2	0.845276	0.000359538	1.79661	O17068	NP_493641.2	Uncharacterized protein		calcium ion binding [GO:0005509]		N.A.	N.A.	N.A.	AFD, dopaminergic neuron, hermaphrodite-specific, hypodermis	F23F1.2 is predicted to have calcium ion binding activity, based on protein domain information.
WBGene00001102	dsh-2	C27A2.6	0.831994	4.89113e-09	1.78014	Q18239	NP_494937.4	DiSHevelled related	asymmetric cell division [GO:0008356]; canonical Wnt signaling pathway [GO:0060070]; cell fate specification [GO:0001708]; digestive tract morphogenesis [GO:0048546]; embryonic digestive tract morphogenesis [GO:0048557]; embryonic morphogenesis [GO:0048598]; endodermal cell fate specification [GO:0001714]; establishment of mitotic spindle orientation [GO:0000132]; gonad morphogenesis [GO:0035262]…	frizzled binding [GO:0005109]; signaling adaptor activity [GO:0035591]		body axis development variant, body muscle dystrophy, body wall muscle physiology variant, cell division polarity variant, cell polarity variant, division axis defective, embryonic cell organization biogenesis variant, embryonic lethal, exploded through vulva, fewer seam cells, gastrulation variant, intestinal cell development variant, intestinal development variant, larval arrest, larval lethal,…	extra linker cells, gonad development variant, male gonad morphology variant, missing distal tip cells, missing gonad arms, multiple anchor cells, pattern of transgene expression variant, reduced brood size	gon_herm_dtc_A, gon_herm_dtc_P, head neuron, intestine, nerve ring, nervous system, tail neuron, ventral cord neuron, Z1, Z4	germ line, gon_male_dtc anterior, gon_male_dtc posterior, intestine, Z1.p, Z4.a	dsh-2 encodes one of three C. elegans Dishevelled (Dsh) homologs; during embryonic development, dsh-2 functions in the Wnt signaling pathway that specifies endoderm and orients the division axis of the EMS blastomere; dsh-2 is also required for many neuronal cell fate specifications and for asymmetric cell division in the early somatic gonad; dsh-2 is additionally required for proper hypodermal m…
WBGene00018804	F54D10.3	F54D10.3	0.826515	4.66716e-06	1.7734	Q9TZ87	NP_494658.1	Uncharacterized protein				dauer lifespan extended	N.A.	N.A.	AFD, BAG, dopaminergic neuron, germ line, PLM, ventral nerve cord	Microarray and RNA sequencing studies indicate that F54D10.3 is affected by sma-2, lin-15B, htz-1, hsf-1, let-418, chd-3, dpy-21, mir-34, pgl-1, pgl-3, glh-4, glh-1, sma-4, smg-2, sir-2.1, daf-2, isp-1, and nuo-6; microarray studies indicate that F54D10.3 is affected by Atrazine and Paraquat; tiling array and RNA sequencing studies indicate that F54D10.3 is enriched in the ventral nerve cord and …
WBGene00012013	ugt-54	T25B9.7	0.826457	9.89206e-06	1.77333	Q22770	NP_501996.2	UDP-GlucuronosylTransferase	metabolic process [GO:0008152]	glucuronosyltransferase activity [GO:0015020]		N.A.	N.A.	N.A.	intestine	ugt-54 is an ortholog of human UGT3A2 (UDP glycosyltransferase family 3 member A2) and UGT3A1 (UDP glycosyltransferase family 3 member A1); ugt-54 is predicted to have transferase activity, transferring hexosyl groups, based on protein domain information.
WBGene00016667	C45E5.4	C45E5.4	0.82415	5.58744e-05	1.77049	Q18642	NP_500854.1	Uncharacterized protein				N.A.	N.A.	N.A.	OLL, pharynx, PVD	Microarray and RNA sequencing studies indicate that C45E5.4 is affected by Heme, Mercuric Chloride, Rotenone, Multi-walled carbon nanotubes, D-glucose, Indole, Zidovudine, Resveratrol, Hydrolyzable Tannins, and Allantoin; tiling array and RNA sequencing studies indicate that C45E5.4 is enriched in the pharynx and in the PVD and OLL neurons.
WBGene00003571	ncx-6	C07A9.4	0.822652	2.45165e-05	1.76865	P34315	NP_499146.2	Putative sodium/calcium exchanger 6 (Na(+)/Ca(2+)-exchange protein 6)	calcium ion transport [GO:0006816]; sodium ion transport [GO:0006814]	antiporter activity [GO:0015297]		N.A.	N.A.	ADLL, ADLR, intestine	germ line, intestine	ncx-6 encodes a putative Na[+]/Ca[2+] exchanger of uncertain stoichiometry and affinity, orthologous to human SLC24A6 and paralogous to NCX-7/-10; NCX-6 may function intracellularly; NCX-6 has tandem Calx-alpha domains predicted to carry out ion transport; NCX-6 has no obvious function in mass RNAi assays.
WBGene00007851	clec-245	C31G12.2	0.820448	0.00362044	1.76595	O17630	NP_507555.1	C-type LECtin		carbohydrate binding [GO:0030246]		N.A.	N.A.	N.A.	N.A.	Tiling array, microarray, and RNA sequencing studies indicate that clec-245 is affected by rsr-2, bar-1, ubc-9, clk-1, npr-1, daf-2, mir-34, daf-12, daf-16, dpy-21, smg-2, and ain-1; RNA sequencing and microarray studies indicate that clec-245 is affected by Rotenone, Tunicamycin, adsorbable organic bromine compounds, and Sirolimus.
WBGene00008632	fbxa-88	F10A3.2	0.818559	0.00259225	1.76364	O45335	NP_507065.2	F-box A protein				dauer lifespan extended	N.A.	N.A.	N.A.	This gene encodes a protein containing an F-box, a motif predicted to mediate protein-protein interactions either with homologs of yeast Skp-1p or with other proteins; this gene's encoded protein also contains an FTH/DUF38 motif, which may also mediate protein-protein interaction.
WBGene00000715	col-142	T15B7.4	0.814586	3.45244e-06	1.75879	O17036	NP_504736.1	COLlagen		structural constituent of cuticle [GO:0042302]		dauer lifespan extended	N.A.	N.A.	cephalic sheath cell, hypodermis	col-142 is an ortholog of human SFTPD (surfactant protein D); col-142 is a structural constituent of cuticle, based on protein domain information.
WBGene00008892	clec-246	F16H6.2	0.811734	0.003266	1.75532	G5EDV2	NP_507556.2	C-type LECtin		carbohydrate binding [GO:0030246]		N.A.	N.A.	N.A.	body wall muscle cell	Microarray and RNA sequencing studies indicate that clec-246 is affected by daf-2, mir-34, daf-12, daf-16, smg-2, and cox-5B; microarray studies indicate that clec-246 is affected by Triclosan; tiling array studies indicate that clec-246 is enriched in the body wall muscle cell.
WBGene00018761	F53E10.5	F53E10.5	0.810724	0.00402472	1.75409	P91317	NP_503712.2	Uncharacterized protein				N.A.	N.A.	N.A.	germ line, gon_male_dtc anterior, gon_male_dtc posterior, NSM, Z1.p, Z4.a	Microarray, RNA sequencing, and tiling array studies indicate that F53E10.5 is affected by clk-1, set-2, hsf-1, let-418, chd-3, mir-34, elli-1, pgl-1, pgl-3, glh-4, glh-1, his-3, daf-2, hcf-1, sir-2.1, and alg-1; RNA sequencing and microarray studies indicate that F53E10.5 is affected by Multi-walled carbon nanotubes and Sirolimus; RNA sequencing and tiling array studies indicate that F53E10.5 is…
WBGene00077691	T06E4.14	T06E4.14	0.810077	0.00322726	1.75331	B2D6L8	NP_001123005.1	Uncharacterized protein				N.A.	N.A.	N.A.	hypodermis, intestine, pharyngeal muscle cell	RNA sequencing and microarray studies indicate that T06E4.14 is affected by Ethanol, Methylmercury hydroxide, 1-methylnicotinamide, Rotenone, Manganese chloride, D-glucose, Zidovudine, and Resveratrol; tiling array, RNA sequencing, and microarray studies indicate that T06E4.14 is enriched in the pharyngeal muscle cell, intestine, and hypodermis.
WBGene00010637	K07F5.12	K07F5.12	0.808796	0.000313325	1.75175	Q9U3C0	NP_501769.1	Uncharacterized protein		carbohydrate transmembrane transporter activity [GO:0015144]		embryonic lethal, germ cell mitosis variant, rudimentary gonad, sterile	N.A.	N.A.	germ line, gon_male_dtc anterior, gon_male_dtc posterior, hermaphrodite-specific, intestine, NSM, Z1.p, Z4.a	K07F5.12 is an ortholog of human TMEM144 (transmembrane protein 144); K07F5.12 is predicted to have carbohydrate transmembrane transporter activity, based on protein domain information.
WBGene00012268	W04G5.8	W04G5.8	0.805225	0.00115604	1.74742	O18172	NP_492972.2	Uncharacterized protein				N.A.	N.A.	N.A.	Z1, Z4	Microarray, tiling array, and RNA sequencing studies indicate that W04G5.8 is affected by lin-15B, lin-35, hpl-2, csr-1, pgl-1, pgl-3, glh-4, glh-1, mir-34, lin-22, smg-2, his-3, and sir-2.1; microarray studies indicate that W04G5.8 is affected by Ethanol and Sirolimus; RNA sequencing studies indicate that W04G5.8 is enriched in the Z4 and Z1.
WBGene00021654	Y47G7B.2	Y47G7B.2	0.803388	0.00106311	1.74519	Q9TZD6	NP_494339.1	Uncharacterized protein				N.A.	N.A.	N.A.	amphid sheath cell, DA neuron, germ line, gon_male_dtc anterior, gon_male_dtc posterior, I5 neuron, retrovesicular ganglion, SAB, VA neuron, Z1, Z1.p, Z4, Z4.a	Microarray studies indicate that Y47G7B.2 is affected by Atrazine, Chlorpyrifos, adsorbable organic bromine compounds, and Sirolimus; tiling array, RNA sequencing, and microarray studies indicate that Y47G7B.2 is enriched in the Z4, Z1, gon_male_dtc posterior, gon_male_dtc anterior, Z1.p, Z4.a, amphid sheath cell, germ line, and germline precursor cell and in the DA, VA, I5, SAB, and retrovesicul…
WBGene00010657	K08D8.3	K08D8.3	0.799562	2.58538e-07	1.74057	Q21329	NP_502460.1	Uncharacterized protein				N.A.	N.A.	N.A.	ASER, intestine	RNA sequencing and microarray studies indicate that K08D8.3 is affected by Rotenone, Tunicamycin, D-glucose, Cry5B, Chlorpyrifos, Diazinon, and Humic substances; RNA sequencing and microarray studies indicate that K08D8.3 is enriched in the intestine and in the ASER neurons.
WBGene00014192	nhr-246	ZK1037.4	0.798912	0.00295949	1.73979	H9G309	NP_001256662.1, NP_001256661.1	Nuclear Hormone Receptor family				N.A.	N.A.	N.A.	N.A.	Microarray and RNA sequencing studies indicate that nhr-246 is affected by daf-2, let-418, chd-3, mir-34, daf-12, daf-16, dpy-21, and emb-4; RNA sequencing studies indicate that nhr-246 is affected by 1-methylnicotinamide and Zidovudine.
WBGene00018741	comt-1	F53B3.2	0.796894	3.75835e-05	1.73736	Q20710	NP_508495.2	Catechol-O-MethylTransferase family		O-methyltransferase activity [GO:0008171]		reduced brood size	N.A.	N.A.	N.A.	comt-1 is an ortholog of human COMTD1 (catechol-O-methyltransferase domain containing 1); comt-1 is predicted to have O-methyltransferase activity, based on protein domain information.
WBGene00019411	K05F1.10	K05F1.10	0.789623	1.04049e-07	1.72862	Q21248	NP_495148.1	Uncharacterized protein	innate immune response [GO:0045087]			N.A.	N.A.	N.A.	intestine, muscle cell, OLL, PVD	K05F1.10 encodes a putative secreted TIL-domain protease inhibitor paralogous to SWM-1, ISL-1, and the products of 11 other C. elegans genes; K05F1.10 and its relatives are collectively similar to other TIL-domain protease inhibitors from nematodes, insects, and vertebrates; K05F1.10 transcription is reproducibly induced by infection, suggesting that it may participate in innate immunity.
WBGene00017647	F20H11.4	F20H11.4	0.789328	0.00104876	1.72827	O01736	NP_498458.1	Protein-tyrosine-phosphatase		protein tyrosine phosphatase activity [GO:0004725]		N.A.	lethal, sterile	head neuron, nervous system, pharynx	germ line, hypodermis, male	F20H11.4 is an ortholog of human PTPRF (protein tyrosine phosphatase, receptor type F); F20H11.4 is predicted to have protein tyrosine phosphatase activity, based on protein domain information; F20H11.4 is expressed in the pharynx and the nervous system.
WBGene00000625	col-48	Y54E10BL.2	0.788087	1.10945e-05	1.72678	Q9N3D7	NP_491088.1	COLlagen		structural constituent of cuticle [GO:0042302]		embryonic lethal, exploded through vulva, larval arrest, lethal, oocyte physiology variant, organism development variant, protruding vulva, reduced brood size, sick, sterile	N.A.	N.A.	AFD, DA neuron, PLM, VA neuron, Z1, Z4	col-48 encodes a cuticle collagen.
WBGene00019858	R03H10.6	R03H10.6	0.787654	3.1504e-06	1.72627	Q9GYL9	NP_494733.2	Uncharacterized protein		double-stranded DNA binding [GO:0003690]		lawn leaving behavior variant	N.A.	N.A.	AFD, body wall muscle cell, coelomocyte, GABAergic neuron, gon_male_dtc anterior, gon_male_dtc posterior, intestine, muscle cell, Z1.p, Z4.a	R03H10.6 exhibits double-stranded DNA binding activity.
WBGene00001476	fmo-1	K08C7.2	0.786077	6.15646e-07	1.72438	G5EDP6	NP_501968.2	Flavin-containing monooxygenase (EC 1.-.-.-)	oxidation-reduction process [GO:0055114]	flavin adenine dinucleotide binding [GO:0050660]; monooxygenase activity [GO:0004497]; N,N-dimethylaniline monooxygenase activity [GO:0004499]; NADP binding [GO:0050661]		N.A.	N.A.	excretory gland cell, head, intestine, rectal gland cell	AFD, intestine, pharyngeal muscle cell	fmo-1 encodes a flavin-containing monoxygenase homologous to human FMO1, FMO2, and FMO3 (OMIM:602079, mutated in trimethylaminuria).
WBGene00007072	ugt-1	AC3.7	0.784132	1.39845e-07	1.72206	Q17403	NP_505671.1	UDP-GlucuronosylTransferase	metabolic process [GO:0008152]	glucuronosyltransferase activity [GO:0015020]		cadmium hypersensitive, life span variant, slow growth	organism hypersensitive desiccation	N.A.	intestine	ugt-1 is an ortholog of human UGT3A2 (UDP glycosyltransferase family 3 member A2) and UGT3A1 (UDP glycosyltransferase family 3 member A1); ugt-1 is predicted to have transferase activity, transferring hexosyl groups, based on protein domain information.
WBGene00004380	rnf-1	C06A5.9	0.783235	2.16631e-06	1.72099	O01482	NP_491738.2	RiNg Finger protein		metal ion binding [GO:0046872]		N.A.	N.A.	N.A.	germ line, Z1, Z4	RNA sequencing and microarray studies indicate that rnf-1 is affected by Manganese chloride, Zidovudine, Cry5B, Chlorpyrifos, Diazinon, Hydrolyzable Tannins, Humic substances, single-walled carbon nanotubes, Paraquat, and Sirolimus; RNA sequencing studies indicate that rnf-1 is enriched in the germ line, Z4, Z1, and germline precursor cell.
WBGene00012863	Y45F3A.8	Y45F3A.8	0.783132	4.24753e-05	1.72086	Q9XWZ0	NP_499332.2	Uncharacterized protein				N.A.	N.A.	N.A.	intestine	Microarray and RNA sequencing studies indicate that Y45F3A.8 is affected by wdr-5.1, cox-5B, jmjd-3.1, jmjd-1.2, daf-12, daf-16, dpy-21, mir-243, oga-1, ogt-1, and pmk-1; RNA sequencing and microarray studies indicate that Y45F3A.8 is affected by Multi-walled carbon nanotubes, Zidovudine, Selenium, Colistin, Dafa#1, Allantoin, and Sirolimus; RNA sequencing studies indicate that Y45F3A.8 is enrich…
WBGene00008091	C44F1.1	C44F1.1	0.782725	2.8106e-05	1.72038	G5EFT9	NP_497761.3	Uncharacterized protein				transgene expression reduced	N.A.	N.A.	CEM, dopaminergic neuron, HOB, IL2 neuron, intestine, OLL, pharyngeal muscle cell, PVD, ray neuron type B	RNA sequencing and microarray studies indicate that C44F1.1 is affected by Rotenone, Zidovudine, Sirolimus, and Triclosan; microarray, tiling array, and RNA sequencing studies indicate that C44F1.1 is enriched in the intestine, pharyngeal muscle cell, HOB, and CEM and in the PVD, OLL, dopaminergic, IL2, and ray type B neurons.
WBGene00019717	trx-3	M01H9.1	0.781188	0.000184563	1.71855	Q94282	NP_500578.2	ThioRedoXin [see also xtr]	cell redox homeostasis [GO:0045454]	thioredoxin-disulfide reductase activity [GO:0004791]		hypersensitive to protein aggregation induced paralysis	N.A.	intestine	intestine	trx-3 is expressed in the intestine; trx-3 is localized to the apical plasma membrane, the cytoplasm and the nucleus.
WBGene00011536	T06E4.9	T06E4.9	0.778311	0.000116313	1.71512	Q22263	NP_505481.2	Uncharacterized protein				N.A.	N.A.	N.A.	germ line, intestine, pharynx	RNA sequencing and microarray studies indicate that T06E4.9 is affected by Ethanol, Methylmercury hydroxide, Rotenone, Manganese chloride, D-glucose, Resveratrol, Hydrolyzable Tannins, single-walled carbon nanotubes, Colistin, Dafa#1, adsorbable organic bromine compounds, Sirolimus, and Triclosan; microarray, proteomic, and RNA sequencing studies indicate that T06E4.9 is enriched in the pharynx, …
WBGene00022260	Y73C8B.3	Y73C8B.3	0.776573	2.22951e-09	1.71306	Q9N4E2	NP_503878.2	Uncharacterized protein		hydrolase activity [GO:0016787]		N.A.	N.A.	N.A.	PLM	RNA sequencing and microarray studies indicate that Y73C8B.3 is affected by 1-methylnicotinamide, Rotenone, 4-bromodiphenyl ether, Cry5B, Chlorpyrifos, Diazinon, Hydrolyzable Tannins, R24, Paraquat, and Sirolimus; RNA sequencing studies indicate that Y73C8B.3 is enriched in the PLM neurons.
WBGene00003100	mab-3	Y53C12B.5	0.767454	0.00165489	1.70226	O18214	NP_871909.2, NP_001022464.1	Protein male abnormal 3	cell differentiation [GO:0030154]; negative regulation of transcription by RNA polymerase II [GO:0000122]; nematode male tail tip morphogenesis [GO:0045138]; positive regulation of gene expression [GO:0010628]; sex differentiation [GO:0007548]	DNA binding transcription factor activity [GO:0003700]; metal ion binding [GO:0046872]; RNA polymerase II proximal promoter sequence-specific DNA binding [GO:0000978]; RNA polymerase II regulatory region DNA binding [GO:0001012]		N.A.	leaving assay defective, male tail morphology variant, mate searching variant, pointed tail tip male, sexually dimorphic physiology variant, V lineages variant, yolk synthesis in males	ADFL, ADFR, head neuron, HOA, HOB, hypodermis, intestine, male, R1AL, R1AR, R1BL, R1BR, R2AL, R2AR, R2BL, R2BR, R3AL, R3AR, R3BL, R3BR, R4AL, R4AR, R4BL, R4BR, R5AL, R5AR, R5BL, R5BR, R6AL, R6AR, R6BL, R6BR, R7AL, R7AR, R7BL, R7BR, R8AL, R8AR, R8BL, R8BR, R9AL, R9AR, R9BL, R9BR, SPCL, SPCR, SPDL, SPDR, SPVL, SPVR, tail	male, male-specific	mab-3 encodes a DM (Doublesex and MAB-3) domain-containing protein; during development, MAB-3 plays a role in several aspects of male development; specifically, genetic studies indicate that MAB-3 likely augments the functions of the MAB-5 and EGL-5 homeodomain proteins by acting as a transcriptional repressor of ref-1, which encodes a basic helix-loop-helix (bHLH) protein that negatively regulat…
WBGene00009069	F23A7.4	F23A7.4	0.767344	6.91333e-05	1.70213	Q93557	NP_510641.1	Uncharacterized protein				N.A.	N.A.	N.A.	intestine, neuron	Microarray and RNA sequencing studies indicate that F23A7.4 is affected by Hydrogen sulfide, Ethanol, D-glucose, Resveratrol, Atrazine, Fluoranthene, Cry5B, and Colistin; RNA sequencing and microarray studies indicate that F23A7.4 is enriched in the germline precursor cell and intestine and in neurons.
WBGene00017305	nspb-12	F09F7.8	0.75532	0.000235429	1.68801	Q19279	NP_498194.2	Nematode Specific Peptide family, group B				N.A.	N.A.	N.A.	arcade cell, OLL, pharyngeal muscle cell, pharyngeal-intestinal valve cell, pharynx, PVD	RNA sequencing and microarray studies indicate that nspb-12 is affected by 1-methylnicotinamide, D-glucose, Neurotoxins, Sesamin, Zidovudine, Quercetin, adsorbable organic bromine compounds, Multi-walled carbon nanotubes, and Triclosan; microarray, tiling array, and RNA sequencing studies indicate that nspb-12 is enriched in the pharynx, pharyngeal muscle cell, arcade cell, and pharyngeal-intesti…
WBGene00004011	pha-2	M6.3	0.755132	0.00093573	1.68779	Q21578	NP_508131.4	Uncharacterized protein	actin cytoskeleton organization [GO:0030036]; animal organ morphogenesis [GO:0009887]; eating behavior [GO:0042755]; muscle cell fate specification [GO:0042694]; negative regulation of transcription by RNA polymerase II [GO:0000122]; nematode larval development [GO:0002119]; pharyngeal gland morphogenesis [GO:1905905]; pharyngeal muscle development [GO:0043282]; regulation of multicellular organi…	RNA polymerase II regulatory region sequence-specific DNA binding [GO:0000977]; transcriptional repressor activity, RNA polymerase II transcription regulatory region sequence-specific DNA binding [GO:0001227]		developmental delay postembryonic, isthmus morphology defective	axon branching variant, axon guidance variant, axon trajectory variant, gland cell morphology variant, isthmus morphology defective, L1 arrest, lethal, neuron positioning variant, starved, sterile, terminal bulb morphology variant	corpus, germ line, head neuron, I4 neuron, intestine, metacorpus, pharyngeal epithelial cell, pharynx, pm5, rectal gland cell, terminal bulb	N.A.	pha-2 encodes a homeodomain protein that is orthologous to vertebrate Hex proteins required for the development of B lymphocytes and organs derived from foregut endoderm; in C. elegans, pha-2 is essential for proper development and morphogenesis of the pm5 pharyngeal muscles cells during late stages of embryogenesis; in regulating pm5 fate specification, PHA-2 appears to act downstream of the org…
WBGene00012101	zip-10	T27F2.4	0.752298	3.88005e-05	1.68447	Q22835	NP_505951.1	BZIP transcription factor family	innate immune response [GO:0045087]			long, rays fused	N.A.	intestine, neuron	dopaminergic neuron, intestine, OLL, PVD	zip-10 is involved in innate immune response[HEP]; zip-10 is expressed in the nervous system and the intestine.
WBGene00000722	col-149	B0024.1	0.750761	0.000204513	1.68268	Q17417	NP_505646.1	COLlagen		structural constituent of cuticle [GO:0042302]		N.A.	N.A.	N.A.	hypodermis	col-149 is an ortholog of human SFTPD (surfactant protein D); col-149 is a structural constituent of cuticle, based on protein domain information.
WBGene00004146	pqn-63	T06E4.11	0.750537	0.000300646	1.68242	Q22265	NP_505479.3	Prion-like-(Q/N-rich)-domain-bearing protein				N.A.	N.A.	N.A.	DA neuron, pharynx, VA neuron	The protein product of this gene is predicted to contain a glutamine/asparagine (Q/N)-rich ('prion') domain, by the algorithm of Michelitsch and Weissman (as of the WS77 release of WormBase, i.e., in wormpep77).
WBGene00009835	F47H4.2	F47H4.2	0.750467	0.0015068	1.68234	B3WFZ1	NP_001129898.2, NP_507396.2	Uncharacterized protein				N.A.	N.A.	N.A.	intestine	This gene encodes a protein containing an F-box, a motif predicted to mediate protein-protein interactions either with homologs of yeast Skp-1p or with other proteins; this gene's encoded protein also contains an FTH/DUF38 motif, which may also mediate protein-protein interaction.
WBGene00175035	F54C9.14	F54C9.14	0.747463	0.00176458	1.67884	B7WN78	NP_001254160.1	Uncharacterized protein				N.A.	N.A.	N.A.	male	RNA sequencing and microarray studies indicate that F54C9.14 is affected by eat-2, clk-1, csr-1, pgl-1, pgl-3, glh-4, glh-1, daf-16, jmjd-3.1, sma-4, and mir-71; RNA sequencing studies indicate that F54C9.14 is enriched in the male.
WBGene00016970	C56E6.2	C56E6.2	0.747206	1.40333e-05	1.67854	Q18898	NP_495318.2	Uncharacterized protein		GTPase activity [GO:0003924]; GTP binding [GO:0005525]		N.A.	N.A.	N.A.	gon_male_dtc anterior, gon_male_dtc posterior, hypodermis, intestine, Z1, Z1.p, Z4, Z4.a	C56E6.2 is predicted to have GTP binding activity and GTPase activity, based on protein domain information.
WBGene00000030	abu-7	C03A7.8	0.746899	0.000856079	1.67818	O16502	NP_504384.1	Activated in Blocked Unfolded protein response	endoplasmic reticulum unfolded protein response [GO:0030968]; pharynx development [GO:0060465]			dauer constitutive, developmental delay, feeding reduced, pathogen susceptibility increased, shortened life span, slow growth, stuffed pharynx	N.A.	grinder	pharynx	abu-7 encodes a transmembrane protein with a predicted signal sequence, a glutamine/asparagine-rich domain and multiple cysteine-rich repeats (DUF139); abu-7 expression is induced by blockage of the unfolded-protein response in the endoplasmic reticulum, and ABU-7 may help protect the organism from damage by improperly folded nascent protein.
WBGene00017431	F13H6.3	F13H6.3	0.744955	2.71705e-07	1.67592	Q07085	NP_504621.1	Esterase CM06B1 (EC 3.1.1.1)		carboxylic ester hydrolase activity [GO:0052689]		N.A.	N.A.	N.A.	AFD, intestine, OLL, PVD	Microarray and RNA sequencing studies indicate that F13H6.3 is affected by cyc-1, csr-1, glp-1, cox-5B, hsf-1, mir-34, pgl-1, pgl-3, glh-4, glh-1, emb-4, sma-2, sma-4, lin-22, smg-2, alg-1, tdp-1, daf-2, and daf-16; microarray and RNA sequencing studies indicate that F13H6.3 is affected by Tryptophan, 1-methylnicotinamide, Mianserin, Bisphenol A, Bisphenol S, 4-bromodiphenyl ether, Cadmium, Fluor…
WBGene00009227	F28G4.2	F28G4.2	0.740706	0.00134384	1.67099	O17852	NP_507110.1	Uncharacterized protein				N.A.	N.A.	N.A.	N.A.	Microarray, tiling array, and RNA sequencing studies indicate that F28G4.2 is affected by lin-15B, hpl-2, emr-1, lem-2, blmp-1, dpy-21, daf-12, daf-16, set-4, lin-22, sir-2.1, and mir-243; microarray and RNA sequencing studies indicate that F28G4.2 is affected by Aldicarb, Multi-walled carbon nanotubes, Resveratrol, Tetrabromobisphenol A, and Triclosan.
WBGene00015897	nhr-156	C17E7.1	0.735977	0.00111114	1.66553	O16398	NP_001309484.1	Nuclear Hormone Receptor family	transcription, DNA-templated [GO:0006351]	DNA binding transcription factor activity [GO:0003700]; sequence-specific DNA binding [GO:0043565]; zinc ion binding [GO:0008270]		N.A.	fat content variant	excretory cell, excretory gland cell, head neuron, intestine, pharynx, tail neuron, ventral nerve cord	intestine	nhr-156 is predicted to have DNA-binding transcription factor activity, sequence-specific DNA binding activity, and zinc ion binding activity, based on protein domain information; nhr-156 is expressed in the pharynx, intestine, excretory gland cell, excretory cell, ventral nerve cord, head neurons, and the tail neurons.
WBGene00016625	aff-1	C44B7.3	0.73582	0.000218107	1.66534	G5EGL9	NP_495402.3	Cell fusion protein aff-1 (Anchor cell fusion failure protein 1)	multicellular organism development [GO:0007275]; plasma membrane fusion [GO:0045026]; regulation of oviposition [GO:0046662]; syncytium formation by plasma membrane fusion [GO:0000768]			anchor cell fusion defective, cell development variant, cell growth variant, egg laying variant, pattern of transgene expression variant, receptor mediated endocytosis defective	egg laying defective, epithelial cell fusion failure, reduced brood size	Anchor cell, head neuron, hyp5, pm3, pm5, pm8, seam cell, tail neuron, ut2, ut4, uterine seam cell, vulA, vulD	DA neuron, VA neuron	aff-1 encodes a cell-surface protein required in late L4 larvae for various cell fusions, of which at least one (AC-utse) does not require EFF-1; in vulval development, AFF-1 is required for fusion of the anchor cell (AC) with the utse syncytium, of A cells to one another, and of D cells to one another; AFF-1 is also required for lateral seam cell fusions; since aff-1 mutants fail to mix AC with …
WBGene00015458	C04G6.10	C04G6.10	0.733867	0.00100688	1.66309	Q95QY1	NP_494944.1	Uncharacterized protein				N.A.	N.A.	pm6	N.A.	C04G6.10 is expressed in the pm6.
WBGene00010574	K04H4.5	K04H4.5	0.732205	0.00363024	1.66118	P34507	NP_499060.1	Uncharacterized protein K04H4.5				transgene expression increased	N.A.	N.A.	GABAergic neuron, germ line, male, muscle cell, Z1, Z4	RNA sequencing and microarray studies indicate that K04H4.5 is affected by Ethanol, Nicotinic acid, Methylmercuric chloride, Manganese chloride, D-glucose, Resveratrol, Humic substances, Paraquat, Colistin, Dafa#1, adsorbable organic bromine compounds, and Sirolimus; RNA sequencing and microarray studies indicate that K04H4.5 is enriched in the germ line, Z4, Z1, male, and muscle cell and in the …
WBGene00012917	Y46G5A.29	Y46G5A.29	0.73135	0.000176039	1.66019	Q9U2D5	NP_496734.4	Uncharacterized protein		calcium ion binding [GO:0005509]		N.A.	N.A.	N.A.	hypodermis, OLL, PLM, PVD	Y46G5A.29 is predicted to have calcium ion binding activity, based on protein domain information.
WBGene00008965	mltn-10	F19H8.5	0.731202	0.0025995	1.66002	Q7YX27	NP_001022099.2	MLt-TeN (Mlt-10) related				N.A.	N.A.	N.A.	N.A.	Microarray and RNA sequencing studies indicate that mltn-10 is affected by nhr-114, daf-2, npr-1, mir-60, mir-34, daf-12, daf-16, and dpy-21; RNA sequencing studies indicate that mltn-10 is affected by D-glucose and Zidovudine.
WBGene00001934	his-60	F55G1.11	0.73092	0.000284258	1.6597	P62784	NP_501203.2	Histone H4	nucleosome assembly [GO:0006334]	DNA binding [GO:0003677]; histone binding [GO:0042393]; protein heterodimerization activity [GO:0046982]		accumulated cell corpses, anaphase bridging, body elongation defective, body wall muscle myosin organization defective, cell corpse degradation variant, cell secretion variant, chromosome condensation variant, chromosome segregation variant, dauer lifespan extended, embryonic arrest, embryonic lethal, growth variant, intestinal degeneration, larval arrest, larval lethal, locomotion variant, lysos…	N.A.	N.A.	germ line, NSM	his-60 encodes an H4 histone; by homology, HIS-60 is predicted to function as a nucleosome component required for packaging of DNA into chromatin; his-60 expression is detected in early embryos, beginning at the 28-cell stage and continuing through the comma stage (early morphogenesis); his-60 is a replication-dependent histone locus that resides in a histone gene-rich region on chromosome IV.
WBGene00020989	W03D8.8	W03D8.8	0.72743	5.01318e-05	1.65569	O45003	NP_491047.2	Uncharacterized protein	acyl-CoA metabolic process [GO:0006637]; fatty acid metabolic process [GO:0006631]	acyl-CoA hydrolase activity [GO:0047617]		axon fasciculation variant, axon midline crossing variant, cord commissures fail to reach target, dendrite development variant, ventral cord patterning variant	N.A.	N.A.	intestine, male	W03D8.8 is an ortholog of human BAAT (bile acid-CoA:amino acid N-acyltransferase) and members of the ACOT (Acyl-CoA thioesterases) family including ACOT4; W03D8.8 is predicted to have thiolester hydrolase activity, based on protein domain information.
WBGene00023416	isl-1	R10H1.4	0.725985	1.96337e-05	1.65403	Q8MPZ7	NP_872050.1	Serine protease inhibitor 1 protein (Inhibitor of serine protease-like protein 1) (Putative trypsin inhibitor isl-1)		serine-type endopeptidase inhibitor activity [GO:0004867]		N.A.	N.A.	N.A.	hypodermis, intestine, muscle cell, PLM	isl-1 encodes a putative secreted TIL-domain protease inhibitor paralogous to SWM-1 and the products of 13 other C. elegans genes; ISL-1 and its relatives are collectively similar to other TIL-domain protease inhibitors from nematodes, insects, and vertebrates, such as Ascaris suum trypsin inhibitor ATI and Onchocerca volvulus SPI-1.
WBGene00011092	R07B7.8	R07B7.8	0.725743	1.83986e-05	1.65375	Q21799	NP_506029.2	Uncharacterized protein		hydrolase activity, acting on ester bonds [GO:0016788]		N.A.	N.A.	N.A.	intestine	R07B7.8 is an ortholog of human PLB1 (phospholipase B1); R07B7.8 is predicted to have phospholipase activity, based on protein domain information.
WBGene00001933	his-59	F55G1.2	0.72504	0.00185657	1.65295	P08898	NP_501204.1	Histone H3	nucleosome assembly [GO:0006334]	nucleosomal DNA binding [GO:0031492]; protein heterodimerization activity [GO:0046982]		accumulated cell corpses, anaphase bridging, avoids bacterial lawn, body elongation defective, cell corpse degradation variant, chromosome condensation variant, chromosome segregation variant, embryonic arrest, embryonic lethal, larval arrest, lima bean arrest, locomotion variant, lysosome-related organelle morphology variant, maternal sterile, organism morphology variant, pharyngeal development …	N.A.	N.A.	AFD, ASER, germ line, NSM, PLM	his-59 encodes an H3 histone; by homology, HIS-59 is predicted to function as a nucleosome component required for packaging of DNA into chromatin; his-59 is a replication-dependent histone locus that resides in a histone gene-rich region on chromosome IV.
WBGene00011364	T02B5.3	T02B5.3	0.723443	0.000199874	1.65112	P92016	NP_506504.2	Carboxylic ester hydrolase (EC 3.1.1.-)	metabolic process [GO:0008152]; modulation of chemical synaptic transmission [GO:0050804]; neuron cell-cell adhesion [GO:0007158]; postsynaptic membrane assembly [GO:0097104]; presynaptic membrane assembly [GO:0097105]; synaptic vesicle endocytosis [GO:0048488]	carboxylic ester hydrolase activity [GO:0052689]; neurexin family protein binding [GO:0042043]		N.A.	N.A.	N.A.	AFD, intestine	T02B5.3 is an ortholog of human ACHE (acetylcholinesterase (Cartwright blood group)) and CES2 (carboxylesterase 2); RNA sequencing and microarray studies indicate that T02B5.3 is affected by Rotenone, Levamisole, Procyanidin, Zidovudine, Cry5B, Chlorpyrifos, Diazinon, Paraquat, Multi-walled carbon nanotubes, Sirolimus, and Octopamine; RNA sequencing studies indicate that T02B5.3 is enriched in th…
WBGene00021082	zip-11	W08E12.1	0.723239	1.87087e-05	1.65088	Q9N5A8	NP_500318.1	BZIP transcription factor family	regulation of transcription by RNA polymerase II [GO:0006357]	DNA binding [GO:0003677]; DNA binding transcription factor activity [GO:0003700]		N.A.	N.A.	N.A.	intestine, OLL, PVD	zip-11 is an ortholog of human Atf3 (activating transcription factor 3) and members of the Basic leucine zipper proteins family including BATF and FOS (Fos transcription factor) family including FOSL2; zip-11 is predicted to have DNA binding activity and DNA-binding transcription factor activity, based on protein domain information.
WBGene00006448	glod-4	C16C10.10	0.719649	1.87838e-08	1.64678	Q09253	NP_497827.1	Glyoxalase 1 (CeGly) (Glyoxalase domain-containing protein 4)	determination of adult lifespan [GO:0008340]; methylglyoxal metabolic process [GO:0009438]			protein modification variant, reactive oxygen species homeostasis variant, shortened life span	N.A.	amphid neuron, anal sphincter muscle, Cell, head neuron, intestine, nervous system, pharyngeal-intestinal valve, pharynx, reproductive system, seam cell, vulval muscle	DA neuron, dopaminergic neuron, germ line, I5 neuron, intestine, muscle cell, PLM, retrovesicular ganglion, SAB, VA neuron	glod-4 encodes a glyoxalase required for normal lifespan, orthologous to human GLOD4; GLOD-4 is expressed in the larval and adult pharynx, pharyngeal-intestinal valve, intestine, anal sphincter, seam cells, amphids, and neurons, and in the adult reproductive system; overexpression of GLOD-4 increases glyoxalase activity 200-fold, reduces oxidative stress markers, and extends lifespan, probably by…
WBGene00018724	F53A9.1	F53A9.1	0.715818	1.02384e-09	1.64241	Q20690	NP_509474.1	Uncharacterized protein				N.A.	N.A.	intestine	ASER, dopaminergic neuron, intestine, OLL, PVD	F53A9.1 is expressed in the intestine.
WBGene00008283	C53D6.6	C53D6.6	0.714118	1.87061e-06	1.64048	Q18809	NP_501570.1	Uncharacterized protein	regulation of transcription by RNA polymerase II [GO:0006357]	DNA binding transcription factor activity [GO:0003700]; protein dimerization activity [GO:0046983]; RNA polymerase II regulatory region sequence-specific DNA binding [GO:0000977]		N.A.	N.A.	N.A.	AVA, intestine	C53D6.6 is an ortholog of human ZBED6 (zinc finger BED-type containing 6) and ZBED4 (zinc finger BED-type containing 4); C53D6.6 is predicted to have protein dimerization activity, based on protein domain information.
WBGene00004064	pms-2	H12C20.2	0.711992	2.16966e-07	1.63806	G5EFG5	NP_505934.1, NP_505933.1	PMS (Post Meiotic Segregation) family	mismatch repair [GO:0006298]	ATPase activity [GO:0016887]; ATP binding [GO:0005524]; mismatched DNA binding [GO:0030983]; single-stranded DNA binding [GO:0003697]		embryonic lethal, spontaneous mutation rate increased	transgene expression increased, transgene expression reduced	N.A.	germ line, hypodermis, OLL, PVD	pms-2 is an ortholog of human Pms2 (PMS1 2, mismatch repair system component); pms-2 is predicted to have ATP binding activity, ATPase activity, and mismatched DNA binding activity, based on protein domain information.
WBGene00020827	T26A8.4	T26A8.4	0.710934	7.57997e-06	1.63686	Q22805	NP_501435.1	Uncharacterized protein		metal ion binding [GO:0046872]		embryonic lethal, germ cell mitosis variant, larval arrest, late larval lethal, lethal, locomotion variant, protruding vulva, slow embryonic development, slow growth, small, sterile, transgene expression reduced	N.A.	N.A.	AFD, germ line, neuron, NSM	T26A8.4 encodes the C. elegans ortholog of Saccharomyces cerevisiae Caf120, a component of the conserved Ccr4-Not deadenylase complex that regulates transcription and RNA degradation; in C. elegans, T26A8.4 is essential for embryonic and larval development, as well as germ cell and vulval development, normal body size, and proper locomotion.
WBGene00007056	crn-7	F09G8.2	0.705573	1.02407e-05	1.63079	P34387	NP_498817.1	Cell-death-related nuclease 7 (EC 3.1.-.-)	apoptotic DNA fragmentation [GO:0006309]	deoxyribonuclease II activity [GO:0004531]		N.A.	disorganized pharyngeal EPG, pharyngeal contraction variant, pharyngeal pumping reduced	N.A.	ASER, OLL, PVD	crn-7 is an ortholog of human DNASE2B (deoxyribonuclease 2 beta) and DNASE2 (deoxyribonuclease 2, lysosomal); crn-7 is predicted to have deoxyribonuclease II activity, based on protein domain information.
WBGene00007414	C07E3.3	C07E3.3	0.705098	4.30121e-05	1.63025	K8FDZ1	NP_001263669.1, NP_496230.2	Uncharacterized protein				N.A.	N.A.	N.A.	intestine, pharyngeal muscle cell	Microarray and RNA sequencing studies indicate that C07E3.3 is affected by Diallyl trisulfide, Rotenone, D-glucose, Cry5B, Chlorpyrifos, Quercetin, Humic substances, single-walled carbon nanotubes, Paraquat, Colistin, Sirolimus, and Octopamine; tiling array studies indicate that C07E3.3 is enriched in the intestine and pharyngeal muscle cell.
WBGene00010899	M28.8	M28.8	0.704151	2.65419e-05	1.62919	Q21574	NP_496294.1	Uncharacterized protein				N.A.	N.A.	N.A.	dopaminergic neuron, intestine	Microarray studies indicate that M28.8 is affected by Heme, Cry5B, Quercetin, Humic substances, Colistin, Dafa#1, and Sirolimus; tiling array, RNA sequencing, and microarray studies indicate that M28.8 is enriched in the intestine and in the dopaminergic neurons.
WBGene00001663	gpa-1	T19C4.6	0.703511	0.00116322	1.62846	P28051	NP_505840.1, NP_001123018.1	G Protein, Alpha subunit	G-protein coupled receptor signaling pathway [GO:0007186]	G-protein beta/gamma-subunit complex binding [GO:0031683]; GTPase activity [GO:0003924]; GTP binding [GO:0005525]		N.A.	amplitude of sinusoidal movement increased, backing decreased, backward point velocity increased, body posture amplitude variant, fat, forward locomotion increased, frequency of body bend variant, head bend angle increased, nose movement increased, roaming increased, tail bend angle decreased	ADLL, ADLR, ASHL, ASHR, ASIL, ASIR, ASJL, ASJR, head, PHAL, PHAR, PHBL, PHBR, postcloacal sensillum, SPDL, SPDR	germ line, neuron	gpa-1 encodes a member of the G protein alpha subunit family of heterotrimeric GTPases that is involved in chemotaxis to water-soluble odorants; it is expressed in sensory neurons and in the spicule and phasmid neurons of the male tail.
WBGene00015335	acdh-6	C02D5.1	0.703133	0.000150457	1.62804	P34275	NP_498885.1	Probable acyl-CoA dehydrogenase 6 (Probable isovaleryl-CoA dehydrogenase) (IVD) (EC 1.3.8.4)	leucine catabolic process [GO:0006552]	acyl-CoA dehydrogenase activity [GO:0003995]; flavin adenine dinucleotide binding [GO:0050660]		N.A.	N.A.	N.A.	DA neuron, germline precursor cell, hypodermis, VA neuron	acdh-6 is an ortholog of human ACADL (acyl-CoA dehydrogenase, long chain); acdh-6 is predicted to have flavin adenine dinucleotide binding activity and oxidoreductase activity, acting on the CH-CH group of donors, based on protein domain information.
WBGene00013242	Y56A3A.30	Y56A3A.30	0.702976	6.16749e-08	1.62786	Q9U234	NP_499562.1	Uncharacterized protein				Fluorouracil resistant, spontaneous mutation rate increased, transgene expression increased	N.A.	N.A.	ASER, gon_male_dtc anterior, gon_male_dtc posterior, intestine, neuron, Z1.p, Z4.a	Microarray, tiling array, and RNA sequencing studies indicate that Y56A3A.30 is affected by clk-1, hpl-2, lsm-1, dpy-21, pgl-1, pgl-3, glh-4, glh-1, sma-2, sma-4, tdp-1, and nuo-6; microarray studies indicate that Y56A3A.30 is affected by Aldicarb and adsorbable organic bromine compounds; RNA sequencing and microarray studies indicate that Y56A3A.30 is enriched in the gon_male_dtc posterior, gon_…
WBGene00020365	T08G2.2	T08G2.2	0.702425	0.000761027	1.62724	Q22346	NP_510787.2	Uncharacterized protein				N.A.	N.A.	N.A.	FLP	Tiling array, RNA sequencing, and microarray studies indicate that T08G2.2 is affected by hpl-2, rsr-2, clk-1, tdp-1, jmjd-3.1, jmjd-1.2, daf-12, daf-16, dpy-21, pgl-1, pgl-3, glh-4, glh-1, alg-1, alg-2, sma-2, sma-4, lin-22, and mir-243; RNA sequencing studies indicate that T08G2.2 is affected by Methylmercury hydroxide and Multi-walled carbon nanotubes; microarray studies indicate that T08G2.2 …
WBGene00020599	T20B6.3	T20B6.3	0.698128	0.000150742	1.6224	O02049	NP_497637.1	Uncharacterized protein				N.A.	N.A.	N.A.	N.A.	RNA sequencing and microarray studies indicate that T20B6.3 is affected by emr-1, ubc-9, tdp-1, swsn-2.2, jmjd-3.1, jmjd-1.2, hlh-30, daf-12, daf-16, dpy-21, pgl-1, pgl-3, glh-4, glh-1, sma-2, sma-4, rrf-2, and mir-243; RNA sequencing and microarray studies indicate that T20B6.3 is affected by D-glucose, Cry5B, Zidovudine, Atrazine, and adsorbable organic bromine compounds.
WBGene00004150	pqn-67	T16G1.1	0.694616	0.00115337	1.61845	Q9XUQ0	NP_506231.1	Prion-like-(Q/N-rich)-domain-bearing protein				N.A.	N.A.	pharynx, tail	pharynx	The protein product of this gene is predicted to contain a glutamine/asparagine (Q/N)-rich ('prion') domain, by the algorithm of Michelitsch and Weissman (as of the WS77 release of WormBase, i.e., in wormpep77).
WBGene00016892	C53A3.2	C53A3.2	0.693738	0.00269853	1.61747	O44538	NP_504511.1	Uncharacterized protein	dephosphorylation [GO:0016311]	phosphatase activity [GO:0016791]		dauer constitutive, reduced brood size	N.A.	hypodermis, intestine	AFD, ASER, hypodermis, intestine, PLM, Z1, Z4	C53A3.2 is an ortholog of human PDXP (pyridoxal phosphatase) and PGP (phosphoglycolate phosphatase); C53A3.2 is predicted to have phosphatase activity, based on protein domain information; C53A3.2 is expressed in the hypodermis and the intestine.
WBGene00007170	B0393.5	B0393.5	0.690739	1.7166e-05	1.61411	Q17494	NP_497982.2	Uncharacterized protein	cell-matrix adhesion [GO:0007160]	calcium ion binding [GO:0005509]		organism development variant	N.A.	N.A.	AFD, germ line, hypodermis	B0393.5 is predicted to have calcium ion binding activity, based on protein domain information.
WBGene00000678	col-104	F58F6.1	0.690236	0.000136297	1.61355	O44174	NP_500070.1	COLlagen		structural constituent of cuticle [GO:0042302]		N.A.	N.A.	N.A.	AFD, DA neuron, germline precursor cell, hypodermis, intestine, pharyngeal muscle cell, VA neuron	col-104 is an ortholog of human ADIPOQ (adiponectin, C1Q and collagen domain containing) and members of the C1QTNF (C1q and TNF related) family including C1QTNF9B; col-104 is a structural constituent of cuticle, based on protein domain information.
WBGene00022680	ZK180.6	ZK180.6	0.689424	0.000197002	1.61264	Q23447	NP_500584.2, NP_001294435.1	Uncharacterized protein				N.A.	N.A.	N.A.	DA neuron, OLL, PLM, PVD, VA neuron	Microarray and RNA sequencing studies indicate that ZK180.6 is affected by Hydrogen sulfide, Nitric Oxide, Methylmercury hydroxide, 1-methylnicotinamide, Nicotinic acid, Mercuric Chloride, Rotenone, D-glucose, Zidovudine, Resveratrol, single-walled carbon nanotubes, Dafa#1, adsorbable organic bromine compounds, and Sirolimus; microarray and RNA sequencing studies indicate that ZK180.6 is enriched…
WBGene00009706	F44G3.2	F44G3.2	0.683189	0.00246387	1.60568	O45518	NP_507054.1	ARGinine Kinase		ATP binding [GO:0005524]; kinase activity [GO:0016301]		N.A.	N.A.	IL socket cell, intestine, OL socket cell	coelomocyte, germ line, intestine, OLL, PVD	argk-1 is an ortholog of human CKMT2 (creatine kinase, mitochondrial 2), CKM (creatine kinase, M-type), CKB (creatine kinase B) and CKMT1B (creatine kinase, mitochondrial 1B); argk-1 is predicted to have kinase activity, based on protein domain information; argk-1 is expressed in the intestine, IL socket cell, and the OL socket cell.
WBGene00014060	ZK673.4	ZK673.4	0.681429	0.000234107	1.60373	Q09663	NP_496247.2	Uncharacterized protein ZK673.4		DNA binding [GO:0003677]; metal ion binding [GO:0046872]		transgene expression reduced	N.A.	N.A.	ASER	ZK673.4 encodes a protein with a THAP or THAP-like domain; other proteins with such domains include LIN-15A, LIN-15B, LIN-36, and HIM-17 (which all interact with LIN-35/Rb), as well as CDC-14B, CTB-1, GON-14, and ~100 other proteins such as Drosophila P element transposase and human nuclear proapoptotic factor THAP1.
WBGene00017648	ddo-3	F20H11.5	0.675043	0.00225726	1.59664	O01739	NP_498453.1	D-aspartate oxidase 3 (DASOX 3) (DDO-3) (EC 1.4.3.1)	D-amino acid metabolic process [GO:0046416]	D-aspartate oxidase activity [GO:0008445]; FAD binding [GO:0071949]		N.A.	delayed hatching, extended life span, hatching variant, reduced brood size, slow growth	gonadal sheath cell, head, hmc, hypodermis, reproductive system, seminal vesicle, tail, vulva, vulval muscle	germ line, hypodermis, intestine, NSM	ddo-3 encodes a putative secreted D-aspartate oxidase (DASPO), paralogous to DDO-1 and DDO-2; recombinant DDO-3 protein is insoluble when expressed in E. coli, and thus has not yet been tested in vitro for activity; ddo-3 is expressed in a head mesodermal cell, hypodermis, other head cells, and vulva.
WBGene00000853	cut-6	M142.2	0.674829	0.000417272	1.59641	Q21540	NP_499400.2	CUTiclin				alae absent, alae morphology variant, annulae morphology variant, dauer constitutive, dauer cuticle variant, dauer development variant, dumpy	N.A.	hyp3, hyp4, hyp5, hyp6, hyp7 syncytium, hyp8, hyp9, hyp10, hyp11	dopaminergic neuron, germline precursor cell, hypodermis	cut-6 is expressed in the hyp11, hyp10, hyp9, hyp8, hyp6, hyp5, hyp4, hyp3, and the hyp7 syncytium; cut-6 is localized to the alae of collagen and cuticulin-based cuticle extracellular matrix.
WBGene00011006	ugt-47	R04B5.9	0.673121	0.000299865	1.59452	Q21706	NP_505595.2	Putative UDP-glucuronosyltransferase ugt-47 (UDPGT 47) (EC 2.4.1.17)	metabolic process [GO:0008152]	glucuronosyltransferase activity [GO:0015020]		N.A.	N.A.	N.A.	intestine	ugt-47 is an ortholog of human UGT3A2 (UDP glycosyltransferase family 3 member A2) and UGT3A1 (UDP glycosyltransferase family 3 member A1); ugt-47 is predicted to have transferase activity, transferring hexosyl groups, based on protein domain information.
WBGene00015264	B0563.7	B0563.7	0.672666	0.00112461	1.59402	Q11083	NP_509544.1	Uncharacterized calcium-binding protein B0563.7		calcium ion binding [GO:0005509]		N.A.	N.A.	N.A.	neuron	B0563.7 is predicted to have calcium ion binding activity, based on protein domain information.
WBGene00017651	F21A9.2	F21A9.2	0.669149	0.000730207	1.59014	O01527	NP_491204.3	Uncharacterized protein		nucleic acid binding [GO:0003676]		N.A.	N.A.	N.A.	AFD, DA neuron, I5 neuron, intestine, neuron, retrovesicular ganglion, SAB, VA neuron	F21A9.2 is an ortholog of human ZFPM2 (zinc finger protein, FOG family member 2) and ZFPM1 (zinc finger protein, FOG family member 1); F21A9.2 is predicted to have nucleic acid binding activity, based on protein domain information.
WBGene00012859	Y45F3A.1	Y45F3A.1	0.668195	2.34306e-05	1.58908	G5EEK4	NP_499327.1	Uncharacterized protein				sterile progeny	N.A.	N.A.	AVA, DA neuron, germ line, I5 neuron, male, retrovesicular ganglion, SAB, VA neuron	RNA sequencing and microarray studies indicate that Y45F3A.1 is affected by Manganese chloride, Mianserin, Cry5B, Paraquat, Colistin, and Allantoin; proteomic, tiling array, RNA sequencing, and microarray studies indicate that Y45F3A.1 is enriched in the germ line and male and in the AVA, I5, DA, SAB, and retrovesicular ganglion.
WBGene00001575	gei-18	Y37A1B.15	0.666407	0.00283813	1.58712	Q7K7J0	NP_502681.3	GEX Interacting protein				locomotion variant	N.A.	anterior hypodermis, pharynx	amphid sheath cell	gei-18 is expressed in the pharynx and the anterior hypodermis.
WBGene00003813	nrf-6	C08B11.4	0.666042	1.98452e-06	1.58671	Q09225	NP_495680.1	Nose resistant to fluoxetine protein 6 (Protein nrf-6)	lipid transport [GO:0006869]; multicellular organism development [GO:0007275]	lipid binding [GO:0008289]; transferase activity, transferring acyl groups other than amino-acyl groups [GO:0016747]		dumpy, embryonic lethal, organism morphology variant, pattern of transgene expression variant, protein aggregation variant, receptor mediated endocytosis defective, reduced brood size, sluggish	N.A.	hyp1, hyp2, hyp3, hyp4, hyp5, hyp6, hyp7 syncytium, hyp8, hyp9, hyp10, hyp11, hyp12, intestine	gon_male_dtc anterior, gon_male_dtc posterior, intestine, Z1, Z1.p, Z4, Z4.a	nrf-6 encodes a protein with 12 predicted transmembrane domains that is highly similar to NDG-4 and affects embryonic viability, yolk transport, locomotion, body morphology, and affects sensitivity to fluoxetine with respect to nose-contraction response in a common pathway with ndg-4 and nrf-5; expressed in the most anterior cells of the hypodermis and in the intestine and is required in the inte…
WBGene00017678	asp-12	F21F8.4	0.664945	0.000143595	1.58551	O01531	NP_505134.1	ASpartyl Protease	innate immune response [GO:0045087]; protein catabolic process [GO:0030163]; proteolysis [GO:0006508]	aspartic-type endopeptidase activity [GO:0004190]		cell death variant, locomotion variant, protein aggregation variant, protein degradation variant, transgene subcellular localization variant	N.A.	N.A.	intestine	asp-12 is an ortholog of human pgc (progastricsin), PGA3 (pepsinogen 3, group I (pepsinogen A)), PGA5 (pepsinogen 5, group I (pepsinogen A)), PGA4 (pepsinogen 4, group I (pepsinogen A)), REN (renin), NAPSA (napsin A aspartic peptidase) and RP11-295K3.1 and members of the CTS (Cathepsins) family including CTSE; asp-12 is involved in innate immune response[HEP]; asp-12 is predicted to have aspartic…
WBGene00020003	R11E3.1	R11E3.1	0.660155	0.0022028	1.58025	Q9TYX4	NP_500644.2	Tyrosine-protein kinase (EC 2.7.10.2)	cell differentiation [GO:0030154]; cell migration [GO:0016477]; innate immune response [GO:0045087]; peptidyl-tyrosine autophosphorylation [GO:0038083]; regulation of cell proliferation [GO:0042127]; transmembrane receptor protein tyrosine kinase signaling pathway [GO:0007169]	ATP binding [GO:0005524]; non-membrane spanning protein tyrosine kinase activity [GO:0004715]; signaling receptor binding [GO:0005102]		N.A.	N.A.	N.A.	germ line, hypodermis, male	R11E3.1 is an ortholog of human FES (FES proto-oncogene, tyrosine kinase) and FER (FER tyrosine kinase); R11E3.1 is predicted to have protein tyrosine kinase activity, based on protein domain information.
WBGene00009241	F28H7.8	F28H7.8	0.654124	0.000802078	1.57366	Q19895	NP_505746.2	CRAL-TRIO domain-containing protein F28H7.8				N.A.	N.A.	N.A.	dopaminergic neuron, hypodermis, PLM	RNA sequencing and microarray studies indicate that F28H7.8 is affected by Multi-walled carbon nanotubes, Zidovudine, single-walled carbon nanotubes, Dafa#1, and Sirolimus; tiling array and RNA sequencing studies indicate that F28H7.8 is enriched in the hypodermis and in the dopaminergic and PLM neurons.
WBGene00019906	R05G9R.1	R05G9R.1	0.651046	0.000699595	1.57031	Q965Y7	NP_495316.3	Uncharacterized protein				N.A.	N.A.	N.A.	hypodermis, PLM	Tiling array, microarray, and RNA sequencing studies indicate that R05G9R.1 is affected by rsr-2, bar-1, ubc-9, daf-16, npr-1, jmjd-3.1, let-418, chd-3, dpy-21, daf-12, lin-22, smg-2, cox-5B, mir-243, crh-1, octr-1, tdp-1, and mir-35; RNA sequencing and microarray studies indicate that R05G9R.1 is affected by 1-methylnicotinamide, Methylmercuric chloride, Multi-walled carbon nanotubes, Zidovudine…
WBGene00000645	col-69	K01A2.7	0.644887	0.000674278	1.56362	Q9TZ57	NP_493702.1	COLlagen		structural constituent of cuticle [GO:0042302]		N.A.	N.A.	N.A.	N.A.	col-69 is an ortholog of human SFTPD (surfactant protein D); col-69 is a structural constituent of cuticle, based on protein domain information.
WBGene00015278	C01B10.3	C01B10.3	0.639018	9.90298e-05	1.55727	Q17543	NP_501020.2	Uncharacterized protein	inositol phosphate dephosphorylation [GO:0046855]; inositol phosphate-mediated signaling [GO:0048016]	inositol-polyphosphate 5-phosphatase activity [GO:0004445]		N.A.	N.A.	pharyngeal muscle cell, rectal epithelium	ASER, PLM	C01B10.3 encodes a paralog of IPP-5, and thus may functionally overlap with ipp-5 in vivo.
WBGene00007868	C32H11.5	C32H11.5	0.636354	0.000711845	1.5544	Q9XUH6	NP_502467.1	Uncharacterized protein				extended life span, mitochondrial membrane potential reduced	N.A.	N.A.	ALM, GABAergic neuron, pharynx, PLM	RNA sequencing and microarray studies indicate that C32H11.5 is affected by 1-methylnicotinamide, Nicotinic acid, D-glucose, Zidovudine, and adsorbable organic bromine compounds; microarray and RNA sequencing studies indicate that C32H11.5 is enriched in the pharynx and in the ALM, PLM, and GABAergic neurons.
WBGene00000250	bir-2	C50B8.2	0.635545	0.00105083	1.55352	G5ECJ5	NP_506362.1	Baculoviral IAP repeat-containing protein bir-2	inhibition of cysteine-type endopeptidase activity involved in apoptotic process [GO:1990001]; mitotic spindle assembly [GO:0090307]; regulation of signal transduction [GO:0009966]	cysteine-type endopeptidase inhibitor activity [GO:0004869]; metal ion binding [GO:0046872]; ubiquitin-protein transferase activity [GO:0004842]		embryonic lethal, fewer germ cells, life span variant, no oocytes, nuclear appearance variant, sperm absent	N.A.	N.A.	GABAergic neuron, germ line, germline precursor cell	The bir-2 gene encodes a protein with two BIR domains that may be involved in apoptosis.
WBGene00000893	cyn-17	ZC250.1	0.634994	0.000144856	1.55293	A9D417	NP_001123070.1, NP_001123071.1	CYclophyliN		peptidyl-prolyl cis-trans isomerase activity [GO:0003755]		N.A.	N.A.	N.A.	germ line, pharynx	cyn-17 is predicted to have peptidyl-prolyl cis-trans isomerase activity, based on protein domain information.
WBGene00009430	F35E12.6	F35E12.6	0.627589	2.51478e-07	1.54498	O02358	NP_506401.2	Uncharacterized protein	defense response to Gram-negative bacterium [GO:0050829]; innate immune response [GO:0045087]			N.A.	N.A.	N.A.	intestine, neuron, OLL, pharyngeal muscle cell, PVD	F35E12.6 is involved in innate immune response[HEP].
WBGene00001853	hil-2	Y73B6BL.9	0.621504	1.9798e-09	1.53848	P15796	NP_741417.4, NP_741418.2	Histone H1.2 (Histone H1-like protein 2)	nucleosome assembly [GO:0006334]	DNA binding [GO:0003677]		gonad morphology variant, high incidence male progeny, meiosis variant, meiotic progression prophase variant	N.A.	N.A.	germ line, NSM	hil-2 is an ortholog of human H1F0 (H1 histone family member 0); hil-2 is predicted to have DNA binding activity, based on protein domain information.
WBGene00015333	C02C2.4	C02C2.4	0.620456	0.000347065	1.53736	P34272	NP_498709.2	Uncharacterized transporter slc-17.3	anion transport [GO:0006820]; sodium ion transport [GO:0006814]; transmembrane transport [GO:0055085]	symporter activity [GO:0015293]; transmembrane transporter activity [GO:0022857]		N.A.	N.A.	intestine, nervous system, pharyngeal neuron	intestine, OLL, PVD	slc-17.3 is an ortholog of members of the human SLC (Solute carriers) family including SLC17A3; slc-17.3 is expressed in the nervous system and the intestine.
WBGene00015861	C16D9.6	C16D9.6	0.615828	0.000456628	1.53244	Q22900	NP_505126.2	Glycoprotein-N-acetylgalactosamine 3-beta-galactosyltransferase 1 (EC 2.4.1.122)	O-glycan processing, core 1 [GO:0016267]	glycoprotein-N-acetylgalactosamine 3-beta-galactosyltransferase activity [GO:0016263]; metal ion binding [GO:0046872]		N.A.	N.A.	N.A.	ASER, body wall muscle cell, dopaminergic neuron, neuron	C16D9.6 is an ortholog of human C1GALT1C1 (C1GALT1 specific chaperone 1) and C1GALT1C1L (C1GALT1-specific chaperone 1 like); C16D9.6 is predicted to have transferase activity, transferring glycosyl groups, based on protein domain information.
WBGene00022747	ZK470.6	ZK470.6	0.614158	0.00209831	1.53066	Q23509	NP_508709.1	Uncharacterized protein				N.A.	N.A.	N.A.	arcade cell, muscle cell, pharyngeal-intestinal valve cell	RNA sequencing and microarray studies indicate that ZK470.6 is affected by 1-methylnicotinamide, Resveratrol, Fluoranthene, Selenium, Colistin, and Sirolimus; RNA sequencing and microarray studies indicate that ZK470.6 is enriched in the arcade cell, pharyngeal-intestinal valve cell, and muscle cell.
WBGene00021192	Y14H12B.2	Y14H12B.2	0.613054	0.00047561	1.52949	Q9TYP8	NP_494697.1	Uncharacterized protein				N.A.	N.A.	N.A.	AVA, AVD, AVE, AVG, germ line, germline precursor cell, PVC, RIM	RNA sequencing and microarray studies indicate that Y14H12B.2 is affected by Rotenone, Manganese chloride, Zidovudine, Hydrolyzable Tannins, Paraquat, Sirolimus, and Triclosan; tiling array and RNA sequencing studies indicate that Y14H12B.2 is enriched in the germline precursor cell and germ line and in the AVG, RIM, PVC, AVA, AVD, and AVE neurons.
WBGene00001854	hil-3	F22F1.1	0.61117	9.57206e-06	1.5275	Q19743	NP_509375.1	Histone H1.3 (Histone H1-like protein 3)	nucleosome assembly [GO:0006334]	DNA binding [GO:0003677]		peptide uptake by intestinal cell decreased	N.A.	Cell, tail	body wall musculature, germ line, intestine, neuron, NSM, OLL, pharynx, PLM, PVD	hil-3 is an ortholog of human H1F0 (H1 histone family member 0); hil-3 is predicted to have DNA binding activity, based on protein domain information; hil-3 is expressed in several tissues including the tail.
WBGene00002021	hsp-17	F52E1.7	0.610497	9.32726e-07	1.52679	Q20660	NP_001023957.1, NP_001023958.1	Heat Shock Protein				N.A.	N.A.	N.A.	ASER, FLP, intestine, OLL, PVD	hsp-17 encodes a heat shock protein that is a member of the hsp16/hsp20/alpha-crystallin family of heat shock proteins; by homology, HSP-17 is predicted to function as a molecular chaperone that protects cells from heat-induced protein aggregation and denaturation.
WBGene00020153	nhr-212	T01G6.6	0.609969	0.000365511	1.52623	B1GRK7	NP_503217.2, NP_001122995.1	Nuclear Hormone Receptor family	transcription, DNA-templated [GO:0006351]	DNA binding transcription factor activity [GO:0003700]; sequence-specific DNA binding [GO:0043565]; zinc ion binding [GO:0008270]		N.A.	N.A.	N.A.	coelomocyte, intestine, pharyngeal muscle cell, Z1, Z4	nhr-212 is predicted to have DNA-binding transcription factor activity, sequence-specific DNA binding activity, and zinc ion binding activity, based on protein domain information.
WBGene00005602	srj-14	C03G6.3	0.609656	0.000945339	1.5259	O01456	NP_504884.1	Serpentine Receptor, class J	olfactory behavior [GO:0042048]	G-protein coupled olfactory receptor activity [GO:0038022]		N.A.	N.A.	N.A.	N.A.	RNA sequencing, microarray, and tiling array studies indicate that srj-14 is affected by wdr-23, emr-1, lem-2, clk-1, daf-2, glp-1, npr-1, cec-4, mir-34, elli-1, daf-16, emb-4, sma-2, sma-4, lin-22, smg-2, tax-6, tdp-1, and nhr-25; microarray and RNA sequencing studies indicate that srj-14 is affected by Tryptophan, Rotenone, single-walled carbon nanotubes, and Sirolimus.
WBGene00011575	madf-4	T07C12.11	0.606681	0.00191215	1.52275	G5EGG9	NP_505565.3	MADF domain transcription factor	regulation of transcription, DNA-templated [GO:0006355]; transcription, DNA-templated [GO:0006351]	DNA binding [GO:0003677]		fat content reduced, transgene expression reduced	N.A.	N.A.	AFD, dopaminergic neuron, neuron	Tiling array, RNA sequencing, and microarray studies indicate that madf-4 is affected by hpl-2, prg-1, jmjd-3.1, pgl-1, pgl-3, glh-4, glh-1, alg-1, alg-2, sir-2.1, ain-1, ahr-1, fbf-1, daf-19, tdp-1, pmk-1, and eat-2; microarray studies indicate that madf-4 is affected by Sirolimus; tiling array, RNA sequencing, and microarray studies indicate that madf-4 is enriched in neurons including the dopa…
WBGene00000677	col-103	F56B3.1	0.602982	0.000220865	1.51885	O45114	NP_499982.1	COLlagen		structural constituent of cuticle [GO:0042302]		body wall muscle myosin organization defective, locomotion variant	N.A.	N.A.	germ line, male-specific, OLL, PVD	col-103 encodes a collagen.
WBGene00021519	Y41D4B.17	Y41D4B.17	0.60218	0.000443435	1.51801	Q95Y18	NP_500099.1	Uncharacterized protein	innate immune response [GO:0045087]			N.A.	N.A.	N.A.	gon_male_dtc anterior, gon_male_dtc posterior, intestine, OLL, PVD, Z1.p, Z4.a	Microarray and RNA sequencing studies indicate that Y41D4B.17 is affected by Methylmercuric chloride, Mianserin, D-glucopyranose, Cry5B, Quercetin, Humic substances, Colistin, and Sirolimus; microarray, tiling array, and RNA sequencing studies indicate that Y41D4B.17 is enriched in the intestine, gon_male_dtc posterior, gon_male_dtc anterior, Z1.p, and Z4.a and in the PVD and OLL neurons.
WBGene00021743	Y50D4B.4	Y50D4B.4	0.600617	0.00120045	1.51637	A0A0K3ASH9	NP_001300270.1, NP_001300267.1, NP_001300271.1, NP_001300272.1, NP_001300269.1, NP_001300268.1	Uncharacterized protein	glycoprotein catabolic process [GO:0006516]			N.A.	N.A.	N.A.	cephalic sheath cell, hypodermis, OLL, PVD	RNA sequencing, microarray, and proteomic studies indicate that Y50D4B.4 is affected by Rotenone, Tunicamycin, Manganese chloride, D-glucose, Nicotine, Zidovudine, Resveratrol, Chlorpyrifos, Diazinon, Quercetin, Humic substances, Paraquat, Dafa#1, and Sirolimus; microarray and tiling array studies indicate that Y50D4B.4 is enriched in the cephalic sheath cell and hypodermis and in the PVD and OLL…
WBGene00011537	T06E4.10	T06E4.10	0.600451	0.00330573	1.51619	Q22264	NP_505480.2	Uncharacterized protein				N.A.	N.A.	N.A.	intestine	T06E4.10 encodes an uncharacterized protein that is proline- and alanine-rich and contains a predicted signal sequence; as loss of T06E4.10 results in no obvious defects, the precise role of its gene product in C. elegans development and/or behavior is not yet known.
WBGene00003533	nas-14	F09E8.6	0.600409	0.000931946	1.51615	Q19269	NP_502533.2	Zinc metalloproteinase nas-14 (EC 3.4.24.-) (Nematode astacin 14)		metalloendopeptidase activity [GO:0004222]; zinc ion binding [GO:0008270]		N.A.	N.A.	marginal cell, pharyngeal muscle cell, pharynx	OLL, PVD	nas-14 encodes an astacin-like metalloprotease; large-scale expression studies reveal that a nas-14::GFP promoter fusion is expressed in the pharynx.
WBGene00000084	aex-1	D2030.10	0.598992	0.0013038	1.51466	G5EEU3	NP_740891.1, NP_001021074.1	C2 domain-containing protein aex-1	defecation [GO:0030421]; lipid transport involved in lipid storage [GO:0010877]; locomotion [GO:0040011]; male mating behavior [GO:0060179]; oviposition [GO:0018991]; positive regulation of acetylcholine secretion, neurotransmission [GO:0014057]; positive regulation of defecation [GO:2000294]; positive regulation of intestinal lipid absorption [GO:1904731]; positive regulation of triglyceride tra…			expulsion variant, locomotion variant, protein degradation variant	aboc expulsion missing, constipated, defecation variant	amphid neuron, body wall musculature, intestine	intestine	aex-1 encodes a novel, C2 calcium-binding domain protein that is similar to human BAP3 proteins and rat Munc13; in C. elegans, AEX-1 functions in retrograde signaling to regulate presynaptic activity and localization of the synaptic vesicle fusion protein UNC-13; AEX-1 is required for the defecation motor program, specifically the anterior body wall and enteric muscle contractions, and for normal…
WBGene00015218	B0507.1	B0507.1	0.598166	0.000480203	1.51379	Q22886	NP_505262.1	Uncharacterized protein				N.A.	N.A.	gon_herm_dtc_A, gon_herm_dtc_P, Pharyngeal gland cell, pharyngeal-intestinal valve, rectal gland cell, spermatheca	DA neuron, I5 neuron, OLL, pharynx, PVD, retrovesicular ganglion, SAB, VA neuron	B0507.1 is expressed in the gon_herm_dtc_P, gon_herm_dtc_A, spermatheca, pharyngeal-intestinal valve, pharyngeal gland cell, and the rectal gland cell.
WBGene00022695	ZK328.6	ZK328.6	0.596273	0.000121312	1.51181	Q8TA81	NP_498314.2	Uncharacterized F-box protein ZK328.6		DNA binding transcription factor activity [GO:0003700]		N.A.	N.A.	N.A.	PLM	ZK328.6 is an ortholog of members of the human TBX (T-boxes) family including TBX5; ZK328.6 is predicted to have DNA-binding transcription factor activity, based on protein domain information.
WBGene00000667	col-92	W05B2.6	0.593815	0.000330137	1.50923	Q9XVG3	NP_499408.1	COLlagen		structural constituent of cuticle [GO:0042302]		dumpy, exploded through vulva, extended life span, larval arrest, larval lethal, locomotion variant, organism morphology variant, pathogen susceptibility increased	N.A.	hypodermis	N.A.	col-92 is an ortholog of human SFTPD (surfactant protein D); col-92 is a structural constituent of cuticle, based on protein domain information; col-92 is expressed in the hypodermis.
WBGene00012942	Y47D3B.6	Y47D3B.6	0.593731	0.000140309	1.50914	Q9U2B8	NP_499471.1	Uncharacterized protein				N.A.	N.A.	N.A.	DA neuron, pharyngeal muscle cell, VA neuron	RNA sequencing and microarray studies indicate that Y47D3B.6 is affected by Methylmercury hydroxide, 1-methylnicotinamide, Methylmercuric chloride, Rotenone, Neurotoxins, Zidovudine, Resveratrol, Atrazine, Cadmium, Chlorpyrifos, Hydrolyzable Tannins, single-walled carbon nanotubes, Colistin, Dafa#1, adsorbable organic bromine compounds, and Sirolimus; tiling array and microarray studies indicate …
WBGene00000275	bub-1	R06C7.8	0.5934	6.85948e-07	1.5088	Q21776	NP_492051.1	Mitotic checkpoint serine/threonine-protein kinase bub-1 (EC 2.7.11.1) (Budding uninhibited by benzimidazole 1)	attachment of spindle microtubules to kinetochore involved in meiotic chromosome segregation [GO:0051316]; cell division [GO:0051301]; embryonic morphogenesis [GO:0048598]; gonad development [GO:0008406]; meiotic chromosome separation [GO:0051307]; meiotic sister chromatid cohesion, centromeric [GO:0051754]; meiotic spindle midzone assembly [GO:0051257]; meiotic spindle organization [GO:0000212];…	ATP binding [GO:0005524]; protein kinase activity [GO:0004672]; protein serine/threonine kinase activity [GO:0004674]		accumulated germline cell corpses, antibody staining reduced, antibody subcellular localization variant, apoptosis reduced, apoptosis variant, embryonic lethal, exploded through vulva, germ cell mitosis variant, gonad development variant, larval lethal, locomotion variant, maternal sterile, meiotic chromosome segregation variant, multiple cytoplasmic cavities early emb, multiple nuclei early emb,…	aldicarb hypersensitive, lethal, locomotion variant, sterile	AB, seam cell	germ line	bub-1 encodes a serine/threonine kinase orthologous to Saccharomyces cerevisiae BUB1 which is required for proper function of the mitotic spindle assembly checkpoint and human BUB1 (OMIM:602452) which is mutated in some colorectal cancers; BUB-1 activity is required at several stages of development, including embryogenesis; BUB-1 is expressed predominantly in the anterior of the embryo and in hyp…
WBGene00017073	D2096.6	D2096.6	0.5893	0.00176626	1.50452	Q19005	NP_501420.1	Uncharacterized protein D2096.6	endoplasmic reticulum unfolded protein response [GO:0030968]			larval arrest, lethal, reduced brood size, sick	N.A.	epithelial cell, marginal cell, pharyngeal muscle cell, pharynx	DA neuron, hypodermis, pharynx, VA neuron	D2096.6 is involved in endoplasmic reticulum unfolded protein response[HEP]; D2096.6 is expressed in the epithelial cell and the pharynx.
WBGene00044410	F48E8.8	F48E8.8	0.580204	0.00318963	1.49506	A0A0K3AX60	NP_001299872.1, NP_001299873.1, NP_001033364.1	Uncharacterized protein				N.A.	N.A.	N.A.	ASER, DA neuron, excretory cell, hypodermis, intestine, muscle cell, neuron, VA neuron	RNA sequencing and microarray studies indicate that F48E8.8 is affected by lin-39, csr-1, mir-34, and sma-4; tiling array and RNA sequencing studies indicate that F48E8.8 is enriched in the excretory cell, hypodermis, muscle cell, and intestine and in neurons including the DA, VA, and ASER neurons.
WBGene00010573	K04H4.2	K04H4.2	0.579859	0.000639634	1.4947	P34504	NP_001022664.4, NP_499058.3, NP_499059.2	Uncharacterized protein K04H4.2	chitin metabolic process [GO:0006030]	chitin binding [GO:0008061]		cord commissures fail to reach target, dendrite development variant, larval arrest, larval lethal, locomotion variant, reduced brood size, slow growth, transgene expression increased	lethal, sterile	N.A.	OLL, pharynx, PVD	K04H4.2 encodes, by alternative splicing, three proteins ranging from 628 to 1446 residues in length; K04H4.2 proteins are predicted to be secreted, with an N-terminal chitin-binding peritrophin-A domain followed by up to 15 cysteine-rich domains; the general organization of K04H4.2 protein resembles that of T10E10.4; in mass RNAi assays, K04H4.2 is required for larval growth and locomotion; K04H…
WBGene00019109	F59E11.2	F59E11.2	0.568423	0.0007163	1.4829	O16764	NP_505327.2	Uncharacterized protein				N.A.	N.A.	N.A.	amphid sheath cell	F59E11.2 is an ortholog of human DHRS1 (dehydrogenase/reductase 1); microarray, tiling array, and RNA sequencing studies indicate that F59E11.2 is affected by cyc-1, sma-2, hpl-2, daf-2, mir-34, sma-4, sir-2.1, and nuo-6; RNA sequencing and microarray studies indicate that F59E11.2 is affected by Rotenone and Resveratrol; RNA sequencing studies indicate that F59E11.2 is enriched in the amphid she…
WBGene00022033	Y65B4BL.1	Y65B4BL.1	0.56667	0.000368891	1.4811	H1ZUX7	NP_001248866.1, NP_001293277.1	Uncharacterized protein				growth variant	N.A.	N.A.	hypodermis, OLL, PVD	RNA sequencing and microarray studies indicate that Y65B4BL.1 is affected by Methylmercury hydroxide, 1-methylnicotinamide, Rotenone, Manganese chloride, D-glucose, Zidovudine, Chlorpyrifos, and Sirolimus; microarray and tiling array studies indicate that Y65B4BL.1 is enriched in the hypodermis and in the PVD and OLL neurons.
WBGene00011446	T04F8.8	T04F8.8	0.566617	3.8292e-05	1.48105	Q22168	NP_509945.1, NP_001123179.1	Uncharacterized protein				N.A.	N.A.	N.A.	dopaminergic neuron, GABAergic neuron	RNA sequencing and microarray studies indicate that T04F8.8 is affected by Rotenone, Manganese chloride, D-glucose, Cry5B, Zidovudine, Progesterone, Resveratrol, Deoxyglucose, Acrylamide, Atrazine, Cadmium, Quercetin, Hydrolyzable Tannins, and Sirolimus; tiling array studies indicate that T04F8.8 is enriched in the dopaminergic and GABAergic neurons.
WBGene00008376	D1054.9	D1054.9	0.565622	0.00030304	1.48003	Q9XVV1	NP_001256255.1, NP_001023745.3, NP_001023746.3, NP_001256252.1, NP_505756.4, NP_872196.2, NP_001256254.1, NP_505757.4, NP_001256253.1	Uncharacterized protein				N.A.	N.A.	N.A.	GABAergic neuron, pharynx	RNA sequencing and microarray studies indicate that D1054.9 is affected by 1-methylnicotinamide, Manganese chloride, D-glucose, Zidovudine, Resveratrol, Colistin, Sirolimus, and Triclosan; microarray studies indicate that D1054.9 is enriched in the pharynx and in the GABAergic neurons.
WBGene00010595	haao-1	K06A4.5	0.564808	4.0895e-05	1.47919	Q19341	NP_505450.1	3-hydroxyanthranilate 3,4-dioxygenase (EC 1.13.11.6) (3-hydroxyanthranilate oxygenase) (3-HAO) (3-hydroxyanthranilic acid dioxygenase) (HAD)	NAD biosynthetic process [GO:0009435]	3-hydroxyanthranilate 3,4-dioxygenase activity [GO:0000334]; iron ion binding [GO:0005506]		dauer lifespan extended, lysosome-related organelle morphology variant, RAB-11 recycling endosome morphology variant, transgene subcellular localization variant	metabolite content increased	N.A.	AFD, cephalic sheath cell, germline precursor cell, hypodermis	haao-1 is an ortholog of human HAAO (3-hydroxyanthranilate 3,4-dioxygenase); haao-1 is predicted to have 3-hydroxyanthranilate 3,4-dioxygenase activity and iron ion binding activity, based on protein domain information.
WBGene00011094	R07B7.10	R07B7.10	0.561965	0.000113504	1.47628	Q21800	NP_506030.2	Uncharacterized protein	mitochondrial transport [GO:0006839]	transmembrane transporter activity [GO:0022857]		N.A.	N.A.	N.A.	body wall musculature, hypodermis, intestine, pharyngeal muscle cell, pharynx, PLM	R07B7.10 is an ortholog of human SLC25A47 (solute carrier family 25 member 47); RNA sequencing and microarray studies indicate that R07B7.10 is affected by htz-1, npr-1, hsf-1, daf-12, daf-16, dpy-21, pgl-1, pgl-3, glh-4, glh-1, alg-2, sma-2, sir-2.1, and tax-6; RNA sequencing and microarray studies indicate that R07B7.10 is affected by Rotenone, Cry5B, Sirolimus, and Allantoin; chronogram analys…
WBGene00020846	T27A10.6	T27A10.6	0.561914	0.000255672	1.47623	Q22822	NP_508617.2	Uncharacterized protein				N.A.	N.A.	seam cell	germline precursor cell, hypodermis, male-specific, OLL, PVD	T27A10.6 is expressed in the seam cell.
WBGene00000681	col-107	C34H4.4	0.560944	0.000586619	1.47523	Q86S35	NP_500094.1, NP_872105.1	COLlagen		structural constituent of cuticle [GO:0042302]		N.A.	N.A.	N.A.	AFD, hypodermis	col-107 is an ortholog of human SFTPD (surfactant protein D); col-107 is a structural constituent of cuticle, based on protein domain information.
WBGene00045411	C25F9.11	C25F9.11	0.559807	0.000259752	1.47407	A5JYW3	NP_001122859.1	Uncharacterized protein				N.A.	N.A.	N.A.	dopaminergic neuron, OLL, PVD	RNA sequencing and microarray studies indicate that C25F9.11 is affected by Ethanol, Nitric Oxide, D-glucose, Cadmium Chloride, and Colistin; tiling array studies indicate that C25F9.11 is enriched in the dopaminergic, PVD, and OLL neurons.
WBGene00009157	F26E4.2	F26E4.2	0.556244	0.00155982	1.47044	O18686	NP_492592.1	Uncharacterized protein				cell division variant, mitotic spindle defective early emb, vulvaless	N.A.	N.A.	ASER, excretory cell, GABAergic neuron, germline precursor cell, hypodermis, PLM	Microarray and RNA sequencing studies indicate that F26E4.2 is affected by Hydrogen sulfide, Levamisole, Zidovudine, Chlorpyrifos, Diazinon, Humic substances, and Sirolimus; tiling array, RNA sequencing, and proteomic studies indicate that F26E4.2 is enriched in the excretory cell, germline precursor cell, and hypodermis and in the GABAergic, ASER, and PLM neurons.
WBGene00019908	R05H11.2	R05H11.2	0.555506	0.0037699	1.46968	Q8IFZ7	NP_871708.3	Uncharacterized protein				N.A.	N.A.	N.A.	intestine	RNA sequencing and microarray studies indicate that R05H11.2 is affected by Manganese chloride, Diazinon, single-walled carbon nanotubes, and Sirolimus; microarray studies indicate that R05H11.2 is enriched in the intestine.
WBGene00021690	Y48G8AL.12	Y48G8AL.12	0.553449	0.00226821	1.46759	Q9BL10	NP_490835.1	Uncharacterized protein				N.A.	N.A.	N.A.	AFD, ASER, PLM	Microarray and RNA sequencing studies indicate that Y48G8AL.12 is affected by Aldicarb, 1-methylnicotinamide, and Nicotinic acid; RNA sequencing studies indicate that Y48G8AL.12 is enriched in the AFD, ASER, and PLM neurons.
WBGene00018965	F56D2.3	F56D2.3	0.548876	0.000180602	1.46295	A0A2C9C2U4	NP_498199.1	Uncharacterized protein				organism development variant	N.A.	N.A.	OLL, pharynx, PVD	RNA sequencing and microarray studies indicate that F56D2.3 is affected by 1-methylnicotinamide, Manganese chloride, D-glucose, Zidovudine, Resveratrol, Chlorpyrifos, Diazinon, Quercetin, Colistin, and Dafa#1; microarray and RNA sequencing studies indicate that F56D2.3 is enriched in the pharynx and in the PVD and OLL neurons.
WBGene00018366	F42H10.2	F42H10.2	0.54626	0.000584664	1.4603	P34415	NP_498876.1	Uncharacterized protein F42H10.2				N.A.	lethal, sterile	N.A.	DA neuron, germ line, germline precursor cell, I5 neuron, neuron, retrovesicular ganglion, SAB, VA neuron	F42H10.2 is an ortholog of human CHCHD4 (coiled-coil-helix-coiled-coil-helix domain containing 4); microarray and RNA sequencing studies indicate that F42H10.2 is affected by Hydrogen sulfide, Rotenone, Bisphenol S, Fluoranthene, Chlorpyrifos, Diazinon, and Sirolimus; tiling array, RNA sequencing, and microarray studies indicate that F42H10.2 is enriched in the germline precursor cell and germ li…
WBGene00007744	C26D10.3	C26D10.3	0.543019	0.00373725	1.45702	Q18213	NP_495754.3	Uncharacterized protein		oxidoreductase activity [GO:0016491]		larval lethal	N.A.	N.A.	germ line	C26D10.3 is an ortholog of human PYROXD1 (pyridine nucleotide-disulphide oxidoreductase domain 1); C26D10.3 is predicted to have oxidoreductase activity, based on protein domain information.
WBGene00019757	memb-2	M03E7.5	0.540033	0.000346441	1.45401	Q21499	NP_504484.2	Golgi SNAP receptor complex member 2	ER to Golgi vesicle-mediated transport [GO:0006888]; Golgi to vacuole transport [GO:0006896]; intra-Golgi vesicle-mediated transport [GO:0006891]; protein targeting to vacuole [GO:0006623]; retrograde transport, endosome to Golgi [GO:0042147]; vesicle fusion with Golgi apparatus [GO:0048280]	SNAP receptor activity [GO:0005484]; SNARE binding [GO:0000149]		embryonic lethal	N.A.	N.A.	AFD, DA neuron, germ line, I5 neuron, intestine, retrovesicular ganglion, SAB, VA neuron	memb-2 is an ortholog of human GOSR2 (golgi SNAP receptor complex member 2) and RP11-156P1.2; memb-2 is predicted to have SNAP receptor activity, based on protein domain information.
WBGene00003623	nhr-25	F11C1.6	0.534899	0.000412951	1.44884	Q19345	NP_001024551.1, NP_001024550.1	Nuclear hormone receptor family member nhr-25	hormone-mediated signaling pathway [GO:0009755]; molting cycle, collagen and cuticulin-based cuticle [GO:0018996]; multicellular organism development [GO:0007275]; positive regulation of transcription by RNA polymerase II [GO:0045944]; tissue development [GO:0009888]; transcription, DNA-templated [GO:0006351]	armadillo repeat domain binding [GO:0070016]; chromatin binding [GO:0003682]; nuclear receptor activity [GO:0004879]; steroid hormone receptor activity [GO:0003707]; transcription regulatory region sequence-specific DNA binding [GO:0000976]; zinc ion binding [GO:0008270]		accumulated germline cell corpses, alae morphology variant, annulae morphology variant, apoptosis variant, avoids bacterial lawn, branched adult alae, breaks in alae, cell fate specification variant, clear, dauer development variant, developmental delay, developmental timing variant, distal tip cell development variant, distal tip cell migration variant, distal tip cell morphology variant, ectopi…	developmental timing variant, embryonic lethal, gene expression level high, gene expression level reduced, pathogen susceptibility increased, phasmid dye filling defect, precocious alae, precocious seam cell fusion	Anchor cell, excretory duct cell, excretory pore, gonad, hyp1, hyp2, hyp3, hyp4, hyp5, hyp6, hyp7 syncytium, hyp8, hyp9, hyp10, hyp11, hyp12, hypodermis, intestine, neuroblast, P1, P1.p, P2, P2.p, P3, P3.p hermaphrodite, P4, P4.p hermaphrodite, P5, P5.p hermaphrodite, P6, P6.p hermaphrodite, P7, P7.p hermaphrodite, P8, P8.p hermaphrodite, P9, P9.p, P10, P10.p, P11, P11.p, P12, P12.p, pharynx, rec…	body wall musculature, gon_male_dtc anterior, gon_male_dtc posterior, PLM, Z1.p, Z4.a	nhr-25 encodes a nuclear hormone receptor orthologous to Drosophila Ftz-F1; NHR-25 is required for embryogenesis, molting, vulval and gonadal development, and hypodermal expression of acn-1; nhr-25 is expressed in gonads and loaded into embryos as a maternal transcript; nhr-25 is zygotically expressed in progeny of the E cell, and then in hypodermis and gut; the role of NHR-25 in molting may be e…
WBGene00020583	T19D12.9	T19D12.9	0.527346	0.00266366	1.44127	O76837	NP_495353.1	Uncharacterized protein	anion transport [GO:0006820]; transmembrane transport [GO:0055085]	transmembrane transporter activity [GO:0022857]		N.A.	N.A.	N.A.	excretory cell, GABAergic neuron, intestine, neuron	Microarray and RNA sequencing studies indicate that T19D12.9 is affected by clk-1, wdr-23, eat-2, tatn-1, daf-2, daf-16, mir-34, and alg-1; RNA sequencing and microarray studies indicate that T19D12.9 is affected by 1-methylnicotinamide, Rotenone, D-glucose, Resveratrol, Fluoranthene, Chlorpyrifos, and Diazinon; tiling array and microarray studies indicate that T19D12.9 is enriched in the excreto…
WBGene00004147	larp-5	T12F5.5	0.524521	0.000781808	1.43846	O44760	NP_491209.3, NP_871824.3	LARP (RNA binding La related protein) homolog		RNA binding [GO:0003723]		N.A.	dendritic termini number reduced	neuron, PVDL, PVDR	AFD, OLL, PVD	larp-5 encodes an La-related protein containing an La RNA-binding motif and a conserved LARP5 domain; LARP-5 is most closely related to the Larp5 family of metazoan-specific La proteins that includes human and mouse Larp5 as well as Drosophila melanogaster CG11505.
WBGene00000156	apr-1	K04G2.8	0.521878	2.82903e-05	1.43582	Q21227	NP_001021547.1, NP_492217.2, NP_001334202.1	Adenomatous polyposis coli protein-related protein 1 (APC-related protein 1)	asymmetric cell division [GO:0008356]; cell cycle [GO:0007049]; cell fate specification [GO:0001708]; embryo development ending in birth or egg hatching [GO:0009792]; embryonic digestive tract morphogenesis [GO:0048557]; embryonic morphogenesis [GO:0048598]; endodermal cell fate specification [GO:0001714]; endoderm development [GO:0007492]; engulfment of apoptotic cell [GO:0043652]; negative regu…	beta-catenin binding [GO:0008013]; protein N-terminus binding [GO:0047485]		AB lineage variant, amphid phasmid morphology variant, antibody staining variant, asymmetric cell division variant, cell division precocious, cell fate transformation, cell polarity variant, E lineage variant, embryonic lethal, endoderm absent, epithelial development variant, excess intestinal cells, excess pharyngeal cells, excess seam cells, intestinal development variant, larval arrest, larval…	body elongation retracted, cell fate transformation, dorsal intercalation defective, embryonic lethal, hypodermal cell elongation defective, hypodermis disorganized, organism morphology variable, protein expression absent, sterile, ventral closure defective, zygotic lethal	excretory cell, head neuron, P1, P2, P3, P3.p hermaphrodite, P4, P4.p hermaphrodite, P5, P5.p hermaphrodite, P6, P6.p hermaphrodite, P7, P7.p hermaphrodite, P8, P8.p hermaphrodite, P9, P10, P11, P12, seam cell	DA neuron, GABAergic neuron, VA neuron	The apr-1 gene encodes an ortholog of human APC (OMIM:175100, mutated in familial adenomatous polyposis) that is required for germline fertility, the control of homeodomain expression (CEH-13 and LIN-39) during embryogenesis and vulval development, and for the migration and elongation of hypodermal cells during embryo morphogenesis; APR-1 is thought to reside in adherens junctions, while also sti…
WBGene00219964	F52G3.6	F52G3.6	0.520994	0.000183135	1.43494	A0A061AL07	N.A.	ncRNA				N.A.	N.A.	N.A.	N.A.	RNA sequencing and tiling array studies indicate that F52G3.6 is affected by daf-2, elli-1, daf-12, daf-16, sma-2, and sma-4.
WBGene00021412	cyp-29A3	Y38C9B.1	0.517332	0.00196452	1.43131	Q9N525	NP_503130.2	CYtochrome P450 family		heme binding [GO:0020037]; iron ion binding [GO:0005506]; monooxygenase activity [GO:0004497]; oxidoreductase activity, acting on paired donors, with incorporation or reduction of molecular oxygen [GO:0016705]		short defecation cycle	N.A.	N.A.	AFD	cyp-29A3 is an ortholog of human CYP19A1 (cytochrome P450 family 19 subfamily A member 1) and CYP4V2 (cytochrome P450 family 4 subfamily V member 2); cyp-29A3 is predicted to have heme binding activity, iron ion binding activity, and oxidoreductase activity, acting on paired donors, with incorporation or reduction of molecular oxygen, based on protein domain information.
WBGene00000747	col-174	F46C8.2	0.517228	0.00193506	1.4312	Q9GYP3	NP_509276.1	COLlagen		structural constituent of cuticle [GO:0042302]		N.A.	N.A.	N.A.	PLM	col-174 is an ortholog of human MARCO (macrophage receptor with collagenous structure); col-174 is a structural constituent of cuticle, based on protein domain information.
WBGene00044638	F23A7.8	F23A7.8	0.516252	0.00256568	1.43023	Q38G52	NP_001033542.1	Uncharacterized protein				N.A.	N.A.	N.A.	germ line, Psub1	Microarray and RNA sequencing studies indicate that F23A7.8 is affected by Hydrogen sulfide, Rotenone, Manganese chloride, D-glucose, and Cry5B; RNA sequencing studies indicate that F23A7.8 is enriched in the Psub1, germ line, and germline precursor cell.
WBGene00015284	C01B10.10	C01B10.10	0.51231	0.00243913	1.42633	Q17542	NP_501021.3	Uncharacterized protein		carboxylic ester hydrolase activity [GO:0052689]		N.A.	N.A.	N.A.	intestine	RNA sequencing, microarray, and tiling array studies indicate that C01B10.10 is affected by jmjd-3.1, jmjd-1.2, daf-2, hsf-1, rbr-2, mir-34, elli-1, pgl-1, pgl-3, glh-4, glh-1, sma-4, lin-22, dpy-10, octr-1, hcf-1, sir-2.1, nuo-6, eat-2, and daf-16; microarray studies indicate that C01B10.10 is affected by Levamisole, Diazinon, Chlorpyrifos, single-walled carbon nanotubes, Paraquat, and Colistin;…
WBGene00018713	F52G3.5	F52G3.5	0.510474	0.00391886	1.42452	Q9GZH9	NP_510745.2	Uncharacterized protein				N.A.	N.A.	N.A.	ALM, OLL, PLM, PVD	Microarray and RNA sequencing studies indicate that F52G3.5 is affected by bar-1, jmjd-3.1, dop-1, ifg-1, daf-12, daf-16, dpy-21, pgl-1, pgl-3, glh-4, glh-1, cox-5B, sir-2.1, rrf-3, pmk-1, mir-243, crh-1, his-24, hpl-1, and hpl-2; RNA sequencing and microarray studies indicate that F52G3.5 is affected by Multi-walled carbon nanotubes, Zidovudine, Paraquat, Colistin, and adsorbable organic bromine…
WBGene00019394	K04F10.1	K04F10.1	0.50787	0.00211405	1.42195	O44771	NP_491837.2	Uncharacterized protein		RNA binding [GO:0003723]		N.A.	N.A.	N.A.	intestine, neuron, OLL, PVD	The K04F10.1 gene encodes a homolog of SCA1, which when mutated leads to spinocerebellar ataxia 1 (OMIM:164400).
WBGene00013643	Y105C5A.24	Y105C5A.24	0.507479	0.000619216	1.42156	Q9NF64	NP_502888.2	Uncharacterized protein		ATP binding [GO:0005524]; protein kinase activity [GO:0004672]		N.A.	lethal, sterile	N.A.	intestine	Y105C5A.24 is an ortholog of human mos (v-mos Moloney murine sarcoma viral oncogene), MAP3K7 (mitogen-activated protein kinase kinase kinase 7) and ULK2 (unc-51 like autophagy activating kinase 2); Y105C5A.24 is predicted to have ATP binding activity and protein kinase activity, based on protein domain information.
WBGene00012585	lips-15	Y38E10A.7	0.502662	0.00112296	1.41683	Q9NAK4	NP_496690.1	LIPaSe related		hydrolase activity [GO:0016787]		N.A.	N.A.	N.A.	dopaminergic neuron, excretory cell, GABAergic neuron, Psub1, ventral nerve cord	lips-15 is predicted to have hydrolase activity, based on protein domain information.
WBGene00001755	gst-7	F11G11.2	0.499885	0.00209444	1.4141	P91253	NP_494883.1	Probable glutathione S-transferase 7 (EC 2.5.1.18) (GST class-sigma)	innate immune response [GO:0045087]	glutathione transferase activity [GO:0004364]		enzyme activity reduced, organism electrophilic stress hypersensitive	N.A.	germ line, head, hypodermis, intestine	dopaminergic neuron, germ line, intestine, OLL, pharynx, PVD	gst-7 encodes a predicted glutathione S-transferase.
WBGene00010906	M88.3	M88.3	0.495298	0.00240555	1.40961	Q21600	NP_497921.1	Uncharacterized protein				dauer lifespan extended	N.A.	pharynx	CEM, germ line, HOB, IL2 neuron, male, ray neuron type B	M88.3 is expressed in the pharynx.
WBGene00009787	F46F2.3	F46F2.3	0.490129	0.00106959	1.40457	Q20468	NP_510532.1	Uncharacterized protein				embryonic lethal	N.A.	hypodermis	hypodermis, intestine, OLL, PVD	F46F2.3 is expressed in the hypodermis.
WBGene00009385	sas-5	F35B12.5	0.487196	0.000682266	1.40172	Q20010	NP_001256338.1, NP_001256339.1	Spindle assembly abnormal protein 5	centriole replication [GO:0007099]; multicellular organism development [GO:0007275]			cell division variant, cell morphology variant, centriole biogenesis variant, chromosome segregation variant, cytokinesis variant emb, cytoplasmic processing body variant, embryonic lethal, extended life span, germ cell development variant, gonad development variant, male gonad development variant, male somatic gonad development variant, mitotic spindle defective early emb, multiple nuclei early …	embryonic lethal	N.A.	germ line	sas-5 encodes a coiled-coil protein whose activity is required, paternally, maternally, and in a dose-dependent manner, for daughter centriole formation; SAS-5 localizes to both the cytoplasm and to centrioles, and photobleaching experiments reveal rapid SAS-5 cycling between these two cellular components throughout the cell cycle; SAS-5 localization to centrioles depends upon the ZYG-1 kinase an…
WBGene00017937	F30H5.3	F30H5.3	0.480984	0.00131036	1.3957	Q09983	NP_497206.1	Uncharacterized protein		serine-type endopeptidase inhibitor activity [GO:0004867]		dauer constitutive	N.A.	N.A.	intestine, pharynx	F30H5.3 is predicted to have serine-type endopeptidase inhibitor activity, based on protein domain information.
WBGene00000872	cyk-1	F11H8.4	0.48024	1.83021e-05	1.39498	Q7JP75	NP_741211.3, NP_741210.3	CYtoKinesis defect	actin filament organization [GO:0007015]; cell cycle [GO:0007049]; pronuclear migration [GO:0035046]	actin binding [GO:0003779]; Rho GTPase binding [GO:0017048]		adult lethal, body wall cell development variant, body wall muscle actin organization defective, body wall muscle morphology variant, clear, cleavage furrow defective early emb, cleavage furrow termination defective early emb, cortical dynamics defective early emb, cytokinesis variant emb, egg laying variant, embryonic cell organization biogenesis variant, embryonic lethal, everted vulva, explode…	body wall cell development variant, body wall muscle dense body variant, body wall muscle sarcomere morphology variant, lethal, localized movement variant, locomotion reduced, missing gonad arms, no differentiated gametes, protruding vulva, sterile	body wall musculature, excretory cell	AB, excretory cell, GABAergic neuron, germ line, intestine	cyk-1 encodes a Formin Homology protein homologous to Drosophila diaphanous and human DIAPH1; cyk-1 is required for embryonic cytokinesis and Arp2/3-independent assembly of cortical microfilaments; CYK-1 physically interacts with the PFN-1 profilin; CYK-1 is enriched within cleavage furrows during cell division.
WBGene00019932	R07C12.2	R07C12.2	0.477552	0.00308131	1.39238	O44525	N.A.	psuedogene				N.A.	N.A.	N.A.	intestine, OLL, PVD	Microarray studies indicate that R07C12.2 is affected by Colistin; tiling array and RNA sequencing studies indicate that R07C12.2 is enriched in the intestine and in the PVD and OLL neurons.
WBGene00002129	inx-7	K02B2.4	0.476392	0.000839401	1.39126	Q21123	NP_001293767.1, NP_500894.1	Innexin	ion transport [GO:0006811]			N.A.	reduced brood size	ADEL, ADER, AIYL, AIYR, ALML, ALMR, ALNL, ALNR, AVAL, AVAR, AVKL, AVKR, AVM, BDUL, BDUR, CANL, CANR, DA neuron, DVA, DVB, DVC, FLPL, FLPR, g1AL, g1AR, g1P, g2L, g2R, HSNL, HSNR, LUAL, LUAR, MCL, MCR, pharyngeal epithelial cell, PLML, PLMR, PLNL, PLNR, pm1, pm2, pm3, pm4, pm5, pm6, pm7, pm8, PVCL, PVCR, PVM, PVPL, PVPR, PVQL, PVQR, PVT, PVWL, PVWR, rectal gland cell, RID, RIS, SDQL, SDQR, URBL, UR…	ASER, germ line, neuron, OLL, PVD	Tiling array, microarray, and RNA sequencing studies indicate that inx-7 is affected by daf-12, clk-1, daf-16, jmjd-3.1, elli-1, sma-2, sma-4, sir-2.1, dpy-9, dpy-10, fbf-1, gld-2, lin-54, tdp-1, and tbx-2; RNA sequencing and microarray studies indicate that inx-7 is affected by Zidovudine, Hydrolyzable Tannins, Humic substances, Paraquat, and Sirolimus; microarray and RNA sequencing studies indi…
WBGene00002998	lin-9	ZK637.7	0.474725	0.000926848	1.38965	P30630	NP_001023016.1, NP_001023015.1	Protein lin-9 (Abnormal cell lineage protein 9)	cell cycle [GO:0007049]; embryo development ending in birth or egg hatching [GO:0009792]; gonad development [GO:0008406]; male gonad development [GO:0008584]; negative regulation of vulval development [GO:0040027]; nematode male tail tip morphogenesis [GO:0045138]; regulation of transcription, DNA-templated [GO:0006355]; reproduction [GO:0000003]; transcription, DNA-templated [GO:0006351]			amphid phasmid morphology variant, early larval arrest, ectopic expression transgene, exploded through vulva, L1 arrest, larval arrest, locomotion variant, multivulva, nuclear number variant, organism morphology variant, protruding vulva, slow growth, sterile progeny	embryonic arrest, endomitotic oocytes, failure to hatch, larval arrest, male gonad development variant, rays missing, reduced brood size, RNAi enhanced, somatic gonad development variant, somatic gonad morphology variant, spicule morphology variant, sterile	N.A.	germ line, intestine, OLL, PVD	lin-9 encodes two novel proteins that are conserved amongst C. elegans, Drosophila, plants, and vertebrates; lin-9 activity is required redundantly with activity of the synMuv A genes, such as lin-8, for negative regulation of the RTK/Ras-mediated signal transduction pathway that controls vulval development; in addition, lin-9 activity is required non-redundantly for hermaphrodite gonadal sheath …
WBGene00011250	R11H6.2	R11H6.2	0.473132	1.86631e-05	1.38812	O45719	NP_506611.1	Uncharacterized protein		L-serine transmembrane transporter activity [GO:0015194]		N.A.	N.A.	N.A.	DA neuron, dopaminergic neuron, germ line, I5 neuron, neuron, PLM, retrovesicular ganglion, SAB, VA neuron	R11H6.2 is an ortholog of human SERINC2 (serine incorporator 2), SERINC3 (serine incorporator 3) and SERINC1 (serine incorporator 1); RNA sequencing and microarray studies indicate that R11H6.2 is affected by tatn-1, emr-1, lem-2, gld-2, fog-3, hsf-1, pgl-1, pgl-3, glh-4, glh-1, emb-4, sma-2, sma-4, sir-2.1, dpy-10, fbf-1, gld-1, and hlh-25; RNA sequencing and microarray studies indicate that R11…
WBGene00002250	lap-2	W07G4.4	0.472652	2.78803e-05	1.38766	Q27245	NP_506260.1	Putative aminopeptidase W07G4.4 (EC 3.4.11.-)		aminopeptidase activity [GO:0004177]; manganese ion binding [GO:0030145]; metalloexopeptidase activity [GO:0008235]		protein aggregation variant	N.A.	N.A.	intestine, OLL, PVD	The lap-2 gene encodes a homolog of the zinc metalloprotease leucine aminopeptidase LAP.
WBGene00022287	Y75B7AR.1	Y75B7AR.1	0.470765	0.00251625	1.38584	Q9N2X6	NP_503408.1	Uncharacterized protein				N.A.	N.A.	N.A.	body wall musculature, dorsal nerve cord, lateral nerve cord, muscle cell, nerve ring, NSM, OLL, pharynx, PVD, somatic neuron, tail neuron, ventral nerve cord, vulval muscle	RNA sequencing and microarray studies indicate that Y75B7AR.1 is affected by 1-methylnicotinamide, Nicotinic acid, Mercuric Chloride, Rotenone, Manganese chloride, D-glucose, Zidovudine, Quercetin, Colistin, Dafa#1, adsorbable organic bromine compounds, Sirolimus, and Triclosan; chronogram analysis, microarray, and tiling array studies indicate that Y75B7AR.1 is enriched in the ventral nerve cord…
WBGene00007018	mdt-18	C55B7.9	0.465235	0.00337227	1.38054	Q966M5	NP_001309518.1, NP_491869.1	Mediator of RNA polymerase II transcription subunit 18 (Mediator complex subunit 18)	transcription, DNA-templated [GO:0006351]	RNA polymerase II transcription cofactor activity [GO:0001104]		axon fasciculation variant, axon guidance variant, axon midline crossing variant, cord commissures fail to reach target, dumpy, embryonic lethal, exploded through vulva, larval arrest, lethal, locomotion variant, slow growth, ventral cord patterning variant	gametogenesis variant, gonad morphology variant, lethal, maternal effect lethal emb, sterile	N.A.	AFD, germ line, intestine, PLM	mdt-18 is an ortholog of human MED18 (mediator complex subunit 18); microarray and RNA sequencing studies indicate that mdt-18 is affected by cgh-1, cyc-1, nhr-114, tatn-1, clk-1, daf-16, jmjd-3.1, mir-34, pgl-1, pgl-3, glh-4, glh-1, emb-4, sma-2, sma-4, lin-22, sir-2.1, ain-1, mir-243, and tdp-1; microarray studies indicate that mdt-18 is affected by Cry5B, Humic substances, Paraquat, and Allant…
WBGene00001066	dpy-4	Y41E3.2	0.464427	0.00113027	1.37977	O62432	NP_502808.1	DumPY: shorter than wild-type	cuticle development involved in collagen and cuticulin-based cuticle molting cycle [GO:0042338]	structural constituent of cuticle [GO:0042302]		dumpy, larval lethal, locomotion variant, no induction of antimicrobial peptide expression after infection, reduced brood size	annulae morphology variant, dumpy, pattern of transgene expression variant	N.A.	DA neuron, intestine, VA neuron	dpy-4 encodes a cuticle collagen; dpy-4 activity is required for normal body morphology, locomotion, and larval development.
WBGene00014013	ZK632.4	ZK632.4	0.458962	0.000179147	1.37455	P34650	NP_499174.3	Probable mannose-6-phosphate isomerase (EC 5.3.1.8) (Phosphohexomutase) (Phosphomannose isomerase) (PMI)	carbohydrate metabolic process [GO:0005975]; cell wall mannoprotein biosynthetic process [GO:0000032]; GDP-mannose biosynthetic process [GO:0009298]; protein glycosylation [GO:0006486]	mannose-6-phosphate isomerase activity [GO:0004476]; zinc ion binding [GO:0008270]		N.A.	N.A.	amphid neuron, head neuron, hypodermis, intestine, nervous system	cephalic sheath cell, dopaminergic neuron, germ line, germline precursor cell, hypodermis, OLL, PLM, PVD	ZK632.4 is orthologous to the human gene PHOSPHOMANNOSE ISOMERASE (MPI; OMIM:154550), which when mutated leads to disease.
WBGene00016971	toe-2	C56E6.3	0.457921	0.00125783	1.37356	H2KZH5	NP_001022043.1, NP_001022042.1	Target Of ERK kinase MPK-1	intracellular signal transduction [GO:0035556]; positive regulation of apoptotic process [GO:0043065]; regulation of asymmetric cell division [GO:0009786]; signal transduction [GO:0007165]	kinase activity [GO:0016301]		N.A.	N.A.	AQR, PQR, QL, QL.a, QL.aa, QL.p, QL.pa, QL.pp, QR, QR.a, QR.aa, QR.p, QR.pa, QR.pp	GABAergic neuron, germ line, hypodermis	toe-2 is an ortholog of human DEPDC7 (DEP domain containing 7) and DEPDC4 (DEP domain containing 4); toe-2 is involved in positive regulation of apoptotic process and regulation of asymmetric cell division; toe-2 is expressed in the QR, QL, certain sensory neurons, QL.a, QL.aa, QL.p, QL.pa, QL.pp, QR.a, QR.aa, QR.p, QR.pa, and the QR.pp.
WBGene00012184	W01F3.1	W01F3.1	0.454697	0.000652596	1.3705	O45879	NP_507990.1, NP_507991.1	MeNoRin (Dendritic branching protein)	dendrite morphogenesis [GO:0048813]; dendrite self-avoidance [GO:0070593]; positive regulation of dendrite morphogenesis [GO:0050775]; regulation of dendrite extension [GO:1903859]; regulation of dendrite morphogenesis [GO:0048814]			N.A.	N.A.	excretory cell, head neuron, hypodermis, intestine, nervous system, pharynx, reproductive system, tail neuron, vulva	neuron, PLM	mnr-1 is an ortholog of human FAM151A (family with sequence similarity 151 member A) and FAM151B (family with sequence similarity 151 member B); mnr-1 is involved in dendrite morphogenesis; mnr-1 is expressed in the pharynx, hypodermis, nervous system, reproductive system, intestine, and the excretory cell; mnr-1 is localized to the extracellular space and the plasma membrane.
WBGene00010567	K04G2.9	K04G2.9	0.453617	0.000104355	1.36947	Q21228	NP_492219.1	Uncharacterized protein	membrane raft polarization [GO:0001766]; protein localization [GO:0008104]			multivulva	N.A.	N.A.	germ line, germline precursor cell, hypodermis, intestine, PLM	K04G2.9 is an ortholog of human PLLP (plasmolipin) and mal (mal, T-cell differentiation protein) and members of the CMTM (CKLF like MARVEL transmembrane domain containing) family including CMTM8 and MARVEL domain containing family including MARVELD1; microarray, proteomic, and RNA sequencing studies indicate that K04G2.9 is affected by clk-1, cyc-1, gld-1, let-7, daf-2, mir-60, pgl-1, pgl-3, glh-…
WBGene00022425	plst-1	Y104H12BR.1	0.445036	0.00034683	1.36135	U4PMA7	NP_001294439.1, NP_001294438.1	PLaSTin (Actin bundling protein) homolog		actin binding [GO:0003779]		cleavage furrow initiation defective early emb, embryonic lethal, germ cell morphology variant, reduced brood size	N.A.	hypodermis, intestine, pharynx	AFD, germ line, OLL, PVD	plst-1 is an ortholog of human PLS1 (plastin 1), PLS3 (plastin 3) and LCP1 (lymphocyte cytosolic protein 1 (L-plastin)); plst-1 is involved in embryo development; This gene appears to be missing the N-terminus compared to all orthologous genes, suggesting that the N2 reference is missing this sequence due to an assembly issue.
WBGene00000939	dcr-1	K12H4.8	0.441949	1.20613e-05	1.35844	P34529	NP_498761.2	Endoribonuclease dcr-1 (EC 3.1.26.-) [Cleaved into: Death-promoting deoxyribonuclease (tDCR-1) (EC 3.1.21.-)]	apoptotic DNA fragmentation [GO:0006309]; DNA catabolic process, endonucleolytic [GO:0000737]; dsRNA fragmentation [GO:0031050]; gonad morphogenesis [GO:0035262]; nematode larval development [GO:0002119]; olfactory learning [GO:0008355]; positive regulation of primary miRNA processing [GO:2000636]; pre-miRNA processing [GO:0031054]; production of siRNA involved in RNA interference [GO:0030422]; r…	ATP binding [GO:0005524]; deoxyribonuclease I activity [GO:0004530]; DNA binding [GO:0003677]; helicase activity [GO:0004386]; metal ion binding [GO:0046872]; ribonuclease III activity [GO:0004525]; RNA binding [GO:0003723]		acquired thermotolerance variant, alae absent, alae morphology variant, alae variant, apoptosis variant, breaks in alae, development variant, developmental timing variant, DNA metabolism variant, egg laying defective, egg laying variant, excess intestinal cells, excess seam cells, exploded through vulva, gene expression variant, germline transgene silencing variant, high incidence male progeny, l…	acquired thermotolerance variant, dendritic termini number reduced, endomitotic oocytes, excess seam cells, germ cell development variant, high incidence male progeny, male sperm fertilization defect, miRNA expression variant, mRNA levels increased, organism oxidative stress response variant, reduced brood size, retarded seam cell fusion, RNAi enhanced, shortened life span, siRNA expression varia…	germ line, intestine, neuron, PVDL, PVDR, somatic cell	germ line	dcr-1 encodes a bidentate ribonuclease that is homologous to E. coli RNAse III; DCR-1 is required both for RNA interference and for synthesis of small developmental RNAs; DCR-1 functions to process pre-miRNAs into their mature, 22-nt form; DCR-1 interacts in vivo with RDE-4, a double-stranded RNA (dsRNA) binding protein required for RNAi that interacts with trigger dsRNAs and may function to deli…
WBGene00022259	Y73C8B.2	Y73C8B.2	0.441745	0.000584257	1.35825	Q9N4E1	NP_503879.1	Uncharacterized protein		hydrolase activity [GO:0016787]		N.A.	N.A.	N.A.	OLL, PLM, PVD	Microarray, tiling array, and RNA sequencing studies indicate that Y73C8B.2 is affected by sma-2, daf-12, hpl-2, blmp-1, mes-2, pgl-1, pgl-3, glh-4, glh-1, emb-4, lin-54, tdp-1, and eat-2; microarray studies indicate that Y73C8B.2 is affected by Atrazine, Cry5B, Paraquat, and Dafa#1; microarray and RNA sequencing studies indicate that Y73C8B.2 is enriched in the PVD, OLL, and PLM neurons.
WBGene00009626	F42A8.1	F42A8.1	0.439067	0.0013618	1.35573	Q09321	NP_495991.1	Uncharacterized protein F42A8.1				cytoplasmic processing body variant, dumpy, embryonic lethal, larval arrest, molt defect, no induction of antimicrobial peptide expression after infection, organism morphology variant, patchy coloration, slow growth, transgene subcellular localization variant	lethal, sterile	head, intestine, vulva	germ line, gon_male_dtc anterior, gon_male_dtc posterior, hypodermis, Z1, Z1.p, Z4, Z4.a	F42A8.1 is expressed in the head, intestine, and the vulva.
WBGene00017583	F19B10.1	F19B10.1	0.438081	0.00366912	1.3548	O02076	NP_494614.1	Uncharacterized protein				N.A.	N.A.	N.A.	AFD, AVE, DA neuron, germ line, gon_male_dtc anterior, gon_male_dtc posterior, I5 neuron, muscle cell, neuron, OLL, PVD, retrovesicular ganglion, SAB, VA neuron, Z1.p, Z4.a	Microarray and RNA sequencing studies indicate that F19B10.1 is affected by Hydrogen sulfide, Rotenone, Paraquat, Sirolimus, Cholesterol, and Octopamine; microarray, tiling array, and RNA sequencing studies indicate that F19B10.1 is enriched in the gon_male_dtc posterior, gon_male_dtc anterior, Z1.p, Z4.a, germ line, and muscle cell and in neurons including PVD, OLL, AVE, AFD, I5, DA, SAB, and re…
WBGene00015096	B0261.8	B0261.8	0.437047	0.00176888	1.35383	Q7Z116	NP_001020968.1	Uncharacterized protein				N.A.	N.A.	N.A.	N.A.	RNA sequencing and microarray studies indicate that B0261.8 is affected by emr-1, lem-2, clk-1, wdr-5.1, cox-5B, jmjd-1.2, daf-2, mir-60, mir-34, pgl-1, pgl-3, glh-4, and glh-1; RNA sequencing studies indicate that B0261.8 is affected by Mianserin.
WBGene00018488	acs-1	F46E10.1	0.434372	0.00189153	1.35132	Q9UAV8	NP_001023938.1, NP_001023939.1, NP_001023937.1	Fatty Acid CoA Synthetase family	metabolic process [GO:0008152]	catalytic activity [GO:0003824]		accumulated germline cell corpses, antibody staining reduced, apoptosis variant, avoids bacterial lawn, Bacillus thuringiensis toxin hypersensitive, cell membrane morphology variant, cell membrane organization biogenesis variant, chromosome condensation variant, cleavage furrow defective early emb, early larval arrest, egg laying defective, embryonic arrest, embryonic development variant, embryon…	cell membrane morphology variant, cell membrane organization biogenesis variant, cleavage furrow defective early emb, embryonic lethal, larval lethal, lethal, lipid composition variant, membrane trafficking variant, sterile	intestine, neuron, somatic gonad	germline precursor cell, hypodermis, intestine, OLL, PVD	acs-1 is an ortholog of human ACSF2 (acyl-CoA synthetase family member 2); acs-1 is predicted to have catalytic activity, based on protein domain information; acs-1 is expressed in the nervous system, intestine, and the somatic gonad.
WBGene00007685	C18E9.5	C18E9.5	0.431708	0.0022311	1.34883	Q18091	NP_495911.3	Uncharacterized protein				fat content reduced	N.A.	N.A.	intestine	RNA sequencing, proteomic, and microarray studies indicate that C18E9.5 is affected by lin-39, gld-1, let-7, emr-1, lem-2, wrn-1, htz-1, daf-16, daf-2, chd-3, pgl-1, pgl-3, glh-4, glh-1, sir-2.1, dpy-10, and ash-2; RNA sequencing and microarray studies indicate that C18E9.5 is affected by Rotenone, Cry5B, and Sirolimus; tiling array, RNA sequencing, and proteomic studies indicate that C18E9.5 is …
WBGene00001832	hcp-4	T03F1.9	0.428314	0.00109186	1.34566	G5EDA3	NP_491244.1	CENP-C-like protein HCP-4 (HoloCentric chromosome binding Protein)	attachment of spindle microtubules to kinetochore [GO:0008608]; establishment of protein localization to chromosome [GO:0070199]; kinetochore assembly [GO:0051382]; mitotic cell cycle [GO:0000278]; mitotic metaphase plate congression [GO:0007080]; mitotic sister chromatid segregation [GO:0000070]; negative regulation of mitotic centrosome separation [GO:0046603]; nuclear chromosome segregation [G…			chromosome segregation variant, embryonic lethal, kinetochore organization variant, maternal sterile, mitotic spindle defective early emb, multiple nuclei early emb, pattern of transgene expression variant, protein subcellular localization variant, receptor mediated endocytosis defective, reduced brood size, sister chromatid segregation defective early emb, transgene subcellular localization vari…	early larval lethal, lethal	N.A.	germ line, hypodermis, pharyngeal muscle cell	The hcp-4 gene encodes a centromere protein (CENP)-C homolog, holocentric protein (HCP)-4.
WBGene00015507	C06A6.2	C06A6.2	0.426779	0.000650358	1.34423	H2KYH8	NP_001294140.1, NP_001294197.1, NP_001294141.1, NP_741450.2, NP_001294142.1, NP_741449.2	Uncharacterized protein	regulation of transcription, DNA-templated [GO:0006355]; transcription, DNA-templated [GO:0006351]	DNA binding [GO:0003677]		embryonic lethal, fat content reduced	N.A.	N.A.	intestine, OLL, PVD	Tiling array, RNA sequencing, and microarray studies indicate that C06A6.2 is affected by daf-12, jmjd-3.1, hsf-1, mes-2, mes-6, mir-34, dpy-21, pgl-1, pgl-3, glh-4, glh-1, morc-1, vgln-1, lin-22, fbf-1, and crh-1; microarray studies indicate that C06A6.2 is affected by Atrazine, Quercetin, Humic substances, and Sirolimus; microarray studies indicate that C06A6.2 is enriched in the intestine and …
WBGene00008260	C52G5.2	C52G5.2	0.426277	0.000666236	1.34376	Q18793	NP_510139.1	Uncharacterized protein				N.A.	N.A.	N.A.	germline precursor cell, hypodermis, PLM, Z1, Z4	C52G5.2 is an ortholog of human THAP4 (THAP domain containing 4); microarray and RNA sequencing studies indicate that C52G5.2 is affected by Aldicarb, D-glucopyranose, D-glucose, Zidovudine, Diazinon, Chlorpyrifos, Quercetin, Humic substances, Colistin, and Sirolimus; tiling array and RNA sequencing studies indicate that C52G5.2 is enriched in the germline precursor cell, hypodermis, Z4, and Z1 a…
WBGene00002027	hsr-9	T05F1.6	0.426258	0.000117047	1.34374	Q7JKP6	NP_001021610.1	Protein hsr-9 (Heat shock related protein 9) (Tumor suppressor p53-binding protein 1 homolog) (53BP1)	DNA damage checkpoint [GO:0000077]; DNA repair [GO:0006281]; positive regulation of transcription by RNA polymerase II [GO:0045944]	histone binding [GO:0042393]		exploded through vulva, fat content reduced, larval arrest, lethal, protruding vulva, reduced brood size, sterile, sterile progeny	N.A.	germ cell	AVA, germ line, neuron, OLL, PVD	hsr-9 encodes a protein containing a BRCT (BRCA 1 C terminus) domain that is found in proteins that regulate the cell cycle checkpoint in response to DNA damage; HSR-9 activity is required for a normal response to DNA damage caused by gamma-irradiation; loss of HSR-9 function via RNA-mediated interference after gamma-irradiation results in defects in mitotic cell cycle arrest, reduction of apopto…
WBGene00006503	snx-3	W06D4.5	0.422751	0.00118943	1.34048	Q9XW41	NP_492437.1	Sorting NeXin	endocytosis [GO:0006897]; vesicle organization [GO:0016050]	phosphatidylinositol binding [GO:0035091]		seam cell morphology variant	egg laying variant	Cell, coelomocyte, pharynx, rectal epithelial cell	cephalic sheath cell, coelomocyte, germ line, intestine, NSM, PLM	snx-3 is an ortholog of human Snx3 (sorting nexin 3) and SNX12 (sorting nexin 12); snx-3 is predicted to have phosphatidylinositol binding activity, based on protein domain information; snx-3 is expressed in several tissues including the pharynx; snx-3 is localized to the endosome.
WBGene00021365	smgl-2	Y37E11AM.1	0.419528	0.000283755	1.33749	U4PRA5	NP_001294374.1, NP_001294375.1	Uncharacterized protein		ATP binding [GO:0005524]; helicase activity [GO:0004386]		cell secretion variant, cytoplasmic processing body variant, dumpy, early embryonic lethal, embryonic lethal, gene expression variant, larval arrest, larval lethal, locomotion variant, mRNA surveillance defective, nonsense mRNA accumulation, pattern of transgene expression variant, receptor mediated endocytosis defective, sterile, transgene expression increased, transgene subcellular localization…	N.A.	N.A.	germ line, OLL, PVD	smgl-2 encodes a DEAH helicase orthologous to the Drosophila CG12211 protein.
WBGene00020855	hpo-36	T27C4.2	0.416437	0.00145079	1.33463	A0A131MCT7	NP_001309615.1, NP_001309614.1	Uncharacterized protein				Bacillus thuringiensis toxin hypersensitive, pore forming toxin hypersensitive	N.A.	N.A.	N.A.	Microarray and RNA sequencing studies indicate that hpo-36 is affected by cyc-1, age-1, set-2, cox-5B, jmjd-3.1, jmjd-1.2, let-418, chd-3, dpy-21, pgl-1, pgl-3, glh-4, glh-1, sid-3, lin-22, smg-2, sir-2.1, ain-1, mir-243, and eat-2; RNA sequencing and microarray studies indicate that hpo-36 is affected by Methylmercury hydroxide, Manganese chloride, Bisphenol A, Atrazine, Chlorpyrifos, Diazinon, …
WBGene00009469	F36D3.1	F36D3.1	0.412687	0.00350043	1.33116	O45458	NP_507178.1	Uncharacterized protein				embryonic lethal, slow growth	N.A.	gonad	germ line, gon_male_dtc anterior, gon_male_dtc posterior, neuron, Z1.p, Z4.a	F36D3.1 is expressed in the gonad.
WBGene00015791	C15C7.5	C15C7.5	0.409362	0.000249856	1.3281	Q18012	NP_508542.1	Uncharacterized protein				clear, fat content reduced, locomotion variant, slow growth, transgene expression increased	N.A.	N.A.	ASER, intestine, PLM	C15C7.5 is expressed in the pharyngeal muscle cell, intestine, and the head neurons.
WBGene00006683	twk-31	Y47D3B.5	0.40725	0.00141009	1.32616	Q6EUT8	NP_001022884.1, NP_001022883.1	TWiK family of potassium channels	potassium ion transmembrane transport [GO:0071805]; stabilization of membrane potential [GO:0030322]	potassium ion leak channel activity [GO:0022841]		embryonic lethal, locomotion variant, organism morphology variant	N.A.	N.A.	AFD, body wall muscle cell, GABAergic neuron, muscle cell	twk-31 encodes a member of the two pore-domain potassium channel family; loss of twk-31 activity via RNAi in an rrf-3-sensitized strain results in embryonic lethality, uncoordinated locomotion, and abnormal body morphology.
WBGene00017738	F23C8.9	F23C8.9	0.407244	0.0037387	1.32615	Q9TXI0	NP_490977.1	Protein TIPIN homolog (CSM3 homolog)	cell cycle phase transition [GO:0044770]; cell division [GO:0051301]; DNA replication checkpoint [GO:0000076]; intra-S DNA damage checkpoint [GO:0031573]; positive regulation of cell proliferation [GO:0008284]; regulation of nuclear cell cycle DNA replication [GO:0033262]; replication fork arrest [GO:0043111]; replication fork protection [GO:0048478]	DNA binding [GO:0003677]		N.A.	N.A.	N.A.	germ line, gon_male_dtc anterior, gon_male_dtc posterior, intestine, Z1.p, Z4.a	tipn-1 is an ortholog of human TIPIN (TIMELESS interacting protein); RNA sequencing and microarray studies indicate that tipn-1 is affected by Rotenone, Manganese chloride, Nanoparticle, Zidovudine, Hydrolyzable Tannins, Humic substances, Paraquat, and Sirolimus; RNA sequencing and microarray studies indicate that tipn-1 is enriched in the germ line, gon_male_dtc posterior, gon_male_dtc anterior,…
WBGene00007979	imp-1	C36B1.12	0.404155	0.000241794	1.32331	Q564X0	NP_001021024.1, NP_001021023.1, NP_001021025.1	IntraMembrane Protease (IMPAS) family		aspartic-type endopeptidase activity [GO:0004190]		N.A.	N.A.	head neuron, intestine, nervous system, neuron	germ line, NSM	imp-1 encodes an intramembrane aspartic protease orthologous to the mammalian signal peptide peptidase-like family of proteins; by homology, IMP-1 is predicted to function in the cleavage of type II transmembrane proteins within their transmembrane domain; an imp-1::gfp reporter fusion is expressed primarily in head neurons, with some expression also seen in the posterior intestine.
WBGene00019971	ergo-1	R09A1.1	0.403721	0.000255627	1.32292	O61931	NP_503362.2, NP_001300166.1, NP_001300165.1, NP_001300164.1	Piwi-like protein ergo-1 (Endogenous RNA interference deficient argonaute protein 1)	production of siRNA involved in RNA interference [GO:0030422]; regulation of translation [GO:0006417]; RNA interference [GO:0016246]	DEAD/H-box RNA helicase binding [GO:0017151]; nucleic acid binding [GO:0003676]		N.A.	mRNA levels increased, RNAi enhanced, siRNA expression variant	N.A.	germ line	ergo-1 encodes an Argonaute protein; ERGO-1 is required for somatic gene regulation via the production or stabilization of endogenous (endo)-siRNAs, specifically the initial class of endo-siRNAs which are 26-nt, 5'-monophosphorylated, 5'-G-enriched antisense siRNAs; ERGO-1 activity is also required for the subcellular redistribution of the NRDE-3 Argonaute protein which, upon binding secondary si…
WBGene00000239	bas-1	C05D2.4	0.397226	0.0022552	1.31697	O45137	NP_001021151.1, NP_001021150.1	Biogenic Amine Synthesis related	cellular amino acid metabolic process [GO:0006520]; dopamine biosynthetic process [GO:0042416]; locomotion involved in locomotory behavior [GO:0031987]; oviposition [GO:0018991]; sensory perception of chemical stimulus [GO:0007606]; serotonin biosynthetic process [GO:0042427]; turning behavior involved in mating [GO:0034607]	carboxy-lyase activity [GO:0016831]; pyridoxal phosphate binding [GO:0030170]		N.A.	amplitude of sinusoidal movement increased, antibody staining variant, aqueous adaptation defective, backward locomotion variant, backward point velocity increased, body posture amplitude increased, body posture wavelength decreased, coiling frequency increased, dopamine deficient, fat content increased, forward locomotion increased, forward point velocity increased, frequency of body bend varian…	ADEL, ADER, ADFL, ADFR, AIML, AIMR, CEPDL, CEPDR, CEPVL, CEPVR, CP5, CP6, dopaminergic neuron, HSNL, HSNR, NSML, NSMR, PDEL, PDER, R1AL, R1AR, R1BL, R1BR, R2AL, R2AR, R2BL, R2BR, R3AL, R3AR, R3BL, R3BR, R4AL, R4AR, R4BL, R4BR, R5AL, R5AR, R5BL, R5BR, R6AL, R6AR, R6BL, R6BR, R7AL, R7AR, R7BL, R7BR, R8AL, R8AR, R8BL, R8BR, R9AL, R9AR, R9BL, R9BR, RIH, serotonergic neuron	BAG, dopaminergic neuron, intestine, neuron, NSM	bas-1 encodes a serotonin- and dopamine-synthetic aromatic amino acid decarboxylase (AAADC) that is required for the synthesis of serotonin from 5-hydroxytryptophan in vivo; mutations of bas-1 impair the turning step in male mating, the migration of AVM, SDQR, ALM, and BDU neurons during development.
WBGene00020891	T28C12.4	T28C12.4	0.39466	0.0033054	1.31463	Q4LDP0	NP_504613.1, NP_504614.1	Carboxylic ester hydrolase (EC 3.1.1.-)		carboxylic ester hydrolase activity [GO:0052689]		N.A.	N.A.	hypodermis, seam cell	dopaminergic neuron, germline precursor cell, hypodermis, intestine	T28C12.4 encodes a protein with visible similarity to human neuroligin 4 (mutated in autism), but also belongs to a large family of carboxylesterases that happen to include NLG-1; normally, T28C12.4 is expressed in hypodermal cells; transcription of T28C12.4 is immediately induced by exposure to ethanol, and with glr-2 is one of a few genes that may be specifically responsive to ethanol (as oppos…
WBGene00002024	hsp-43	C14F11.5	0.389023	0.00327049	1.30951	B0M0L8	NP_001123107.2, NP_509045.1	Heat Shock Protein				N.A.	N.A.	body wall musculature, copulatory spicule, hypodermis, muscle cell, pharyngeal-intestinal valve, R1AL, R1AR, R1BL, R1BR, R1stL, R1stR, R2AL, R2AR, R2BL, R2BR, R2stL, R2stR, R3AL, R3AR, R3BL, R3BR, R3stL, R3stR, R4AL, R4AR, R4BL, R4BR, R4stL, R4stR, R5AL, R5AR, R5BL, R5BR, R5stL, R5stR, R6AL, R6AR, R6BL, R6BR, R6stL, R6stR, R7AL, R7AR, R7BL, R7BR, R7stL, R7stR, R8AL, R8AR, R8BL, R8BR, R8stL, R8stR…	excretory cell, GABAergic neuron, germ line, hypodermis	hsp-43 encodes a member of the hsp20 family.
WBGene00003030	lin-45	Y73B6A.5	0.387161	0.00398208	1.30782	Q07292	NP_001293844.1, NP_001293842.1, NP_741430.3, NP_001293843.1, NP_741431.2, NP_001293841.1	Raf homolog serine/threonine-protein kinase (EC 2.7.11.1) (Abnormal cell lineage protein 45)	cell fate specification [GO:0001708]; defense response to Gram-positive bacterium [GO:0050830]; MAPK cascade [GO:0000165]; meiotic cell cycle [GO:0051321]; negative regulation of apoptotic process [GO:0043066]; negative regulation of signal transduction [GO:0009968]; nematode larval development [GO:0002119]; oogenesis [GO:0048477]; positive regulation of ERK1 and ERK2 cascade [GO:0070374]; Ras pr…	ATP binding [GO:0005524]; MAP kinase kinase kinase activity [GO:0004709]; metal ion binding [GO:0046872]; mitogen-activated protein kinase kinase binding [GO:0031434]; Ras GTPase binding [GO:0017016]		cell membrane organization biogenesis variant, diplotene progression during oogenesis variant, embryo osmotic integrity defective early emb, embryonic lethal, feminization of germline, germ cell compartment anucleate, germ cell compartment expansion variant, germ cell compartment multinucleate, germ cell compartment size variant, germ cell partition morphology variant, germline nuclear positionin…	AWA odorant chemotaxis defective, AWC odorant chemotaxis defective, bacterially unswollen, constipated, egg laying variant, genotoxic induced apoptosis variant, germ cell arrest, germ nuclei rachis, lethal, metabolic pathway variant, nose touch defective, pachytene region organization variant, pathogen susceptibility increased, protein degradation variant, rod like larval lethal, vulval cell indu…	head neuron, vulval precursor cell	ASER, germ line, intestine, neuron	The lin-45 gene encodes an ortholog of the vertebrate protein RAF which is required for larval viability, fertility and the induction of vulval cell fates.
WBGene00001790	gst-42	D1053.1	0.386805	0.00230728	1.30749	Q18938	NP_509962.1	Probable maleylacetoacetate isomerase (MAAI) (EC 5.2.1.2) (Glutathione S-transferase gst-42)	L-phenylalanine catabolic process [GO:0006559]; tyrosine catabolic process [GO:0006572]	identical protein binding [GO:0042802]; maleylacetoacetate isomerase activity [GO:0016034]		N.A.	N.A.	intestine	hypodermis, intestine, OLL, PVD	gst-42 is orthologous to the human gene GLUTATHIONE TRANSFERASE ZETA-1 (also known as MALEYLACETOACETATE ISOMERASE; GSTZ1; OMIM:603758), which when mutated is thought to lead to a variety of type I tyrosinemia.
WBGene00006876	vab-10	ZK1151.1	0.384919	0.000136393	1.30579	A0A1N7SYP3	NP_001040721.1, NP_001021855.1, NP_001021856.1, NP_001021854.1, NP_001122565.1, NP_001021857.1, NP_001335520.1, NP_001335521.1, NP_001335519.1, NP_001021853.1, NP_001021859.1, NP_001335522.1, NP_001335523.1, NP_001335524.1, NP_001021858.1	VAB-10B protein		actin filament binding [GO:0051015]; microtubule binding [GO:0008017]		body wall muscle myosin organization defective, body wall muscle sarcomere morphology variant, cell secretion variant, clear, dead eggs laid, distal tip cell migration variant, embryonic lethal, embryonic lethal late emb, endosome biogenesis variant, exploded through vulva, germ cell morphology variant, gonad development variant, growth rate variant, larval arrest, larval lethal, late embryonic a…	antibody staining reduced, antimicrobial gene expression variant, distal tip cell migration variant, early larval lethal, embryonic lethal, gonad arm morphology variant, gonad development variant, growth variant, head bent, head morphology variant, male sterile, male tail development variant, microtubule organization biogenesis variant, muscle attachment variant, nuclear positioning variant, orga…	Anchor cell, body wall musculature, DTC, gonad, hypodermis, intestinal lumen, nerve ring, pharyngeal lumen, pharynx	hypodermis	vab-10 encodes, by alternative splicing, two spectraplakins (VAB-10A and VAB-10B) that are jointly required for mechanical resilience of the epidermis under strain by the contraction of actin microfilaments mechanically linked to fibrous organelles (FOs); VAB-10A/B are, accordingly, required for elongation during embryonic morphogenesis; VAB-10A has C-terminal plectin repeats while VAB-10B has sp…
WBGene00013359	Y60A3A.8	Y60A3A.8	0.382797	0.00378049	1.30387	Q9U1Z5	NP_507862.2	Uncharacterized protein				N.A.	N.A.	N.A.	germ line	Microarray, RNA sequencing, and tiling array studies indicate that Y60A3A.8 is affected by cyc-1, lin-15B, lin-35, hsf-1, mes-2, let-418, chd-3, mir-34, vit-2, fbf-1, daf-2, hcf-1, sir-2.1, spg-7, tbx-2, nuo-6, and nipi-3; microarray and RNA sequencing studies indicate that Y60A3A.8 is affected by Methylmercuric chloride, Rotenone, Zidovudine, Diazinon, Cry5B, Chlorpyrifos, Humic substances, and …
WBGene00003002	lin-13	C03B8.4	0.372673	0.00325097	1.29475	Q11107	NP_498678.3	Zinc finger protein lin-13 (Abnormal cell lineage protein 13)	multicellular organism development [GO:0007275]; negative regulation of vulval development [GO:0040027]; reproduction [GO:0000003]	DNA binding [GO:0003677]; metal ion binding [GO:0046872]		everted vulva, larval arrest, multivulva, organism morphology variant, protein subcellular localization variant, protruding vulva, sterile, sterile F1, transgene expression increased, transgene expression reduced	early larval lethal, larval arrest, male mating defective, male morphology variant, multivulva, sterile	arcade cell, body wall musculature, embryonic cell, excretory cell, gon_herm_dtc_A, gon_herm_dtc_P, head ganglion, head neuron, hyp7 syncytium, intestine, nervous system, neuron, P3.p hermaphrodite, P4.p hermaphrodite, P5.p hermaphrodite, P6.p hermaphrodite, P7.p hermaphrodite, P8.p hermaphrodite, reproductive system, seam cell, tail neuron, ventral cord neuron, vulva	ASER, body wall musculature, DA neuron, germ line, I5 neuron, intestine, neuron, retrovesicular ganglion, SAB, VA neuron	lin-13 encodes a large (2248-residue) nuclear protein with multiple zinc fingers of the C2H2 class and a LXCXE retinoblastoma protein-binding motif, that is required for survival through larval development and for negative regulation of vulval fates during postembryonic development.
WBGene00000733	col-160	F57B1.4	0.370822	0.00229191	1.29309	Q20921	NP_506284.2	COLlagen		structural constituent of cuticle [GO:0042302]		hyperinduction of antimicrobial peptide expression after infection	N.A.	N.A.	hypodermis, NSM, OLL, PVD, ventral nerve cord	col-160 is an ortholog of human MARCO (macrophage receptor with collagenous structure); col-160 is a structural constituent of cuticle, based on protein domain information.
WBGene00018293	F41E6.12	F41E6.12	0.364191	0.00280719	1.28716	O16465	NP_505226.2	Uncharacterized protein				embryonic lethal	N.A.	N.A.	germline precursor cell, hypodermis, OLL, PVD	RNA sequencing and microarray studies indicate that F41E6.12 is affected by Rotenone, Tunicamycin, D-glucopyranose, Multi-walled carbon nanotubes, D-glucose, Zidovudine, Humic substances, single-walled carbon nanotubes, Colistin, and Sirolimus; microarray and tiling array studies indicate that F41E6.12 is enriched in the germline precursor cell and hypodermis and in the PVD and OLL neurons.
WBGene00011050	agl-1	R06A4.8	0.361596	0.000443668	1.28485	O62334	NP_496984.1	AGL (Amylo-1,6-GLucosidase, 4-alpha-glucanotransferase) glycogen debranching enzyme	glycogen biosynthetic process [GO:0005978]; glycogen catabolic process [GO:0005980]	4-alpha-glucanotransferase activity [GO:0004134]; amylo-alpha-1,6-glucosidase activity [GO:0004135]		embryonic lethal	slow growth	N.A.	germ line	agl-1 encodes a protein orthologous to human amylo-alpha-1, 6-glucosidase, 4-alpha-glucanotransferase (AGL), also known as Glycogen Debrancher Enzyme (EC:2.4.1.25, 3.2.1.33); ALG is involved in the breakdown of the complex sugar, glycogen.
WBGene00020633	aakg-2	T20F7.6	0.359369	0.00200643	1.28286	O02168	NP_510725.1	AMP-Activated protein Kinase Gamma subunit		kinase activity [GO:0016301]		N.A.	N.A.	N.A.	excretory cell, neuron, OLL, PVD	aakg-2 encodes one of five C. elegans AMP kinase (AMPK) gamma regulatory subunits.
WBGene00000281	cah-3	K05G3.3	0.35423	0.000302667	1.2783	Q27504	NP_510674.1	Putative carbonic anhydrase 3 (EC 4.2.1.1) (Carbonate dehydratase 3)		carbonate dehydratase activity [GO:0004089]; zinc ion binding [GO:0008270]		peptide uptake by intestinal cell decreased, shortened life span	N.A.	head, intestine, muscle cell, neuron, pharynx, somatic cell, ventral nerve cord, vulva	AFD, ASER, DA neuron, I5 neuron, intestine, muscle cell, neuron, OLL, PVD, retrovesicular ganglion, SAB, VA neuron, ventral nerve cord	cah-3 encodes a putative carbonic anhydrase, closely similar to its paralog CAH-5; cah-3 is expressed in intestine and head (including neurons) of L3 larvae through adults, and its transcription is moderately stimulated by DBL-1 and SMA-2; CAH-3 is bound by CKU-80 in two-hybrid assays, but has no obvious function in mass RNAi assays.
WBGene00000121	aly-2	F23B2.6	0.348159	0.0030746	1.27294	O62183	NP_501594.1	Ref/ALY RNA export adaptor family		nucleic acid binding [GO:0003676]		locomotion variant, sterile progeny	N.A.	alimentary system, anal region, body wall, digestive tract, germ line, gonadal primordium, head, hypodermis, intestine, midbody, nervous system, pharynx, reproductive system, reproductive tract, stoma, tail	germ line, intestine	aly-2 encodes an RRM motif-containing protein required for normal export of TRA-1/tra-2 mRNA complexes, and thus for normal hermaphroditism; ALY-2 is orthologous to human THOC4 (OMIM:604171), and paralogous to ALY-1 and ALY-3; in the absence of TRA-1, and in conjunction with NXF-1, ALY-2 and its paralog ALY-1 are required to bind the TRE 3' UTR element of tra-2 mRNA, and block tra-2 mRNA's export…
WBGene00011760	T13H5.6	T13H5.6	0.346148	0.00338381	1.27116	Q9U369	NP_495801.1	Uncharacterized protein	regulation of sodium ion transport [GO:0002028]			cytoplasmic processing body variant, larval arrest, pattern of transgene expression variant, receptor mediated endocytosis defective, sterile, transgene subcellular localization variant	N.A.	head neuron, hmc, intestine, nervous system, pharynx, seam cell	body wall musculature, hypodermis, intestine, neuron, pharynx	T13H5.6 is an ortholog of members of the human NKAIN (Na+/K+ transporting ATPase interacting) family including NKAIN3; T13H5.6 is expressed in the pharynx, hmc, nervous system, seam cell, and the intestine.
WBGene00020742	T23H2.3	T23H2.3	0.345424	0.000879069	1.27052	P91494	NP_001032980.2	Uncharacterized protein		ATP binding [GO:0005524]		late larval arrest	N.A.	N.A.	germ line, seam cell	T23H2.3 is an ortholog of human TTF2 (transcription termination factor 2); T23H2.3 is predicted to have ATP binding activity, based on protein domain information.
WBGene00016746	C48B6.10	C48B6.10	0.345254	0.00102624	1.27037	Q95ZM3	NP_491974.1	Uncharacterized protein				N.A.	N.A.	N.A.	C, cephalic sheath cell, intestine	RNA sequencing and microarray studies indicate that C48B6.10 is affected by aak-2, alg-3, alg-4, emr-1, lem-2, clk-1, daf-16, npr-1, cox-5B, jmjd-3.1, jmjd-1.2, hsf-1, vgln-1, sma-2, sma-4, lin-22, gld-1, cdk-4, cyd-1, and gei-8; RNA sequencing studies indicate that C48B6.10 is affected by Rotenone; tiling array and RNA sequencing studies indicate that C48B6.10 is enriched in the cephalic sheath …
WBGene00010356	H03A11.1	H03A11.1	0.343342	0.00255917	1.26869	Q9XTW2	NP_510527.1	Extracellular serine/threonine protein kinase CeFam20 (CeFam20) (EC 2.7.11.1) (Golgi casein kinase) (Golgi-enriched fraction casein kinase) (GEF-CK)	protein phosphorylation [GO:0006468]	ATP binding [GO:0005524]; manganese ion binding [GO:0030145]; protein serine/threonine kinase activity [GO:0004674]		N.A.	N.A.	N.A.	AFD, body wall musculature, muscle cell, neuron, NSM, OLL, PVD	H03A11.1 encodes an FAM20 ortholog; murine FAM20A is a secreted protein expressed in hematopoietic cells.
WBGene00011625	vps-39	T08G5.5	0.341163	0.00376441	1.26678	Q1ZXS5	NP_001041164.1, NP_001041163.1, NP_001123010.1	Vacuolar protein sorting-associated protein 39 homolog	autophagy [GO:0006914]; vesicle-mediated transport [GO:0016192]			accumulated germline cell corpses, cell acidification defective, cell death variant, embryonic lethal, exploded through vulva, fat content reduced, lysosome-related organelle morphology variant, phagosome maturation defective, RAB-11 recycling endosome morphology variant, transgene expression increased, transgene expression variant, transgene subcellular localization variant	accumulated cell corpses, cell corpse degradation variant, chromosome segregation variant, dumpy, lethal, sterile	N.A.	germ line, intestine	vps-39 is an ortholog of human Vps39 (VPS39, HOPS complex subunit); microarray and RNA sequencing studies indicate that vps-39 is affected by cyc-1, tatn-1, emr-1, lem-2, gld-2, cox-5B, hsf-1, mafr-1, emb-4, sma-2, sma-4, sir-2.1, dpy-9, dpy-10, fbf-1, mir-243, rnp-8, gld-1, and lin-54; RNA sequencing and microarray studies indicate that vps-39 is affected by Zidovudine, Hydrolyzable Tannins, Hum…
WBGene00018656	F49H12.5	F49H12.5	0.328602	0.00391388	1.2558	Q9N5S7	NP_508381.1	ThioredoXin Domain Containing protein homolog	cell differentiation [GO:0030154]; negative regulation of cell death [GO:0060548]			no induction of antimicrobial peptide expression after infection	N.A.	N.A.	hypodermis, intestine, OLL, PVD	txdc-12.2 is an ortholog of human AGR3 (anterior gradient 3, protein disulphide isomerase family member), AGR2 (anterior gradient 2, protein disulphide isomerase family member) and TXNDC12 (thioredoxin domain containing 12); microarray and RNA sequencing studies indicate that txdc-12.2 is affected by Aldicarb, Methylmercury hydroxide, Zidovudine, Cholestanol, Chlorpyrifos, Quercetin, Humic substa…
WBGene00006961	xnp-1	B0041.7	0.286836	0.00199354	1.21996	Q9U7E0	NP_001020958.1	Transcriptional regulator ATRX homolog (EC 3.6.4.12) (ATP-dependent helicase xnp-1) (X-linked nuclear protein 1)	DNA repair [GO:0006281]; embryo development ending in birth or egg hatching [GO:0009792]; gonad development [GO:0008406]; hermaphrodite genitalia development [GO:0040035]; morphogenesis of an epithelium [GO:0002009]; reproduction [GO:0000003]; vulval development [GO:0040025]	ATP binding [GO:0005524]; DNA binding [GO:0003677]; helicase activity [GO:0004386]		accumulated germline cell corpses, apoptosis variant, everted vulva, gonad development variant, maternal sterile	N.A.	body wall musculature, dorsal nerve cord, germ line, gonadal sheath cell, gon_herm_dtc_A, gon_herm_dtc_P, head neuron, nerve ring, nervous system, spermathecal-uterine junction, tail neuron, ventral cord neuron, vulval precursor cell	AVA, body wall musculature, dorsal nerve cord, GABAergic neuron, germ line, lateral nerve cord, nerve ring, neuron, OLL, pharynx, PVD, somatic neuron, tail neuron, ventral nerve cord, vulval muscle	xnp-1 encodes an ATP-dependent DNA helicase of the SNF2 family that is orthologous to human XNP/ATR-X, which is associated with a number of X-linked mental retardation syndromes; in C. elegans, xnp-1 activity is required at high temperatures for embryogenesis, somatic gonad development, fertility, and vulval morphogenesis; in addition, animals doubly mutant for xnp-1 and lin-35/Rb, hpl-2/HP1, or …
WBGene00015680	egal-1	C10G6.1	-0.290254	0.0031196	0.817758	Q17902	NP_001021323.1, NP_001021324.1	Egalitarian protein homolog		3'-5' exonuclease activity [GO:0008408]; nucleic acid binding [GO:0003676]		exploded through vulva, locomotion variant, molt defect, nuclear positioning variant	lethal, sterile	N.A.	body wall muscle cell, body wall musculature, excretory cell, GABAergic neuron, intestine, muscle cell, neuron, OLL, PVD	egal-1 is predicted to have 3'-5' exonuclease activity and nucleic acid binding activity, based on protein domain information.
WBGene00009307	F32A11.1	F32A11.1	-0.313193	0.00241026	0.804859	O62198	NP_496794.1	Uncharacterized protein	regulation of MAPK cascade [GO:0043408]			dumpy, locomotion variant, shortened life span	N.A.	N.A.	germ line	F32A11.1 is an ortholog of human C3orf33 (chromosome 3 open reading frame 33); RNA sequencing, proteomic, and microarray studies indicate that F32A11.1 is affected by lin-39, gld-1, let-7, rpn-10, jmjd-1.2, hsf-1, mir-34, emb-4, lin-22, sir-2.1, slr-2, tdp-1, mir-35, and nuo-6; microarray studies indicate that F32A11.1 is affected by Sirolimus; RNA sequencing studies indicate that F32A11.1 is enr…
WBGene00000020	abt-2	F12B6.1	-0.317603	0.00301299	0.802402	Q1RS86	NP_001293361.1, NP_490949.3	ABC Transporter family	lipid transport [GO:0006869]	ATPase activity, coupled to transmembrane movement of substances [GO:0042626]; ATP binding [GO:0005524]		cell death variant, organism development variant, slow growth, tumorous germline	N.A.	N.A.	intestine, neuron	abt-2 encodes a predicted ATP-binding cassette (ABC) transporter that is a member of the ABCA subfamily of transport proteins; ABT-2 is predicted to function as a transmembrane protein that couples energy to transport of various molecules across membranes.
WBGene00003090	lys-1	Y22F5A.4	-0.322764	0.0035542	0.799537	O62415	NP_505642.1	Lysozyme-like protein 1	defense response to Gram-negative bacterium [GO:0050829]; defense response to Gram-positive bacterium [GO:0050830]; innate immune response [GO:0045087]			dauer constitutive, pathogen induced death increased, peptide uptake by intestinal cell decreased	N.A.	amphid neuron, head neuron, IL1 neuron, IL2 neuron, intestinal cell, intestine, phasmid neuron	germ line, intestine, pharyngeal muscle cell	lys-1 encodes a putative lysozyme, whose overexpression increases resistance to infection by Serratia marcescens; lys-1(RNAi) animals have normal resistance to S. marcescens, perhaps because of genetic redundancy with the LYS-1 paralogs LYS-2 to -8 and LYS-10; in uninfected animals, LYS-1 is expressed in the intestine and in IL1/IL2 neurons, along with a few unidentified head neurons; in intestin…
WBGene00017769	hmgs-1	F25B4.6	-0.323009	0.00268697	0.799401	P54871	NP_504496.1	Hydroxymethylglutaryl-CoA synthase (HMG-CoA synthase) (EC 2.3.3.10) (3-hydroxy-3-methylglutaryl coenzyme A synthase)	isoprenoid biosynthetic process [GO:0008299]; sterol biosynthetic process [GO:0016126]	hydroxymethylglutaryl-CoA synthase activity [GO:0004421]		avoids bacterial lawn, cell membrane organization biogenesis variant, chromosome condensation variant, cytoplasmic processing body variant, diakinesis progression during oogenesis variant, diplotene absent during oogenesis, diplotene region organization variant, embryo osmotic integrity defective early emb, embryonic lethal, exploded through vulva, foraging behavior variant, germ cell compartment…	N.A.	N.A.	germ line, OLL, PVD	F25B4.6 is orthologous to the human gene 3-HYDROXY-3-METHYLGLUTARYL COA SYNTHASE (HMGCS2; OMIM:600234), which when mutated leads to disease.
WBGene00000528	clh-1	T27D12.2	-0.324043	0.00243141	0.798828	Q22833	NP_001022373.1, NP_001022374.1	Chloride channel protein	chloride transmembrane transport [GO:1902476]	voltage-gated chloride channel activity [GO:0005247]		N.A.	N.A.	AMshL, AMshR, head, head ganglion, hyp1, hyp2, hyp3, hyp4, hyp5, hyp6, hypodermis, intestine, seam cell, spermatheca, vulD, vulva	AFD, ASER, germ line, male-specific, muscle cell, OLL, PLM, PVD	clh-1 encodes two CLC-type chloride channels via alternative splicing, homologous to human CLC1 (OMIM:118425) and CLC2 (OMIM:600570); CLH-1a and CLH-1b are required for maintenance of normal body shape; null mutations of clh-1 cause abnormal alae and a wider body than normal, with the body phenotype being reversible by culture medium of high osmolarity.
WBGene00015752	C14B9.2	C14B9.2	-0.329261	0.00076049	0.795944	P34329	NP_498775.2	Probable protein disulfide-isomerase A4 (EC 5.3.4.1) (ERp-72 homolog)	cell redox homeostasis [GO:0045454]; endoplasmic reticulum unfolded protein response [GO:0030968]; protein folding [GO:0006457]	protein disulfide isomerase activity [GO:0003756]		embryonic lethal, slow growth, small, sterile progeny	N.A.	N.A.	germ line, intestine, OLL, pharynx, PVD	C14B9.2 encodes a protein disulfide isomerase; by homology, the product of C14B9.2 is predicted to function in oxidative protein folding in the endoplasmic reticulum (ER); C14B9.2 transcript levels are increased in response to ER stress.
WBGene00014177	frg-1	ZK1010.3	-0.333856	0.00152723	0.793413	O18282	NP_499696.2	Protein FRG1 homolog	actin filament bundle assembly [GO:0051017]; muscle organ development [GO:0007517]; rRNA processing [GO:0006364]	actin filament binding [GO:0051015]; protein homodimerization activity [GO:0042803]; RNA binding [GO:0003723]		embryonic lethal, larval arrest, sister cell division timing asynchrony reduced, slow growth, sterile progeny	N.A.	N.A.	AVA, body wall muscle cell, coelomocyte, germ line, intestine	frg-1 encodes the C. elegans ortholog of vertebrate facioscapulohumeral muscular dystrophy (FSHD) region gene 1 (FRG1); FRG-1 binds F-actin in vitro and, as a multimer, exhibits actin-bundling activity; FRG-1 is expressed throughout the life cycle; in embryos, FRG-1 localizes to nucleoli and diffusely in the cytoplasm; in larvae and adults, FRG-1 also localizes to dense bodies in body wall muscle…
WBGene00004758	sek-1	R03G5.2	-0.337457	0.00381228	0.791435	G5EDF7	NP_509322.2	Dual specificity mitogen-activated protein kinase kinase sek-1 (MAP kinase kinase sek-1) (EC 2.7.12.2)	activation of MAPK activity [GO:0000187]; defense response to Gram-negative bacterium [GO:0050829]; defense response to Gram-positive bacterium [GO:0050830]; determination of left/right asymmetry in nervous system [GO:0035545]; innate immune response [GO:0045087]; MAPK cascade [GO:0000165]; negative regulation of neuron death [GO:1901215]; p38MAPK cascade [GO:0038066]; positive regulation of anti…	ATP binding [GO:0005524]; MAP kinase kinase activity [GO:0004708]; metal ion binding [GO:0046872]; mitogen-activated protein kinase kinase kinase binding [GO:0031435]; protein serine/threonine kinase activity [GO:0004674]; protein tyrosine kinase activity [GO:0004713]		cadmium response variant, chemical hypersensitive, gene expression level reduced, larval lethal, level of transgene expression variant, mitochondrial metabolism variant, organism oxidative stress response hypersensitive, organism pathogen response variant, organism toxic chemical response variant, pathogen induced death increased, pathogen induced gene expression variant, pathogen susceptibility …	aldicarb hypersensitive, anoxia resistant, axon morphology variant, cell stress response variant, copper hypersensitive, drug response variant, egg laying defective, egg laying response to food variant, endogenous synaptic event frequency reduced, GABA synaptic transmission variant, gene expression level reduced, genotoxic induced apoptosis variant, levamisole hypersensitive, loss of asymmetry AW…	excretory canal, linker cell, neuron, rectal epithelium, uv1, uv2, uv3	AFD, ASER, Psub1	sek-1 is an ortholog of human MAP2K3 (mitogen-activated protein kinase kinase 3) and MAP2K6 (mitogen-activated protein kinase kinase 6); sek-1 is involved in activation of MAPK activity, defense response to Gram-positive bacterium, determination of left/right asymmetry in nervous system, innate immune response, negative regulation of neuron death, p38MAPK cascade, positive regulation of ovipositi…
WBGene00021834	mab-31	Y54E10A.16	-0.345684	0.00294182	0.786935	Q9N3E2	NP_491129.1	Uncharacterized protein	nematode male tail tip morphogenesis [GO:0045138]; transforming growth factor beta receptor signaling pathway [GO:0007179]			Bacillus thuringiensis toxin hypersensitive, distal tip cell migration variant, egg laying variant, paralyzed, pore forming toxin hypersensitive, rays fused, reduced brood size	backward locomotion variant, male mating defective, rays fused, reduced brood size, spicules crumpled	AMsoL, AMsoR, hyp7 syncytium, intestine, pharynx, PHso1L, PHso1R, PHso2L, PHso2R, ray	intestine, OLL, PVD	mab-31 encodes a novel protein that is highly conserved amongst nematodes; mab-31 functions in the TGF-beta signaling pathway to regulate the male tail ray patterning process, specifically the positioning of the R7-derived ray cell cluster; a mab-31::gfp reporter is expressed in a wide variety of tissues, including the intestine, hypodermis, pharynx, and neuronal support cells; in males, mab-31::…
WBGene00006701	ubc-1	C35B1.1	-0.347858	0.00273575	0.78575	P52478	NP_500480.1	Ubiquitin-conjugating enzyme E2 1 (EC 2.3.2.23) (E2 ubiquitin-conjugating enzyme 1) (Ubiquitin carrier protein 1) (Ubiquitin-protein ligase 1)	DNA repair [GO:0006281]; histone ubiquitination [GO:0016574]; proteasome-mediated ubiquitin-dependent protein catabolic process [GO:0043161]; protein polyubiquitination [GO:0000209]; protein ubiquitination [GO:0016567]	ATP binding [GO:0005524]; ubiquitin conjugating enzyme activity [GO:0061631]; ubiquitin protein ligase activity [GO:0061630]; ubiquitin protein ligase binding [GO:0031625]		L1 arrest, larval arrest, larval lethal, lethal, reduced brood size, sick, sterile, transgene expression increased	N.A.	head, head neuron, hypodermis, intestine, nervous system, neuron, PVT, rectal gland cell, seam cell, tail, tail neuron	AFD, ASER, dopaminergic neuron, intestine, muscle cell, neuron	ubc-1 encodes an E2 ubiquitin-conjugating enzyme that contains a novel 40 amino acid C-terminal tail, and is homologous to Saccharomyces cerevisiae RAD6/UBC2 which is involved in DNA repair; although loss of UBC-1 activity via RNA-mediated interference (RNAi) does not result in any abnormalities, UBC-1 is able to complement the DNA repair defects of a Saccharomyces cerevisiae rad6 null mutant, su…
WBGene00000115	alh-9	F01F1.6	-0.35074	0.00126905	0.784182	P46562	NP_498263.2	Putative aldehyde dehydrogenase family 7 member A1 homolog (EC 1.2.1.3) (ALH-9)	cellular aldehyde metabolic process [GO:0006081]	aldehyde dehydrogenase (NAD) activity [GO:0004029]		N.A.	N.A.	ABa, seam cell	germ line, hypodermis, PLM	alh-9 is an ortholog of human ALDH7A1 (aldehyde dehydrogenase 7 family member A1); alh-9 is predicted to have oxidoreductase activity, acting on the aldehyde or oxo group of donors, based on protein domain information; alh-9 is expressed in the seam cell and the ABa.
WBGene00007048	nfx-1	C16A3.7	-0.350806	0.00261584	0.784146	Q18034	NP_498394.1	Transcriptional repressor NF-X1 homolog	negative regulation of transcription by RNA polymerase II [GO:0000122]; transcription by RNA polymerase II [GO:0006366]	RNA polymerase II regulatory region sequence-specific DNA binding [GO:0000977]; transcriptional repressor activity, RNA polymerase II proximal promoter sequence-specific DNA binding [GO:0001078]; zinc ion binding [GO:0008270]		N.A.	N.A.	N.A.	body wall muscle cell, coelomocyte, germ line, intestine	nfx-1 is an ortholog of human NFX1 (nuclear transcription factor, X-box binding 1); nfx-1 is predicted to have DNA-binding transcription factor activity, nucleic acid binding activity, and zinc ion binding activity, based on protein domain information.
WBGene00021331	glrx-10	Y34D9A.6	-0.351657	0.00310722	0.783683	Q9N456	NP_490812.1	GLutaRedoXin	cell redox homeostasis [GO:0045454]	electron transfer activity [GO:0009055]; protein disulfide oxidoreductase activity [GO:0015035]		N.A.	neuron degeneration variant	body wall musculature, intestine, pharynx, reproductive system, vulval muscle	ASER, body wall muscle cell, germ line, intestine, muscle cell	glrx-10 encodes a glutaredoxin, oxidoreductases of the thioredoxin family; by homology, GLRX-10 is predicted to function in regulation of the thiol redox state of proteins.
WBGene00001638	gly-13	B0416.6	-0.355688	0.0032859	0.781497	Q11068	NP_509566.1	Putative alpha-1,3-mannosyl-glycoprotein 2-beta-N-acetylglucosaminyltransferase (EC 2.4.1.101) (N-glycosyl-oligosaccharide-glycoprotein N-acetylglucosaminyltransferase I) (GNT-I) (GlcNAc-T I)	protein N-linked glycosylation [GO:0006487]	alpha-1,3-mannosylglycoprotein 2-beta-N-acetylglucosaminyltransferase activity [GO:0003827]; metal ion binding [GO:0046872]		organism pathogen response variant, pathogen induced death increased	N.A.	dorso-rectal ganglion, head ganglion, hypodermis, intestine, lumbar ganglion, muscle cell, preanal ganglion, ventral nerve cord, vulva	intestine	gly-13 encodes an experimentally verified UDP-N-acetylglucosamine alpha-3-D-mannoside beta-1,2-N-acetylglucosaminyltransferase I (GnT I), that is the primary GnT I enzyme in vivo, and that can act on unusual substrates; gly-13 is expressed throughout development in many cell types; a deletion allele of gly-13 is partially lethal with survivors displaying severe morphological and behavioral defect…
WBGene00000081	ads-1	Y50D7A.7	-0.356402	0.000966975	0.78111	O45218	NP_497185.1	Alkyldihydroxyacetonephosphate synthase (Alkyl-DHAP synthase) (EC 2.5.1.26) (Alkylglycerone-phosphate synthase)	ether lipid biosynthetic process [GO:0008611]	alkylglycerone-phosphate synthase activity [GO:0008609]; FAD binding [GO:0071949]; oxidoreductase activity, acting on CH-OH group of donors [GO:0016614]		embryonic lethal, larval arrest, slow growth	N.A.	intestine	germ line, intestine	ads-1 is an ortholog of human AGPS (alkylglycerone phosphate synthase; OMIM:603051) that is required for the biosynthesis of ether lipids; mutation of human AGPS leads to type 3 rhizomelic chondrodysplasia punctata (OMIM:600121).
WBGene00005078	src-2	F49B2.5	-0.357108	0.00215855	0.780728	O45539	NP_493502.1	Tyrosine protein-kinase src-2 (EC 2.7.10.2) (SRC oncogene related protein 2)	cell differentiation [GO:0030154]; cell migration [GO:0016477]; innate immune response [GO:0045087]; peptidyl-tyrosine autophosphorylation [GO:0038083]; pharynx development [GO:0060465]; regulation of cell proliferation [GO:0042127]; transmembrane receptor protein tyrosine kinase signaling pathway [GO:0007169]	ATP binding [GO:0005524]; metal ion binding [GO:0046872]; non-membrane spanning protein tyrosine kinase activity [GO:0004715]; signaling receptor binding [GO:0005102]		embryonic lethal, larval arrest, lethal, oocyte morphology variant, protruding vulva, reduced brood size, sick, sterile	N.A.	anus, pharyngeal muscle cell, vulva	N.A.	src-2 encodes a non-receptor protein tyrosine kinase that, along with src-1, is one of two C. elegans Src family kinase members; although src-2(RNAi) alone results in no overt phenotype, src-2(RNAi) performed in the background of retinoblastoma pathway mutants results in embryonic and larval lethality, as well as sterility; a src-2::GFP reporter fusion is expressed in pharyngeal muscles, the vulv…
WBGene00017467	F14F9.4	F14F9.4	-0.35979	0.00193937	0.779278	Q9GUC8	NP_504374.1	Uncharacterized protein				chemical resistant, embryonic lethal	N.A.	N.A.	gon_male_dtc anterior, gon_male_dtc posterior, intestine, muscle cell, Z1, Z1.p, Z4, Z4.a	Microarray and RNA sequencing studies indicate that F14F9.4 is affected by Hydrogen sulfide, Methylmercuric chloride, Rotenone, Juglone, 4-bromodiphenyl ether, Cadmium Chloride, Progesterone, Cry5B, Quercetin, Humic substances, Copper sulfate, Colistin, and Dafa#1; RNA sequencing studies indicate that F14F9.4 is enriched in the gon_male_dtc posterior, gon_male_dtc anterior, Z1.p, Z4.a, Z4, Z1, in…
WBGene00010660	K08D8.6	K08D8.6	-0.364981	0.0036646	0.776479	G5ECH9	NP_001294233.1, NP_502457.2	Uncharacterized protein				N.A.	N.A.	N.A.	intestine, neuron, pharyngeal muscle cell	RNA sequencing and microarray studies indicate that K08D8.6 is affected by Rotenone, D-glucopyranose, 4-bromodiphenyl ether, Zidovudine, Resveratrol, Deoxyglucose, Chlorpyrifos, Diazinon, Albendazole, Cry5B, Quercetin, Humic substances, R24, single-walled carbon nanotubes, Colistin, Dafa#1, and Sirolimus; tiling array, RNA sequencing, and microarray studies indicate that K08D8.6 is enriched in th…
WBGene00002272	lec-9	C16H3.2	-0.365614	0.00057079	0.776139	G5EC10	NP_510844.1	Galectin		carbohydrate binding [GO:0030246]; glycolipid binding [GO:0051861]		embryonic lethal	organism environmental stimulus response variant	N.A.	CEM, HOB, IL2 neuron, intestine, OLL, PVD, ray neuron type B	lec-9 encodes a predicted lectin that affects embryonic viability.
WBGene00019006	F57B10.9	F57B10.9	-0.365986	0.00288924	0.775938	O44735	NP_491888.2	SPG (Spastic paraplegia)	peroxisome inheritance [GO:0045033]			N.A.	N.A.	amphid neuron, dorsal nerve cord, head neuron, lateral nerve cord, nerve ring, nervous system, neuron, pharyngeal neuron, phasmid neuron, tail neuron, touch receptor neuron, ventral cord neuron	AFD, arcade cell, excretory cell, germ line, neuron, pharyngeal-intestinal valve cell	spg-20 is an ortholog of human SPG20 (spastic paraplegia 20 (Troyer syndrome)); spg-20 is expressed in the nervous system.
WBGene00021808	Y53G8AM.8	Y53G8AM.8	-0.366198	0.00265894	0.775824	Q9BL70	NP_497682.2	Uncharacterized protein		DNA binding [GO:0003677]		embryonic lethal	N.A.	N.A.	neuron	Y53G8AM.8 is predicted to have DNA binding activity, based on protein domain information.
WBGene00013550	Y75B8A.14	Y75B8A.14	-0.367945	0.00162561	0.774886	Q9XW68	NP_499587.1	Uncharacterized protein		GTPase activity [GO:0003924]		embryonic lethal	N.A.	N.A.	AVE, germ line, intestine	Y75B8A.14 is an ortholog of human GPN3 (GPN-loop GTPase 3); microarray, tiling array, RNA sequencing, and proteomic studies indicate that Y75B8A.14 is affected by cyc-1, daf-16, hpl-2, tatn-1, jmjd-3.1, let-418, chd-3, glp-1, pgl-1, pgl-3, glh-4, glh-1, sma-2, sma-4, smg-2, fbf-1, isp-1, and nuo-6; microarray studies indicate that Y75B8A.14 is affected by Atrazine, Cadmium, Cry5B, Humic substance…
WBGene00019914	clec-150	R06B10.3	-0.373018	0.00306082	0.772166	O44871	NP_497312.1	C-type LECtin		carbohydrate binding [GO:0030246]		N.A.	N.A.	N.A.	DA neuron, I5 neuron, intestine, retrovesicular ganglion, SAB, VA neuron	clec-150 is an ortholog of human CD209 (CD209 molecule) and members of the CD (CD molecules) family including FCER2 and CLEC (C-type lectin domain containing) family including CLEC6A; RNA sequencing and microarray studies indicate that clec-150 is affected by Zidovudine, Fluoranthene, Chlorpyrifos, Hydrolyzable Tannins, Humic substances, and Paraquat; tiling array, RNA sequencing, and microarray …
WBGene00004038	plc-3	T01E8.3	-0.373315	0.00235245	0.772007	Q22070	NP_496205.2	1-phosphatidylinositol 4,5-bisphosphate phosphodiesterase gamma plc-3 (EC 3.1.4.11) (Phosphoinositide phospholipase C-gamma plc-3) (Phospholipase C-gamma plc-3) (PLC-gamma plc-3)	intracellular signal transduction [GO:0035556]; phospholipid catabolic process [GO:0009395]; sleep [GO:0030431]	metal ion binding [GO:0046872]; phosphatidylinositol phospholipase C activity [GO:0004435]		apoptosis reduced, body wall muscle sarcomere morphology variant, cell membrane organization biogenesis variant, chromosome condensation variant, defecation contraction variant, diplotene region organization variant, endomitotic oocytes, germ cell compartment expansion variant, gonad sheath contraction rate reduced, intestinal physiology variant, maternal sterile, mitochondria alignment variant, …	lethal, quiescence variant, spontaneous spicule protraction, sterile	ALA, gonadal sheath cell, gubernacular retractor muscle, intestine, spermatheca, spicule protractor muscle, spicule retractor muscle, uterine toroidal epithelial cell, vas deferens, vas deferens valve cell	gon_male_dtc anterior, gon_male_dtc posterior, Z1.p, Z4.a	plc-3 encodes a phospholipase C gamma homolog; PLC-3 activity is required for regulation of a number of biological processes, including ovulatory sheath contractions, nose touch, behavioral quiescence, oscillatory Ca2+ signaling in the intestine, innate immunity, and response to wounding; plc-3 reporter fusions are expressed in sheath cells and the spermatheca, the intestine, embryonic cells incl…
WBGene00004004	pgp-10	C54D1.1	-0.374097	0.00221529	0.771588	Q18824	NP_509205.2	p-GlycoProtein related		ATPase activity, coupled to transmembrane movement of substances [GO:0042626]; ATP binding [GO:0005524]		N.A.	N.A.	hypodermis, intestine	germ line, hypodermis, male-specific	pgp-10 encodes an ATP-binding protein that is a member of the P-glycoprotein subclass of the ATP-binding cassette (ABC) transporter superfamily; PGP-10 is predicted to function as a transmembrane protein that couples energy to transport of various molecules across membranes, but as loss of pgp-10 activity via RNAi results in no obvious defects, the exact role of pgp-10 in C. elegans development a…
WBGene00001080	dpy-21	Y59A8B.1	-0.374526	0.000816075	0.771359	Q9GRZ3	NP_001024266.1	Lysine-specific demethylase 9 (KDM9) (EC 1.14.11.-) (Dosage compensation protein dpy-21)	regulation of transcription, DNA-templated [GO:0006355]; transcription, DNA-templated [GO:0006351]	dioxygenase activity [GO:0051213]; metal ion binding [GO:0046872]		exploded through vulva, level of protein expression variant, masculinized, transgene expression variant, X0 lethal	dosage compensation variant, dumpy, egg laying defective, gene expression level high, gene expression variant, histone methylation variant, lethal, mRNA levels increased, X linked gene expression enhanced, X linked gene expression reduced, XX lethal, XXX progeny	N.A.	ASER, germ line, intestine	dpy-21 encodes a novel, conserved protein with a proline-rich N terminus; dpy-21 affects RNA levels of X-linked dosage-compensated genes, body length in hermaphrodites, and fertility and male tail development in males; DPY-21 interacts in vivo with DPY-27 and SDC-3, members of the dosage compensation complex, and like members of the dosage compensation complex, is diffusely localized in nuclei of…
WBGene00022458	prp-31	Y110A7A.8	-0.375951	0.00144088	0.770597	Q9N592	NP_491527.1	Yeast PRP (Splicing factor) related	mRNA splicing, via spliceosome [GO:0000398]; spliceosomal tri-snRNP complex assembly [GO:0000244]			cell proliferation increased, embryonic lethal, embryonic lethal late emb, excess intestinal cells, exploded through vulva, germ cell development variant, gonad migration variant, gonad morphology variant, late embryonic arrest, lethal, locomotion variant, maternal sterile, molt defect, oocyte morphology variant, oocytes disorganized, protein aggregation variant, protruding vulva, reduced brood s…	lethal, sterile	N.A.	germ line	prp-31 is orthologous to the human gene U4/U6 small nuclear ribonucleoprotein Prp31 (PRPF31); prpf31 is a component of the spliceosome complex.
WBGene00013266	Y57A10A.26	Y57A10A.26	-0.377623	0.00364046	0.769705	Q9NA74	NP_496604.1	Uncharacterized protein				N.A.	N.A.	N.A.	hypodermis	Y57A10A.26 is an ortholog of human FAXC (failed axon connections); microarray and RNA sequencing studies indicate that Y57A10A.26 is affected by Lithium Chloride, 1-methylnicotinamide, D-glucose, Atrazine, Cadmium, Hydrolyzable Tannins, Humic substances, and Sirolimus; tiling array and proteomic studies indicate that Y57A10A.26 is enriched in the hypodermis.
WBGene00044260	Y87G2A.19	Y87G2A.19	-0.377859	0.00135313	0.769579	Q56VY4	NP_001021835.1	Uncharacterized protein				N.A.	N.A.	N.A.	arcade cell, pharyngeal muscle cell, pharyngeal-intestinal valve cell	Y87G2A.19 is an ortholog of human NUDT7 (nudix hydrolase 7); proteomic, RNA sequencing, and microarray studies indicate that Y87G2A.19 is affected by nhr-49, wdr-23, eat-2, tatn-1, hlh-30, daf-2, jmjd-3.1, jmjd-1.2, mir-34, sma-2, and sma-4; RNA sequencing studies indicate that Y87G2A.19 is affected by D-glucose and Zidovudine; tiling array, RNA sequencing, and proteomic studies indicate that Y87…
WBGene00010083	F55B11.1	F55B11.1	-0.379472	0.00258404	0.768719	O17892	NP_502747.1	Xanthine DeHydrogenase homolog	xanthine catabolic process [GO:0009115]	2 iron, 2 sulfur cluster binding [GO:0051537]; electron transfer activity [GO:0009055]; flavin adenine dinucleotide binding [GO:0050660]; iron ion binding [GO:0005506]; oxidoreductase activity, acting on CH-OH group of donors [GO:0016614]; oxidoreductase activity, acting on the aldehyde or oxo group of donors [GO:0016903]; xanthine dehydrogenase activity [GO:0004854]; xanthine oxidase activity [G…		extended life span	N.A.	N.A.	intestine, pharyngeal muscle cell	The F55B11.1 gene encodes an ortholog of the human gene XANTHINE DEHYDROGENASE (XDH), which when mutated leads to xanthinuria (OMIM:278300).
WBGene00018704	ztf-13	F52E4.8	-0.381464	0.00301283	0.767658	O01933	NP_508531.2	Zinc finger putative Transcription Factor family		nucleic acid binding [GO:0003676]		transgene expression reduced	lethal, sterile	N.A.	intestine	ztf-13 is predicted to have nucleic acid binding activity, based on protein domain information.
WBGene00001754	gst-6	F11G11.3	-0.385213	0.00141261	0.765666	P91252	NP_494882.2	Probable glutathione S-transferase 6 (EC 2.5.1.18) (GST class-sigma)	innate immune response [GO:0045087]	glutathione transferase activity [GO:0004364]		dauer lifespan extended, enzyme activity reduced, organism electrophilic stress hypersensitive	N.A.	N.A.	ASER, intestine, OLL, pharyngeal muscle cell, PVD	gst-6 encodes a predicted glutathione S-transferase.
WBGene00000022	abt-4	Y39D8C.1	-0.391362	0.00132048	0.762409	Q9TXV8	NP_503175.1	ABC Transporter family	lipid transport [GO:0006869]	ATPase activity, coupled to transmembrane movement of substances [GO:0042626]; ATP binding [GO:0005524]		N.A.	N.A.	AMsoL, AMsoR, head, head neuron, hypodermis, intestine, nervous system, pharyngeal neuron, pharyngeal-intestinal valve, pharynx, rectal gland cell, tail	body wall musculature, dorsal nerve cord, intestine, nerve ring, NSM, OLL, pharyngeal muscle cell, PVD, somatic neuron, tail neuron, ventral nerve cord, vulval muscle	abt-4 encodes a predicted ATP-binding cassette (ABC) transporter that is a member of the ABCA subfamily of transport proteins; ABT-4 is predicted to function as a transmembrane protein that couples energy to transport of various molecules across membranes, but as loss of abt-4 activity via RNAi results in no obvious defects, the precise role of abt-4 in C. elegans development and/or behavior is n…
WBGene00012362	W09D10.4	W09D10.4	-0.391567	0.00130962	0.762301	O18183	NP_499362.1	Uncharacterized protein		catalytic activity [GO:0003824]		N.A.	N.A.	N.A.	N.A.	W09D10.4 is an ortholog of human PPTC7 (PTC7 protein phosphatase); W09D10.4 is predicted to have catalytic activity, based on protein domain information.
WBGene00011331	T01E8.1	T01E8.1	-0.392121	0.00341364	0.762008	G5EF30	NP_496203.2	Uncharacterized protein				N.A.	N.A.	N.A.	body wall musculature, intestine, muscle cell	RNA sequencing and microarray studies indicate that T01E8.1 is affected by Zidovudine, Humic substances, and Sirolimus; RNA sequencing and microarray studies indicate that T01E8.1 is enriched in the muscle cell, intestine, and body wall musculature.
WBGene00003091	lys-2	Y22F5A.5	-0.393513	0.00189426	0.761273	O62416	NP_505643.1	Lysozyme-like protein 2	defense response to Gram-negative bacterium [GO:0050829]; defense response to Gram-positive bacterium [GO:0050830]; innate immune response [GO:0045087]; peptidoglycan catabolic process [GO:0009253]	lysozyme activity [GO:0003796]		dauer constitutive, pathogen induced death increased, pathogen susceptibility increased, peptide uptake by intestinal cell decreased	organism environmental stimulus response variant, pathogen susceptibility increased	N.A.	intestine, OLL, pharyngeal muscle cell, PVD	lys-2 is one of ten C. elegans lysozyme genes; as such, lys-2 can be predicted to have a role in lysozymal function including immune function.
WBGene00002271	lec-8	R07B1.10	-0.395078	0.0016124	0.760448	Q09610	NP_509649.1	Probable galaptin lec-8	defense response to Gram-positive bacterium [GO:0050830]; endoplasmic reticulum unfolded protein response [GO:0030968]; response to toxic substance [GO:0009636]	carbohydrate binding [GO:0030246]; glycolipid binding [GO:0051861]		N.A.	organism toxic chemical response variant	intestine, pharyngeal-intestinal valve, tail, virL, virR	GABAergic neuron, germ line, intestine, pharynx	lec-8 encodes a glycolipid-binding galectin; LEC-8 binds glycolipids and can inhibit Bacillus thuringiensis Cry5B from binding glycolipids; lec-8 mutants are more susceptible to Cry5B; lec-8 is expressed in the pharyngeal-intestinal valve, the intestinal-rectal valve, and in some vesicles of the intestine; lec-8 expression in the intestine is induced in response to bacterial infection and Cry5B, …
WBGene00004405	rop-1	C12D8.11	-0.39511	0.00251135	0.760432	Q27274	NP_505638.1	60 kDa SS-A/Ro ribonucleoprotein homolog		metal ion binding [GO:0046872]; RNA binding [GO:0003723]		dauer constitutive, organism development variant	N.A.	Cell, intestine, neuron	germ line	rop-1 encodes an RNAi-binding protein that is orthologous to the vertebrate 60-kDa Ro autoantigen that is the protein component of the Ro ribonucleoprotein (RNP) complex; ROP-1 binds the single C. elegans Ro RNP RNA component, YRN-1 (Y RNA) in vivo and although loss of rop-1 activity via mutation results in no obvious visible phenotypes, it does result in a dramatic decrease in YRN-1 levels, indi…
WBGene00003408	mrp-2	F57C12.4	-0.396423	0.00119041	0.75974	Q20943	NP_508121.1	Uncharacterized protein	transmembrane transport [GO:0055085]	ATPase activity, coupled to transmembrane movement of substances [GO:0042626]; ATP binding [GO:0005524]		N.A.	N.A.	excretory cell, head neuron, intestine, nervous system, pharynx, reproductive system, tail neuron, vulval muscle	AFD, ASER, PLM	mrp-2 encodes a predicted multidomain transmembrane protein that is a member of the ATP-binding cassette (ABC) superfamily of transport proteins and is homologous to the human multidrug resistance-associated protein 1 (MRP1, OMIM:158343); by homology, MRP-2 is predicted to function as a membrane pump that couples the energy of ATP hydrolysis to membrane transport; as loss of MRP-2 function via RN…
WBGene00019686	K12H6.6	K12H6.6	-0.39761	0.00204549	0.759115	Q9N5G9	NP_494378.1	Uncharacterized protein				N.A.	N.A.	N.A.	excretory cell, GABAergic neuron	K12H6.6 is an ortholog of human TLCD1 (TLC domain containing 1) and TLCD2 (TLC domain containing 2); microarray, tiling array, RNA sequencing, and proteomic studies indicate that K12H6.6 is affected by cyc-1, daf-12, ham-3, npr-1, kgb-1, mir-34, glp-1, pgl-1, pgl-3, glh-4, glh-1, emb-4, sir-2.1, dcr-1, and alg-1; microarray studies indicate that K12H6.6 is affected by Paraquat and Sirolimus; tili…
WBGene00000269	bre-4	Y73E7A.7	-0.399949	0.00275462	0.757885	Q9GUM2	NP_490872.1, NP_001293407.1	Beta-1,4-N-acetylgalactosaminyltransferase bre-4 (EC 2.4.1.-) (Bacillus thuringiensis toxin-resistant protein 4) (Bt toxin-resistant protein 4) (Beta-4-GalNAcT)	carbohydrate metabolic process [GO:0005975]; positive regulation of Notch signaling pathway [GO:0045747]; protein glycosylation [GO:0006486]; response to toxic substance [GO:0009636]	acetylgalactosaminyltransferase activity [GO:0008376]; beta-1,4-N-acetylgalactosaminyltransferase activity [GO:0033207]; metal ion binding [GO:0046872]		N.A.	Bacillus thuringiensis toxin resistant, brood size variant, organism toxic chemical response variant, pore forming toxin resistant, quiescence variant	N.A.	germ line	bre-4 encodes a beta-1,4-N-acetylgalactosaminyltransferase that is required for the toxicity of Bacillus thuringiensis Cry5B.
WBGene00020251	camt-1	T05C1.4	-0.401357	0.000349361	0.757146	H2KY84	NP_494796.2, NP_001022314.1, NP_494795.2	CAMTA (CAlModulin-binding Transcriptional activator)	positive regulation of transcription by RNA polymerase II [GO:0045944]	sequence-specific DNA binding [GO:0043565]; transcriptional activator activity, RNA polymerase II proximal promoter sequence-specific DNA binding [GO:0001077]		dauer lifespan extended, embryonic lethal	N.A.	N.A.	dopaminergic neuron, intestine, neuron, OLL, PVD	T05C1.4 encodes, by alternative splicing, two members of the CAMTA family of calmodulin-binding transcriptional activators that are required for embryonic development; CAMTA proteins are conserved in animals and plants but absent from unicellular eukaryotes, and may thus represent a transcriptional activator specific to multicellular organisms; the common organization of CAMTA proteins is to have…
WBGene00022358	Y92H12A.2	Y92H12A.2	-0.40279	0.00238436	0.756394	A0A061ACQ8	NP_490865.4, NP_001293292.1	Uncharacterized protein		ubiquitin-protein transferase activity [GO:0004842]		N.A.	N.A.	N.A.	ASER, intestine	Y92H12A.2 is an ortholog of human Nedd4 (neural precursor cell expressed, developmentally down-regulated 4, E3 ubiquitin protein ligase) and NEDD4L (neural precursor cell expressed, developmentally down-regulated 4-like, E3 ubiquitin protein ligase); Y92H12A.2 is predicted to have ubiquitin protein ligase activity, based on protein domain information.
WBGene00012559	epg-3	Y37D8A.22	-0.40498	0.00313476	0.755247	Q9XWU8	NP_499688.2	Ectopic P granules protein 3	endoplasmic reticulum organization [GO:0007029]; exocytosis [GO:0006887]; Golgi organization [GO:0007030]; macroautophagy [GO:0016236]; negative regulation of autophagosome assembly [GO:1902902]			avoids bacterial lawn, cell secretion variant, growth variant, slow growth, transgene subcellular localization variant	accumulated somatic cell corpses, autophagy variant, germ cell cytoplasmic morphology variant, lethal, P granule defective, protein aggregation variant, protein degradation variant, protein metabolism variant, sterile	body wall musculature, intestine, pharyngeal muscle cell, pharynx	pharyngeal muscle cell	epg-3 is an ortholog of human VMP1 (vacuole membrane protein 1); epg-3 is involved in macroautophagy; epg-3 is expressed in the pharynx, intestine, and the body wall musculature; epg-3 is localized to the cytoplasm.
WBGene00002128	inx-6	C36H8.2	-0.406534	0.0023209	0.754434	Q9U3N4	NP_502435.1	Innexin-6 (Protein opu-6)	ion transport [GO:0006811]	gap junction channel activity [GO:0005243]; gap junction hemi-channel activity [GO:0055077]		early larval arrest	L1 arrest, pharyngeal pumping reduced, procorpus contraction defective, starved	AVDL, AVDR, AVKL, AVKR, marginal cell, mc2, pharyngeal epithelial cell, pharynx, pm1, pm2, pm3, pm4, pm6, RIS, URBL, URBR, virL, virR	pharyngeal muscle cell, pharynx, RID	inx-6 encodes an innexin, an integral transmembrane channel protein that is a structural component of invertebrate gap junctions; INX-6 is required for formation of pharyngeal gap junctions and thus for the electrical coupling and synchronous muscle contractions necessary for normal feeding behavior and postembryonic development; INX-6 may function redundantly with EAT-5, another C. elegans innex…
WBGene00008132	gale-1	C47B2.6	-0.40798	0.00105149	0.753678	Q564Q1	NP_001021051.1, NP_001021052.1	UDP-glucose 4-epimerase (EC 5.1.3.2) (Galactowaldenase) (UDP-N-acetylgalactosamine 4-epimerase) (UDP-GalNAc 4-epimerase) (UDP-N-acetylglucosamine 4-epimerase) (UDP-GlcNAc 4-epimerase) (EC 5.1.3.7) (UDP-galactose 4-epimerase)	cuticle development [GO:0042335]; defense response to Gram-positive bacterium [GO:0050830]; embryo development ending in birth or egg hatching [GO:0009792]; galactose metabolic process [GO:0006012]; gonad morphogenesis [GO:0035262]; negative regulation of endoplasmic reticulum unfolded protein response [GO:1900102]; nematode larval development [GO:0002119]; positive regulation of vulval developme…	UDP-glucose 4-epimerase activity [GO:0003978]; UDP-N-acetylglucosamine 4-epimerase activity [GO:0003974]		N.A.	dietary sugar response variant, galactose metabolism variant, gonad migration variant, gonad morphology variant, hypersensitive to galactose, lethal, level of transgene expression variant, pathogen susceptibility increased, slow development, sterile, vulval invagination variant L4	head, head neuron, hypodermis, intestine, nervous system, neuron, reproductive system, uterus	germ line, germline precursor cell	gale-1 encodes a putative UDP-galactose-4-epimerase, orthologous to human GALE (OMIM:606953, mutated in galactose epimerase deficiency); GALE-1 is thought to interconvert UDP-N-acetylglucosamine and UDP-N-acetylgalactosamine at the end of the hexosamine pathway; gale-1 is expressed in neurons, intestine and the developing reproductive system, but has no observed function in mass RNAi assays.
WBGene00005024	sqv-6	Y50D4C.4	-0.408953	0.00174616	0.75317	Q965Q8	NP_503359.2, NP_001300280.1, NP_001300279.1	Xylosyltransferase sqv-6 (EC 2.4.2.26) (Peptide O-xylosyltransferase) (Squashed vulva protein 6)	chondroitin sulfate biosynthetic process [GO:0030206]; heparan sulfate proteoglycan biosynthetic process [GO:0015012]; heparin biosynthetic process [GO:0030210]; morphogenesis of an epithelium [GO:0002009]; oviposition [GO:0018991]; reproduction [GO:0000003]; UDP-D-xylose metabolic process [GO:0033319]; vulval development [GO:0040025]	acetylglucosaminyltransferase activity [GO:0008375]; protein xylosyltransferase activity [GO:0030158]		cytokinesis variant emb, life span variant, locomotion variant, multiple nuclei early emb, reduced brood size, small	bloated, egg laying defective, hermaphrodite self sterile, hermaphrodite sterile, neuron cell body absent misplaced, one cell arrest early emb, oocyte morphology variant, squashed vulva, vulval invagination variant L4	N.A.	germ line, seam cell	sqv-6 encodes a xylosyltransferase, active in cell culture, that is required for cytokinesis of one-cell embryos and for vulval morphogenesis; SQV-6 is predicted to begin the synthesis of glycosaminoglycans by adding xylose to their protein cores; the common requirement for SQV-6 in both cytokinesis and morphogenesis may be to promote filling an extracellular space with hygroscopic proteoglycans …
WBGene00017939	F31A3.5	F31A3.5	-0.409881	0.00194556	0.752686	P90857	NP_510840.2	Uncharacterized protein				transgene expression increased	N.A.	N.A.	germ line, intestine, OLL, PVD	Microarray studies indicate that F31A3.5 is affected by Quercetin and Paraquat; microarray and RNA sequencing studies indicate that F31A3.5 is enriched in the germ line and intestine and in the PVD and OLL neurons.
WBGene00011055	arrd-14	R06B9.4	-0.414385	0.000718525	0.750339	O17983	NP_496881.1	ARRestin Domain protein	signal transduction [GO:0007165]			N.A.	N.A.	N.A.	arcade cell, ASER, hypodermis, pharyngeal-intestinal valve cell, PLM	arrd-14 is an ortholog of human ARRDC1 (arrestin domain containing 1); RNA sequencing and microarray studies indicate that arrd-14 is affected by Rotenone, D-glucopyranose, and Chlorpyrifos; tiling array and RNA sequencing studies indicate that arrd-14 is enriched in the hypodermis, arcade cell, and pharyngeal-intestinal valve cell and in the ASER and PLM neurons.
WBGene00001330	eps-8	Y57G11C.24	-0.414987	0.000938148	0.750026	A0A061ACP8	NP_001041048.1, NP_001293928.1, NP_001293927.1, NP_001041047.1, NP_001023522.2, NP_001293929.1, NP_502803.3, NP_001293931.1, NP_001023521.2, NP_001293930.1	EPS (Human endocytosis) related	actin filament bundle assembly [GO:0051017]; barbed-end actin filament capping [GO:0051016]; digestive tract morphogenesis [GO:0048546]; embryonic morphogenesis [GO:0048598]; epidermis morphogenesis [GO:0048730]; intermediate filament organization [GO:0045109]; maintenance of protein location [GO:0045185]; nematode larval development [GO:0002119]	actin filament binding [GO:0051015]; cytoskeletal protein binding [GO:0008092]		avoids bacterial lawn, clear, constipated, embryonic lethal, foraging behavior variant, gut granule development variant, intestinal morphology variant, L1 arrest, larval arrest, larval lethal, locomotion variant, multivulva, muscle attachment variant, pale, pattern of transgene expression variant, receptor mediated endocytosis defective, reduced brood size, slow growth, sterile, three fold arrest…	actin cytoskeleton filament morphology variant, body elongation retracted, body elongation variant, embryonic lethal, larval arrest, muscle attachment variant, muscle cell activity variant, protein subcellular localization variant, three fold arrest	head neuron, hyp7, hypodermis, intestine, muscle cell, nervous system, neuron, P3.p hermaphrodite, P4.p hermaphrodite, P5.p hermaphrodite, P5.pa, P5.paa, P5.pap, P5.pp, P5.ppa, P6.p hermaphrodite, P6.pa, P6.paa, P6.pap, P6.pp, P6.ppa, P6.ppp, P7.p hermaphrodite, P7.pa, P7.pap, P7.pp, P7.ppa, P7.ppp, P8.p hermaphrodite, P9.p, P10.p, P11.p, P12.p, pharynx, seam cell, uterine seam cell, vulval cell	intestine, OLL, PVD	eps-8 is encodes a cell signaling adaptor protein that contains and N-terminal PTB domain, and C-terminal SH3 and actin-binding domains; EPS-8 is essential for epidermal and intestinal cells morphogenesis; eps-8 is also involved in trafficking of the LET-23 EGF receptor during vulval development; EPS-8 physically interacts with the ankyrin repeat protein VAB-19 and demonstrates a novel actin barb…
WBGene00021977	Y58A7A.3	Y58A7A.3	-0.418706	0.000862435	0.748095	Q966A6	NP_504360.1	Uncharacterized protein				N.A.	N.A.	N.A.	AFD, amphid sheath cell, ASER, hypodermis, intestine, Z1, Z4	RNA sequencing and microarray studies indicate that Y58A7A.3 is affected by Ethanol, 1-methylnicotinamide, Methylmercuric chloride, D-glucopyranose, Levamisole, Zidovudine, Deoxyglucose, Cry5B, Quercetin, Humic substances, Colistin, and Dafa#1; tiling array and RNA sequencing studies indicate that Y58A7A.3 is enriched in the hypodermis, Z4, Z1, amphid sheath cell, and intestine and in the AFD and…
WBGene00016920	C54E4.5	C54E4.5	-0.423761	0.000692737	0.745478	Q65CM5	NP_500170.3	Uncharacterized protein	inositol catabolic process [GO:0019310]	inositol oxygenase activity [GO:0050113]; iron ion binding [GO:0005506]		N.A.	N.A.	N.A.	germline precursor cell, hypodermis	C54E4.5 is an ortholog of human MIOX (myo-inositol oxygenase); C54E4.5 is predicted to have inositol oxygenase activity and iron ion binding activity, based on protein domain information.
WBGene00018275	F41C3.11	F41C3.11	-0.425252	0.00112507	0.744709	Q20261	NP_494844.3	Uncharacterized protein				dauer lifespan extended	N.A.	N.A.	hypodermis, muscle cell, OLL, PVD	RNA sequencing and microarray studies indicate that F41C3.11 is affected by Zidovudine, Resveratrol, Quercetin, Colistin, Dafa#1, and Sirolimus; microarray, tiling array, and RNA sequencing studies indicate that F41C3.11 is enriched in the hypodermis and muscle cell and in the PVD and OLL neurons.
WBGene00020740	T23F4.2	T23F4.2	-0.429364	0.00378863	0.742589	A0A0S4XRI4	NP_001305231.1, NP_001305233.1, NP_001305232.1, NP_493923.2	Uncharacterized protein				dauer lifespan extended	N.A.	N.A.	intestine, OLL, PVD	RNA sequencing and microarray studies indicate that T23F4.2 is affected by Rotenone, Rifampin, Zidovudine, Cry5B, Chlorpyrifos, Diazinon, Humic substances, and Sirolimus; tiling array, proteomic, and microarray studies indicate that T23F4.2 is enriched in the intestine and in the PVD and OLL neurons.
WBGene00002257	lbp-5	W02D3.7	-0.42997	5.39959e-05	0.742277	O01814	NP_491928.1	Fatty acid-binding protein homolog 5		fatty acid binding [GO:0005504]		autophagy variant, axon midline crossing variant, cord commissures fail to reach target, fat content increased, life span variant, locomotion variant, ventral cord patterning variant	fat content increased, gene expression level reduced, gene expression variant, organism environmental stimulus response variant, reduced brood size	arcade cell, hypodermis, intestine, pharynx, reproductive system, seam cell, tail, vulva	ASER, intestine	lbp-5 encodes a predicted intracellular fatty acid binding protein (iFABP) that is most similar to the vertebrate muscle and heart FABPs; by homology, LBP-5 is predicted to function as an intracellular transporter for small hydrophobic molecules such as lipids and steroid hormones; loss of lbp-5 activity via large-scale RNAi screens indicates that, in C. elegans, LBP-5 is required for movement.
WBGene00008431	piga-1	D2085.6	-0.432206	0.00286441	0.741128	Q18993	NP_495840.1	PhosphatidylInositol-Glycan biosynthesis class A protein	GPI anchor biosynthetic process [GO:0006506]	phosphatidylinositol N-acetylglucosaminyltransferase activity [GO:0017176]		high incidence male progeny	lethal, sterile	N.A.	germ line, intestine	D2085.6 is orthologous to the human gene CLASS A GLCNAC-INOSITOL PHOSPHOLIPID ASSEMBLY PROTEIN (PIGA; OMIM:311770), which when mutated leads to paroxysmal nocturnal hemoglobinuria.
WBGene00016860	cyp-33C9	C50H11.15	-0.436115	0.00353553	0.739122	O16482	NP_503846.1	CYtochrome P450 family		heme binding [GO:0020037]; iron ion binding [GO:0005506]; oxidoreductase activity, acting on paired donors, with incorporation or reduction of molecular oxygen [GO:0016705]; steroid hydroxylase activity [GO:0008395]		N.A.	organism hypersensitive desiccation	N.A.	intestine	cyp-33C9 is an ortholog of human CYP2J2 (cytochrome P450 family 2 subfamily J member 2), CYP2R1 (cytochrome P450 family 2 subfamily R member 1) and CYP2U1 (cytochrome P450 family 2 subfamily U member 1); cyp-33C9 is predicted to have heme binding activity, iron ion binding activity, and oxidoreductase activity, acting on paired donors, with incorporation or reduction of molecular oxygen, based on…
WBGene00020376	T09B4.2	T09B4.2	-0.436164	0.00183106	0.739097	O02163	NP_491782.1	Uncharacterized protein				embryonic lethal	activity level variant, frequency body bend reduced, L1 arrest, lawn leaving behavior variant, lethal, pharyngeal contraction defective, thrashing reduced	N.A.	germ line, germline precursor cell	Proteomic, RNA sequencing, and microarray studies indicate that T09B4.2 is affected by gld-1, let-7, tatn-1, pgl-1, pgl-3, glh-4, glh-1, emb-4, sma-2, sma-4, sir-2.1, ain-1, fbf-1, mir-243, and daf-19; RNA sequencing and microarray studies indicate that T09B4.2 is affected by Manganese chloride, Hydrolyzable Tannins, Paraquat, Sirolimus, and Allantoin; tiling array and RNA sequencing studies indi…
WBGene00003996	pgp-2	C34G6.4	-0.438009	0.00173354	0.738153	A0A0K3AQN5	NP_001300410.1, NP_001300411.1, NP_001300412.1, NP_491707.2	ABC transporter PGP-2 (p-GlycoProtein related)	lipid storage [GO:0019915]; organelle organization [GO:0006996]	ATPase activity, coupled to transmembrane movement of substances [GO:0042626]; ATP binding [GO:0005524]		fat content reduced, gut granule biogenesis reduced, gut granule morphology variant, lysosome-related organelle localization variant, lysosome-related organelle morphology variant, persistence of paternal mitochondria	endogenous zinc levels reduced, hypersensitive to zinc deficiency, iron homeostasis variant, zinc toxicity hypersensitive	AWAL, AWAR, head neuron, hypodermis, intestine, nerve ring, nervous system, pharynx, tail neuron, ventral cord neuron	body wall musculature, dorsal nerve cord, intestine, lateral nerve cord, nerve ring, pharyngeal muscle cell, pharynx, somatic neuron, tail neuron, ventral nerve cord, vulval muscle	pgp-2 encodes a member of the ABC transporter family with highest similarity to the vertebrate MDR (multidrug resistance) family and that is orthologous to human MDR1 (ABCB1; OMIM:171050, mutated in Crohn disease); during development, pgp-2 activity is required, in parallel with that of the AP-3 adaptor complex, for the proper formation of gut granules, lysosome-related organelles found in the C.…
WBGene00015509	C06A6.4	C06A6.4	-0.438581	0.000417311	0.73786	Q5WRS4	NP_001021301.1, NP_001021300.1	Aminoacylase	cellular amino acid metabolic process [GO:0006520]	aminoacylase activity [GO:0004046]; metallopeptidase activity [GO:0008237]		N.A.	N.A.	N.A.	coelomocyte, germ line, germline precursor cell, muscle cell	C06A6.4 is an ortholog of human ACY1 (aminoacylase 1) and ABHD14A-ACY1 (ABHD14A-ACY1 readthrough); C06A6.4 is predicted to have aminoacylase activity, based on protein domain information.
WBGene00001371	exl-1	F26H11.5	-0.438967	0.00144925	0.737663	O45405	NP_497000.1	Chloride intracellular channel exl-1 (Exc-4-like protein)	chloride transmembrane transport [GO:1902476]; regulation of ion transmembrane transport [GO:0034765]	chloride channel activity [GO:0005254]; voltage-gated ion channel activity [GO:0005244]		N.A.	N.A.	CANL, CANR, coelomocyte, intestine, muscle cell, neuron, PVDL, PVDR	germ line, germline precursor cell, intestine, muscle cell, NSM	exl-1 encodes a putative chloride intracellular channel (CLIC) paralogous to EXC-4; transgenic EXL-1 can partially rescue the exc-4(rh133) mutant phenotype when its expression is driven with an exc-4 promoter; EXL-1 is localized to lysosomes in intestinal cells and coelomocytes, endoplasmic reticulum in coelomocytes, Golgi apparatus in muscle and the neurons PVD and CAN, plasma membrane in muscle…
WBGene00007583	C14B4.2	C14B4.2	-0.439582	0.000357601	0.737348	G5ED06	NP_507767.2	Uncharacterized protein				N.A.	N.A.	N.A.	N.A.	RNA sequencing and microarray studies indicate that C14B4.2 is affected by Rotenone, Zidovudine, Cadmium, single-walled carbon nanotubes, and Colistin.
WBGene00022539	ZC190.5	ZC190.5	-0.442095	0.00405098	0.736065	O76699	NP_505234.2	Uncharacterized protein				N.A.	N.A.	N.A.	N.A.	Tiling array, RNA sequencing, and microarray studies indicate that ZC190.5 is affected by daf-12, emr-1, lem-2, clk-1, hsf-1, let-418, chd-3, and lin-22.
WBGene00002187	kgb-1	T07A9.3	-0.443424	4.15269e-05	0.735387	O44408	NP_499922.1	GLH-binding kinase 1 (EC 2.7.11.24)	activation of MAPK activity [GO:0000187]; cellular response to arsenite ion [GO:1903843]; cellular response to toxic substance [GO:0097237]; defense response to Gram-negative bacterium [GO:0050829]; determination of adult lifespan [GO:0008340]; JUN phosphorylation [GO:0007258]; male meiotic nuclear division [GO:0007140]; negative regulation of defense response to bacterium [GO:1900425]; negative …	ATP binding [GO:0005524]; DEAD/H-box RNA helicase binding [GO:0017151]; JUN kinase activity [GO:0004705]; protein C-terminus binding [GO:0008022]; protein kinase activity [GO:0004672]; protein serine/threonine kinase activity [GO:0004674]; RNA polymerase II repressing transcription factor binding [GO:0001103]		Bacillus thuringiensis toxin hypersensitive, cadmium hypersensitive, cadmium resistant, extended life span, pore forming toxin hypersensitive, sterile F1, transgene subcellular localization variant	cadmium hypersensitive, copper hypersensitive, endomitotic oocytes, fertilization defective hermaphrodite, gonad morphology variant, L1 arrest, metal response variant, oogenesis variant, pathogen susceptibility increased, pore forming toxin hypersensitive, sterile, transgene expression increased, tunicamycin hypersensitive	body wall musculature, dorsal-rectal ganglion neuron, embryonic cell, excretory cell, germ line, gonad, intestine, lumbar ganglion, male, nerve ring, pharynx, sensory neuron, spermatheca	ASER, intestine, OLL, PVD	kgb-1 encodes a serine/threonine kinase that is a member of the JNK (Jun-N-terminal kinase) subfamily of MAP (mitogen-activated protein)kinases; loss of kgb-1 activity results in temperature-sensitive sterility in hermaphrodites and males; in hermaphrodites, this sterility is associated with disorganized gonads and endomitotic oocytes that have likely failed to undergo oocyte maturation; in kgb-1…
WBGene00012907	cpt-1	Y46G5A.17	-0.443886	0.00122586	0.735152	Q9U2F2	NP_496721.2	Carnitine Palmitoyl Transferase		transferase activity, transferring acyl groups [GO:0016746]		N.A.	N.A.	body wall musculature, intestine, pharynx, rectal gland cell, reproductive system, vulval muscle	germ line, NSM	Y46G5A.17 is orthologous to the human gene SIMILAR TO CARNITINE PALMITOYLTRANSFERASE I, LIVER (CPT1A; OMIM:600528), which when mutated leads to disease.
WBGene00000742	col-169	T10E10.5	-0.444059	7.00789e-05	0.735063	Q86NE4	NP_872255.1	COLlagen		structural constituent of cuticle [GO:0042302]		locomotion variant, organism morphology variant, slow growth	N.A.	N.A.	AFD, germline precursor cell, hypodermis, ventral nerve cord	col-169 is an ortholog of human MARCO (macrophage receptor with collagenous structure); col-169 is a structural constituent of cuticle, based on protein domain information.
WBGene00021691	Y48G8AL.13	Y48G8AL.13	-0.44452	0.000955602	0.734829	Q9BL09	NP_490836.1, NP_001293436.2	Uncharacterized protein				N.A.	N.A.	N.A.	intestine	Y48G8AL.13 is an ortholog of human TLCD1 (TLC domain containing 1) and TLCD2 (TLC domain containing 2); RNA sequencing and microarray studies indicate that Y48G8AL.13 is affected by 1-methylnicotinamide, Rotenone, Resveratrol, Cadmium, Chlorpyrifos, Diazinon, Cry5B, Humic substances, and Paraquat; RNA sequencing and microarray studies indicate that Y48G8AL.13 is enriched in the intestine.
WBGene00001820	ham-1	F53B2.6	-0.445764	0.00271044	0.734195	G5EEC5	NP_502401.1	Uncharacterized protein	asymmetric neuroblast division [GO:0055059]; asymmetric protein localization involved in cell fate determination [GO:0045167]; cell fate determination [GO:0001709]; neuron migration [GO:0001764]; positive regulation of transcription by RNA polymerase II [GO:0045944]; protein localization to actomyosin contractile ring [GO:1990179]; spindle localization [GO:0051653]	transcriptional activator activity, RNA polymerase II transcription regulatory region sequence-specific DNA binding [GO:0001228]		sister cell division timing asynchrony reduced, transgene expression reduced	amphid phasmid morphology variant, antibody staining reduced, asymmetric cell division variant, cell fate transformation, egg laying defective, egg laying variant, HSN migration variant, lineage variant, neuron development variant, neuronal cell fate specification variant, phasmid morphology variant, Q lineage variant	anal region, body wall, developing hermaphrodite gonad, digestive tract, germ line, gonad, head, head ganglion, head neuron, hermaphrodite gonad, intestinal cell, intestine, midbody, nerve ring, neuroblast, somatic gonad, tail, vulva	DA neuron, gon_male_dtc anterior, gon_male_dtc posterior, PLM, VA neuron, Z1.p, Z4.a	ham-1 encodes a novel protein with a winged helix DNA-binding motif; ham-1 is required for the asymmetric divisions of several neuroblasts in the developing embryo and may influence their spindle position; ham-1 mutations also exhibit HSN motor neuron migration defects; HAM-1 interacts with itself in a yeast two-hybrid screen and observations suggest that its multimerization is required for its p…
WBGene00000991	dhs-28	M03A8.1	-0.446616	3.0963e-05	0.733762	Q21481	NP_509146.1	DeHydrogenases, Short chain	acyl-CoA metabolic process [GO:0006637]; ascaroside biosynthetic process [GO:1904070]; dauer entry [GO:0043053]; negative regulation of lipid storage [GO:0010888]; pheromone biosynthetic process [GO:0042811]; positive regulation of developmental growth [GO:0048639]; positive regulation of nematode larval development [GO:0061063]; response to pheromone [GO:0019236]; very long-chain fatty acid meta…	oxidoreductase activity [GO:0016491]		larval arrest, short defecation cycle, slow growth	ascaroside biosynthesis variant, dauer pheromone production defective, fat associated bodies increased, fat content variant, larval arrest, lipid composition variant, lipid hydrolysis regulation variant, organism starvation response variant, physiology variant, protein subcellular localization variant, response to food variant	hypodermis, intestine	ASER, germ line, intestine, pharyngeal muscle cell, Psub1	dhs-28 encodes an ortholog of human 17-BETA-HYDROXYSTEROID DEHYDROGENASE 4 (HSD17B4; OMIM:601860, mutated in D-bifunctional protein deficiency), which contains a C-terminal SCP-2 sterol transfer domain; the deletion allele dhs-28(ok450) is superficially wild-type.
WBGene00009165	gpx-1	F26E4.12	-0.447343	0.00239439	0.733392	O02621	NP_492598.1	Glutathione peroxidase 1 (EC 1.11.1.9)	innate immune response [GO:0045087]; oxidation-reduction process [GO:0055114]; regulation of peptide transport [GO:0090087]; response to oxidative stress [GO:0006979]	glutathione peroxidase activity [GO:0004602]; phospholipid-hydroperoxide glutathione peroxidase activity [GO:0047066]		brood size variant, embryonic lethal, fewer germ cells, foraging behavior variant, larval arrest, lipid metabolism variant, no oocytes, peptide uptake by intestinal cell increased, sperm morphology variant, transgene expression reduced	N.A.	head neuron, intestine, nervous system	AFD, ASER, intestine, neuron, pharynx	gpx-1 encodes a phospholipid hydroperoxide glutathione peroxidase; GPX-1 is predicted to catalyze the reduction of phospholipid hydroperoxides with glutathione; loss of gpx-1 activity via RNAi results in increased intestinal dipeptide uptake and increased cellular levels of the unsaturated aldehyde 4-hydroxynonenal (4-HNE), a lipid peroxidation product.
WBGene00008213	C49F8.1	C49F8.1	-0.447446	0.00267403	0.73334	Q18710	NP_510224.1	Uncharacterized protein				N.A.	N.A.	N.A.	AFD, CEM, FLP, HOB, IL2 neuron, pharynx, ray neuron type B, Z1, Z4	Microarray studies indicate that C49F8.1 is affected by Aldicarb, Selenium, Colistin, Sirolimus, and Triclosan; microarray and RNA sequencing studies indicate that C49F8.1 is enriched in the Z4, Z1, HOB, CEM, and pharynx and in the FLP, IL2, ray type B, and AFD neurons.
WBGene00007227	C01G6.5	C01G6.5	-0.448377	2.38525e-05	0.732867	P46012	NP_495977.1	Uncharacterized protein C01G6.5				embryonic lethal, fat content reduced	N.A.	N.A.	AFD, ASER, germ line, OLL, PVD	C01G6.5 is an ortholog of human TCF19 (transcription factor 19); microarray, RNA sequencing, and tiling array studies indicate that C01G6.5 is affected by cyc-1, aak-2, daf-12, jmjd-3.1, jmjd-1.2, mir-34, morc-1, emb-4, slr-2, fbf-1, gld-1, lin-54, alg-1, and mir-35; RNA sequencing and microarray studies indicate that C01G6.5 is affected by D-glucose, Zidovudine, Atrazine, Chlorpyrifos, Diazinon,…
WBGene00009797	F46G10.2	F46G10.2	-0.448538	0.00115747	0.732785	Q20477	NP_510218.2	Uncharacterized protein				N.A.	N.A.	N.A.	AFD, body wall musculature, FLP, male-specific, OLL, PVD	RNA sequencing and microarray studies indicate that F46G10.2 is affected by Rotenone, Zidovudine, Cry5B, Hydrolyzable Tannins, Humic substances, and Sirolimus; microarray and RNA sequencing studies indicate that F46G10.2 is enriched in the body wall musculature and male-specific tissues and in the PVD, OLL, FLP, and AFD neurons.
WBGene00020842	T27A3.6	T27A3.6	-0.449293	0.00192905	0.732402	P91500	NP_491763.1	Molybdopterin synthase catalytic subunit (EC 2.8.1.12) (Molybdenum cofactor synthesis protein 2 large subunit) (Molybdenum cofactor synthesis protein 2B) (MOCS2B)	molybdopterin cofactor biosynthetic process [GO:0032324]; Mo-molybdopterin cofactor biosynthetic process [GO:0006777]	molybdopterin synthase activity [GO:0030366]		dauer lifespan extended, protein aggregation variant, transgene subcellular localization variant	N.A.	N.A.	germ line, intestine	T27A3.6 is orthologous to the human gene Molybdenum cofactor synthesis gene 2 (MOCS2), which encodes molybdenum cofactor synthesis protein 2A and molybdenum cofactor synthesis protein 2B, which dimerize to form molybdopterin synthase.
WBGene00009094	F23H12.5	F23H12.5	-0.450849	0.000147229	0.731612	Q19764	NP_506096.1	Uncharacterized protein				larval arrest, maternal sterile, sick, slow growth, transgene expression increased	N.A.	N.A.	hypodermis, OLL, PVD	F23H12.5 is an ortholog of human SEMA3D (semaphorin 3D) and members of the SEMA (Semaphorins) family including SEMA6B; RNA sequencing and microarray studies indicate that F23H12.5 is affected by Ethanol, Methylmercury hydroxide, 1-methylnicotinamide, Manganese chloride, Sesamin, 4-bromodiphenyl ether, Zidovudine, Resveratrol, Quercetin, Colistin, Dafa#1, adsorbable organic bromine compounds, and …
WBGene00220171	Y48G10A.9	Y48G10A.9	-0.451543	0.00371841	0.73126	A0A061AL07	N.A.	ncRNA				N.A.	N.A.	N.A.	N.A.	RNA sequencing studies indicate that Y48G10A.9 is affected by prg-1, cep-1, sma-2, and sma-4.
WBGene00004880	smg-2	Y48G8AL.6	-0.45165	0.00258739	0.731206	O76512	NP_490829.1	Regulator of nonsense transcripts 1 (EC 3.6.4.-) (ATP-dependent helicase smg-2) (Nonsense mRNA reducing factor 1) (Up-frameshift suppressor 1 homolog)	embryonic genitalia morphogenesis [GO:0030538]; ncRNA metabolic process [GO:0034660]; nuclear mRNA surveillance of spliceosomal pre-mRNA splicing [GO:0071030]; nuclear-transcribed mRNA catabolic process [GO:0000956]; nuclear-transcribed mRNA catabolic process, nonsense-mediated decay [GO:0000184]; RNA interference [GO:0016246]	ATP binding [GO:0005524]; ATP-dependent RNA helicase activity [GO:0004004]; DNA binding [GO:0003677]; protein phosphatase 2A binding [GO:0051721]; RNA binding [GO:0003723]; zinc ion binding [GO:0008270]		embryonic lethal, gene expression variant, mRNA surveillance defective, nonsense mRNA accumulation, protruding vulva, RNAi resistant, somatic transgene silencing variant, transgene expression increased	bursa swollen, mRNA levels increased, mRNA surveillance defective, nonsense mRNA accumulation, organism pathogen response variant, protruding vulva, RNAi persistence variant	head neuron, intestinal cell, muscle cell, nervous system, neuron	ASER, germ line, OLL, PVD	smg-2 is an ortholog of human Upf1 (UPF1, RNA helicase and ATPase); smg-2 is involved in RNA interference, embryonic genitalia morphogenesis, ncRNA metabolic process and nuclear mRNA surveillance of spliceosomal pre-mRNA splicing; smg-2 exhibits protein phosphatase 2A binding activity and is predicted to have ATP binding activity, DNA binding activity, helicase activity, and zinc ion binding acti…
WBGene00019464	K07B1.4	K07B1.4	-0.453112	0.00131237	0.730466	O01881	NP_505413.1, NP_872180.1	Uncharacterized protein		transferase activity, transferring acyl groups other than amino-acyl groups [GO:0016747]		embryonic lethal	N.A.	body wall musculature, intestine, rectal gland cell	germ line, intestine, muscle cell	K07B1.4 is an ortholog of members of the human DGAT2 (Diacylglycerol O-acyltransferase 2) family including DGAT2; K07B1.4 is predicted to have transferase activity, transferring acyl groups other than amino-acyl groups, based on protein domain information; K07B1.4 is expressed in the intestine, rectal gland cell, and the body wall musculature.
WBGene00020562	T19C3.4	T19C3.4	-0.454568	4.79841e-05	0.729729	Q10010	NP_497221.1	Uncharacterized protein T19C3.4				N.A.	N.A.	N.A.	ASER, muscle cell, PLM	T19C3.4 is an ortholog of members of the human REEP (Receptor accessory proteins) family including REEP2; microarray, tiling array, and RNA sequencing studies indicate that T19C3.4 is affected by cyc-1, daf-12, cox-5B, jmjd-3.1, jmjd-1.2, hlh-30, mir-34, pgl-1, pgl-3, glh-4, glh-1, vit-2, emb-4, sma-2, sma-4, and alg-1; RNA sequencing and microarray studies indicate that T19C3.4 is affected by Cr…
WBGene00003411	mrp-5	F14F4.3	-0.455072	2.76139e-05	0.729474	G5EE72	NP_510479.1	Uncharacterized protein	transmembrane transport [GO:0055085]	ATPase activity, coupled to transmembrane movement of substances [GO:0042626]; ATP binding [GO:0005524]		aldicarb resistant, blistered, clear, dauer arrest variant, extended life span, larval lethal, slow growth, sluggish	N.A.	anal depressor muscle, anal sphincter muscle, body wall musculature, Cell, hypodermis, intestinal muscle, intestine, muscle cell, neuron, pharynx	body wall musculature, dorsal nerve cord, intestine, lateral nerve cord, nerve ring, OLL, pharynx, PVD, somatic neuron, spermatheca, tail neuron, ventral nerve cord, vulva, vulval muscle	The mrp-5 gene encodes a homolog of the human gene CFTR, which when mutated leads to cystic fibrosis (OMIM:219700).
WBGene00016425	C34H4.2	C34H4.2	-0.456646	9.98941e-05	0.728678	O45143	NP_500096.2	Uncharacterized protein	innate immune response [GO:0045087]			N.A.	N.A.	N.A.	intestine, OLL, PVD	Microarray and RNA sequencing studies indicate that C34H4.2 is affected by Heme, Hydrogen sulfide, 1-methylnicotinamide, Mianserin, D-glucopyranose, D-glucose, 4-bromodiphenyl ether, Atrazine, Chlorpyrifos, Diazinon, Albendazole, Quercetin, Hydrolyzable Tannins, Humic substances, R24, Paraquat, Colistin, Dafa#1, adsorbable organic bromine compounds, and Sirolimus; microarray, tiling array, and RN…
WBGene00006641	tsp-15	F53B6.1	-0.458698	0.00151939	0.727643	Q9XVM9	NP_492404.1	Tetraspanin-15	cell surface receptor signaling pathway [GO:0007166]; cuticle development involved in collagen and cuticulin-based cuticle molting cycle [GO:0042338]; skin epidermis development [GO:0098773]			blistered, cell membrane morphology variant, dumpy, larval arrest, organism morphology variant	blistered, dumpy, lethal, sterile	body wall musculature, hyp7 syncytium, pharynx, seam cell, vulva	germline precursor cell, muscle cell	tsp-15 is an ortholog of human CD63 (CD63 molecule); tsp-15 functions in cuticle development involved in collagen and cuticulin-based cuticle the molting cycle and is involved in skin epidermis development; tsp-15 is expressed in the pharynx, hyp7 syncytium, seam cell, body wall musculature, and the vulva.
WBGene00006351	sur-5	K03A1.5	-0.460356	0.000243785	0.726807	Q21166	NP_509229.1	Acetoacetyl-CoA synthetase (EC 6.2.1.16) (Suppressor of activated let-60 Ras protein 5)	fatty acid metabolic process [GO:0006631]	acetoacetate-CoA ligase activity [GO:0030729]; ATP binding [GO:0005524]		extra cell division postembryonic	N.A.	body wall musculature, excretory cell, gonad, hyp1, hyp2, hyp4, hyp5, hyp6, hyp7 syncytium, hyp8, hyp9, hyp10, hyp11, hyp12, neuron, P1.p, P2.p, P3.p hermaphrodite, P4.p hermaphrodite, P5.p hermaphrodite, P6.p hermaphrodite, P7.p hermaphrodite, P8.p hermaphrodite, P9.p, P10.p, P11.p, P12.p, pharynx, somatic cell, uterine toroidal epithelial cell	body wall muscle cell, intestine, neuron	sur-5 encodes a protein with high similarity to H. sapiens Acetoacetyl-coenzyme A synthetase; sur-5 negatively regulates let-60 during vulval induction, based on genetic analysis, and genetically synergises with lin-45 with respect to larval death, uncoordinated movement and egg-laying defects; sur-5 is strongly expressed in most cells of C. elegans, including the VPCs, and is localized primarily…
WBGene00012464	arrd-7	Y17G7B.11	-0.460481	0.00130351	0.726744	Q9XXI4	NP_496567.2	ARRestin Domain protein	signal transduction [GO:0007165]			N.A.	N.A.	N.A.	intestine, OLL, pharyngeal muscle cell, PVD	arrd-7 is an ortholog of human ARRDC1 (arrestin domain containing 1); RNA sequencing and microarray studies indicate that arrd-7 is affected by Zidovudine, Resveratrol, Atrazine, Cry5B, Humic substances, Dafa#1, and Ag nanoparticles; microarray, tiling array, and RNA sequencing studies indicate that arrd-7 is enriched in the intestine and pharyngeal muscle cell and in the PVD and OLL neurons.
WBGene00006861	cal-5	C24H10.5	-0.460688	1.4175e-05	0.72664	Q18136	NP_508864.2	CALmodulin related genes		calcium ion binding [GO:0005509]		N.A.	N.A.	N.A.	germ line, hypodermis	uvt-2 encodes a protein that contains four EF-hand calcium binding motifs with similarity to human calmodulin; mRNA weakly expressed in L1 through L4 larval stages and in the adult hermaphrodite.
WBGene00001366	exc-5	C33D9.1	-0.461924	0.000285155	0.726017	X5LV34	NP_001023038.1, NP_001023039.1, NP_001294028.1, NP_001294029.1	Putative GDP-GTP exchange factor (Rho guanine nucleotide exchange factor FGD-1)	cell morphogenesis [GO:0000902]; epithelial cell development [GO:0002064]; positive regulation of actin filament binding [GO:1904531]; regulation of Rho protein signal transduction [GO:0035023]; regulation of tube size [GO:0035150]	guanyl-nucleotide exchange factor activity [GO:0005085]; metal ion binding [GO:0046872]; Rho guanyl-nucleotide exchange factor activity [GO:0005089]		locomotion variant, organism morphology variant	endosome localization variant, excretory canal morphology variant, lethal, sterile	excretory cell, head neuron, pharyngeal muscle cell, rectal epithelium, spermatheca, tail neuron, uterine toroidal epithelial cell	excretory cell, GABAergic neuron, muscle cell, neuron	exc-5 encodes a protein orthologous to human FGD1 which is a guanine nucleotide exchange factor (GEF) for the Rho GTPase, Cdc-42; exc-5 is involved in the morphogenesis and structural organization of the excretory cell and is predominantly expressed in the excretory cell during development.
WBGene00003389	mog-1	K03H1.2	-0.464205	3.99502e-05	0.724871	P34498	NP_499212.1	Probable pre-mRNA-splicing factor ATP-dependent RNA helicase mog-1 (EC 3.6.4.13) (Masculinization of germline protein 1) (Sex determination protein mog-1)	feminization of hermaphroditic germ-line [GO:0040022]; mRNA splicing, via spliceosome [GO:0000398]	ATP binding [GO:0005524]; ATP-dependent RNA helicase activity [GO:0004004]; RNA binding [GO:0003723]		cell proliferation increased, dumpy, embryonic lethal, excess intestinal cells, germ cell development variant, larval lethal, oocytes disorganized, organism morphology variant, pattern of transgene expression variant, receptor mediated endocytosis defective, tumorous germline	hermaphrodite self sterile, masculinization of germline, sperm excess	Cell	germ line	The mog-1 gene encodes a DEAH helicase orthologous to the Drosophila CG1375/1405, the human PRP16, and the S. cerevisiae PRP16 proteins.
WBGene00013639	Y105C5A.15	Y105C5A.15	-0.464379	0.00203192	0.724783	A0A078BS51	NP_001255876.1, NP_001294100.1, NP_001294099.1, NP_001255877.1	Uncharacterized protein		DNA binding [GO:0003677]		N.A.	N.A.	pharynx	body wall musculature, DA neuron, dopaminergic neuron, I5 neuron, intestine, neuron, NSM, OLL, PVD, retrovesicular ganglion, SAB, VA neuron	Y105C5A.15 is expressed in the pharynx.
WBGene00000003	aat-2	F07C3.7	-0.465388	0.00138352	0.724276	Q19151	NP_505394.2	Amino Acid Transporter		antiporter activity [GO:0015297]; L-amino acid transmembrane transporter activity [GO:0015179]		N.A.	N.A.	N.A.	AFD, body wall muscle cell, GABAergic neuron, germ line, muscle cell	aat-2 encodes a predicted amino acid transporter catalytic subunit; when co-expressed in Xenopus oocytes with a glycoprotein subunit, however, AAT-2 is not able to induce amino acid uptake.
WBGene00003517	nac-1	F31F6.6	-0.465776	0.000482383	0.724082	Q93655	NP_510473.2	Sodium-dependent low-affinity dicarboxylate transporter 1 (Na(+)/dicarboxylate cotransporter 1) (NaDC-1) (ceNaDC1)	succinate transport [GO:0015744]	citrate transmembrane transporter activity [GO:0015137]; low-affinity sodium:dicarboxylate symporter activity [GO:0015361]; succinate transmembrane transporter activity [GO:0015141]		N.A.	N.A.	alimentary system	hypodermis	nac-1 encodes a low-affinity sodium-coupled dicarboxylate transporter homologous to INDY in D. melanogaster and to mammalian NaDC1 and NaDC3; nac-1 is expressed in the intestine, in larvae and adults.
WBGene00007421	C07H4.1	C07H4.1	-0.466745	0.00303754	0.723595	A0A078BS54	NP_001293497.1, NP_495939.1	Uncharacterized protein				N.A.	N.A.	N.A.	dopaminergic neuron, intestine, muscle cell	RNA sequencing and microarray studies indicate that C07H4.1 is affected by Rotenone, Cry5B, Zidovudine, Atrazine, Humic substances, and Sirolimus; tiling array, RNA sequencing, and microarray studies indicate that C07H4.1 is enriched in the muscle cell and intestine and in the dopaminergic neurons.
WBGene00010827	M02B1.2	M02B1.2	-0.467916	0.00234816	0.723008	Q93891	NP_502446.2	Uncharacterized protein				N.A.	N.A.	AIYL, AIYR	AFD, CEM, HOB, hypodermis, IL2 neuron, ray neuron type B	M02B1.2 is expressed in certain interneurons.
WBGene00003561	ncr-1	F02E8.6	-0.468282	0.000428025	0.722825	Q19127	NP_508771.1	NPC intracellular cholesterol transporter 1 homolog 1 (Niemann-Pick C1 protein homolog 1)	cholesterol homeostasis [GO:0042632]; cholesterol transport [GO:0030301]; dauer larval development [GO:0040024]; positive regulation of growth rate [GO:0040010]; regulation of oviposition [GO:0046662]			embryonic lethal, reduced brood size, transgene subcellular localization variant	aldicarb hypersensitive, levamisole hypersensitive, pheromone induced dauer formation enhanced, reduced brood size	ADAL, ADAR, ADEL, ADER, AIYL, AIYR, ASEL, ASER, ASGL, ASGR, AWCL, AWCR, excretory canal, excretory cell, FLPL, FLPR, gonadal sheath cell, hypodermis, I6 neuron, IL2DL, IL2DR, IL2L, IL2R, IL2VL, IL2VR, intestine, PHAL, PHAR, pharyngeal muscle cell, pharynx, PHBL, PHBR, PHCL, PHCR, rectal epithelial cell, rectal epithelium, RICL, RICR, RID, RIML, RIMR, seam cell, spermatheca, uterus, XXXL, XXXR	body wall musculature, intestine	ncr-1 encodes a large transmembrane glycoprotein with a patched-like domain that is orthologous to human NPC1; NCR-1 and NPC1 are eukaryotic members of the resistance-nodulation-division (RND) family of membrane permeases, and have a putative sterol-sensing domain; by homology, NCR-1 is predicted to function in intracellular cholesterol and glycolipid trafficking; in C. elegans, NCR-1 is required…
WBGene00013243	Y56A3A.31	Y56A3A.31	-0.470364	0.000316622	0.721782	A0A1C3NSQ4	NP_001317883.1, NP_001317884.1, NP_499563.1	Uncharacterized protein				N.A.	N.A.	N.A.	ASER, intestine	Y56A3A.31 is an ortholog of human C7orf26 (chromosome 7 open reading frame 26); microarray, tiling array, and RNA sequencing studies indicate that Y56A3A.31 is affected by cyc-1, hpl-2, eat-2, gld-4, daf-16, npr-1, cox-5B, jmjd-3.1, jmjd-1.2, mir-34, sma-2, sma-4, lin-35, dcr-1, slr-2, and spg-7; RNA sequencing and microarray studies indicate that Y56A3A.31 is affected by Rotenone, Fluoranthene, …
WBGene00018986	cdo-1	F56F10.3	-0.470521	0.00142103	0.721704	Q20893	NP_508168.1	Cysteine dioxygenase 1 (CDO) (EC 1.13.11.20)	taurine biosynthetic process [GO:0042412]	cysteine dioxygenase activity [GO:0017172]; iron ion binding [GO:0005506]		transgene expression increased	N.A.	hypodermis, intestine, tail	germline precursor cell, hypodermis, intestine	cdo-1 encodes the C. elegans cysteine dioxygenase ortholog; by homology to mammalian enzymes, CDO-1 is predicted to function in cysteine catabolism by catalyzing the oxidation of cysteine to cysteine sulfanate.
WBGene00008492	F01D5.1	F01D5.1	-0.474403	0.00327382	0.719765	Q9XVB1	NP_496932.1	Uncharacterized protein	innate immune response [GO:0045087]			N.A.	N.A.	N.A.	intestine, OLL, PVD	F01D5.1 is involved in innate immune response[HEP].
WBGene00002889	let-765	F20H11.2	-0.474454	9.56664e-06	0.719739	O01737	NP_498455.2	Notch signaling pathway homolog-1	nematode male tail tip morphogenesis [GO:0045138]; positive regulation of cell fate specification [GO:0042660]; positive regulation of Ras protein signal transduction [GO:0046579]; regulation of transcription, DNA-templated [GO:0006355]; vulval cell fate specification [GO:0072327]			distal tip cell migration variant, embryonic lethal, exploded through vulva, fat content reduced, germ cell compartment expansion variant, germ cell compartment morphology variant, germ cell compartment multinucleate, germ cell partition morphology variant, germline nuclear positioning variant, larval lethal, lethal, maternal sterile, nuclear fallout, oocyte morphology variant, oocyte number decr…	B lineage variant, early larval lethal, L2 arrest, lineage variant, mid larval lethal	anterior ganglion, excretory secretory system, gonad, hyp7, hypodermis, intestine, neuron, P3.p hermaphrodite, P4.p hermaphrodite, P5.p hermaphrodite, P5.pa, P5.paa, P5.pap, P5.pp, P5.ppa, P6.p hermaphrodite, P6.pa, P6.paa, P6.pap, P6.pp, P6.ppa, P6.ppp, P7.p hermaphrodite, P7.pa, P7.pap, P7.pp, P7.ppa, P7.ppp, P8.p hermaphrodite, vulval cell	germ line	let-765 is an ortholog of human SBNO1 (strawberry notch 1) and SBNO2 (strawberry notch 2); let-765 is involved in nematode male tail tip morphogenesis, positive regulation of Ras protein signal transduction, positive regulation of cell fate specification and vulval cell fate specification; let-765 is localized to the nucleus.
WBGene00017427	acp-5	F13D11.1	-0.475536	0.00111228	0.7192	Q19390	NP_508977.1	ACid Phosphatase family				fat content reduced, lysosome-related organelle morphology variant	N.A.	N.A.	AFD, FLP, intestine, OLL, PVD	acp-5 is an ortholog of human ACPT (acid phosphatase, testicular), ACPP (acid phosphatase, prostate) and ACP2 (acid phosphatase 2, lysosomal); RNA sequencing and microarray studies indicate that acp-5 is affected by Bisphenol A, 4-bromodiphenyl ether, Zidovudine, Atrazine, Cry5B, Chlorpyrifos, Diazinon, Quercetin, Hydrolyzable Tannins, Humic substances, R24, and Paraquat; microarray, tiling array…
WBGene00003056	lon-2	C39E6.1	-0.476014	0.00168356	0.718961	Q18530	NP_508812.3	LONg	negative regulation of multicellular organism growth [GO:0040015]; negative regulation of transforming growth factor beta receptor signaling pathway [GO:0030512]; regulation of cell migration [GO:0030334]; regulation of mesodermal cell fate specification [GO:0042661]; transforming growth factor beta receptor signaling pathway involved in regulation of multicellular organism growth [GO:1901048]	growth factor binding [GO:0019838]		dendrite development variant, embryonic lethal, larval arrest, locomotion variant, long, multivulva, reduced brood size, small	alae morphology variant, amplitude of sinusoidal movement variant, annulae morphology variant, backward locomotion variant, backward point velocity increased, body posture amplitude increased, body posture wavelength decreased, bursa elongated, coiling frequency increased, embryonic lethal, forward locomotion variant, forward point velocity increased, frequency of body bend variant, head bend ang…	hyp1, hyp2, hyp3, hyp4, hyp5, hyp6, hyp8, hyp9, hyp10, hyp11, hyp12, hypodermis, intestine	DA neuron, I5 neuron, intestine, neuron, NSM, retrovesicular ganglion, SAB, VA neuron	lon-2 encodes a member of the glypican family of heparan sulfate proteoglycans; during development, lon-2 activity is required in the hypodermis for negative regulation of the DBL-1/BMP signaling pathway that regulates body length; genetic analyses indicate that lon-2 functions upstream of dbl-1, and in vitro studies show that LON-2 can bind mammalian BMP2, suggesting that LON-2 may directly inte…
WBGene00010755	vglu-2	K10G9.1	-0.476054	2.17953e-05	0.718941	G5EEK1	NP_499276.1	Vesicular GLUtamate transporter	anion transport [GO:0006820]; transmembrane transport [GO:0055085]	transmembrane transporter activity [GO:0022857]		N.A.	N.A.	N.A.	germline precursor cell, hypodermis	vglu-2 is an ortholog of human SLC17A8 (solute carrier family 17 member 8), SLC17A6 (solute carrier family 17 member 6) and SLC17A7 (solute carrier family 17 member 7); RNA sequencing and microarray studies indicate that vglu-2 is affected by D-glucose, Bisphenol A, Zidovudine, Chlorpyrifos, Diazinon, Hydrolyzable Tannins, Humic substances, and Paraquat; tiling array and RNA sequencing studies in…
WBGene00001674	gpa-12	F18G5.3	-0.476441	3.07769e-05	0.718749	Q19572	NP_509557.1	Guanine nucleotide-binding protein alpha-12 subunit	adenylate cyclase-modulating G-protein coupled receptor signaling pathway [GO:0007188]; defense response to fungus [GO:0050832]; positive regulation of antimicrobial peptide production [GO:0002225]; positive regulation of transcription from RNA polymerase II promoter involved in defense response to fungus [GO:1901244]; Rho protein signal transduction [GO:0007266]	D5 dopamine receptor binding [GO:0031752]; G-protein beta/gamma-subunit complex binding [GO:0031683]; GTPase activity [GO:0003924]; GTP binding [GO:0005525]; metal ion binding [GO:0046872]		egg laying variant, embryonic lethal, locomotion variant, mechanosensation variant, oogenesis variant	amplitude of sinusoidal movement variant, antimicrobial gene expression variant, axon regeneration defective, backward point velocity increased, body posture amplitude variant, body posture wavelength decreased, fat, forward point velocity increased, frequency of body bend variant, head bend angle increased, nose movement increased, path curvature variant, response to injury variant, tail bend an…	excretory cell, head neuron, hypodermis, interneuron, intestine, muscle cell, nerve ring, pharyngeal muscle cell, pharynx, tail neuron, ventral cord neuron	AFD, PLM	gpa-12 encodes a member of the G protein alpha subunit family of heterotrimeric GTPases that is orthologous to members of the mammalian Galpha G12/G13 family; GPA-12 activity is required for antifungal innate immunity and genetic analyses indicate that GPA-12 functions upstream of phospholipase Cs PLC-3 and EGL-8 as well as the TPA-1 protein kinase C in this process; genetic analyses also suggest…
WBGene00003400	dapk-1	K12C11.4	-0.47792	3.20726e-06	0.718012	O44997	NP_001293417.1, NP_001293416.1, NP_001293415.1, NP_490840.2	DAP (Death-Associated Protein) Kinase homolog	apoptotic process [GO:0006915]; signal transduction [GO:0007165]	protein serine/threonine kinase activity [GO:0004674]		C lineage variant, embryonic lethal, failure to hatch, gene expression variant, protein subcellular localization variant	antimicrobial gene expression variant, apoptosis variant, cuticle fragile, cuticle morphology variant, cuticle physiology variant, epithelial development variant, morphology variant, pathogen susceptibility increased	body wall musculature, hypodermis	N.A.	dapk-1 encodes the C. elegans ortholog of the tumor suppressor death-associated protein (DAP) kinase; dapk-1 functions in epidermal cells to regulate epithelial damage responses; specifically dapk-1 acts as a negative regulator of barrier repair and the TIR-1-mediated innate immune response to wounding; dapk-1 also functions downstream of, or in parallel to, muscarinic signaling in the regulation…
WBGene00016034	C24A3.4	C24A3.4	-0.478372	0.00234673	0.717787	Q18122	NP_509517.2	Uncharacterized protein		catalytic activity [GO:0003824]		N.A.	N.A.	N.A.	intestine	C24A3.4 is an ortholog of human AMACR (alpha-methylacyl-CoA racemase); C24A3.4 is predicted to have catalytic activity, based on protein domain information.
WBGene00185014	F17C8.9	F17C8.9	-0.478691	0.000678492	0.717629	C0P278	NP_001254920.1	Uncharacterized protein	NAD biosynthetic process [GO:0009435]; NADP catabolic process [GO:0006742]	aspartate dehydrogenase activity [GO:0033735]; NADP binding [GO:0050661]		N.A.	N.A.	N.A.	N.A.	F17C8.9 is an ortholog of human ASPDH (aspartate dehydrogenase domain containing); F17C8.9 is predicted to have NADP binding activity and aspartate dehydrogenase activity, based on protein domain information.
WBGene00018566	F47E1.2	F47E1.2	-0.478867	0.000574389	0.717541	Q20538	NP_509531.1	Solute carrier organic anion transporter family member	sodium-independent organic anion transport [GO:0043252]	sodium-independent organic anion transmembrane transporter activity [GO:0015347]		N.A.	N.A.	N.A.	dopaminergic neuron, excretory cell, hypodermis, intestine	F47E1.2 is an ortholog of human SLCO3A1 (solute carrier organic anion transporter family member 3A1); F47E1.2 is predicted to have transporter activity, based on protein domain information.
WBGene00016504	C37C3.12	C37C3.12	-0.479723	0.0035824	0.717115	Q8I7H8	NP_872190.1	Uncharacterized protein	protein import into nucleus [GO:0006606]			N.A.	N.A.	N.A.	N.A.	C37C3.12 is an ortholog of human PTTG1IP (pituitary tumor-transforming 1 interacting protein); microarray and RNA sequencing studies indicate that C37C3.12 is affected by cyc-1, wdr-23, eat-2, tatn-1, clk-1, jmjd-3.1, let-418, dpy-21, hlh-30, mir-34, pgl-1, pgl-3, glh-4, glh-1, alg-1, alg-2, sma-2, sma-4, and cox-5B; RNA sequencing studies indicate that C37C3.12 is affected by Rotenone and Cry5B.
WBGene00007177	oac-1	B0399.2	-0.482102	0.00318145	0.715934	G5EC12	NP_507799.3	O-ACyltransferase homolog	cellular polysaccharide biosynthetic process [GO:0033692]	transferase activity, transferring acyl groups other than amino-acyl groups [GO:0016747]		N.A.	N.A.	N.A.	AFD, ASER, PLM	oac-1 is predicted to have transferase activity, transferring acyl groups other than amino-acyl groups, based on protein domain information.
WBGene00017971	F32A5.8	F32A5.8	-0.483003	0.00217192	0.715487	Q95QH4	NP_495516.2	Uncharacterized protein		oxidoreductase activity [GO:0016491]		N.A.	N.A.	N.A.	intestine, pharyngeal muscle cell, PLM	F32A5.8 is an ortholog of human Wwox (WW domain containing oxidoreductase); RNA sequencing and microarray studies indicate that F32A5.8 is affected by Rotenone, Cry5B, Hydrolyzable Tannins, Humic substances, Paraquat, and Sirolimus; tiling array and RNA sequencing studies indicate that F32A5.8 is enriched in the intestine and pharyngeal muscle cell and in the PLM neurons.
WBGene00002146	ipp-5	C09B8.1	-0.486769	0.000135851	0.713621	Q17848	NP_509008.2	Inositol Polyphosphate 5-Phosphatase	phosphatidylinositol dephosphorylation [GO:0046856]	hydrolase activity [GO:0016787]		brood size variant, organism development variant	embryonic lethal, ovulation variant, RNAi resistant, RNAi response variant	spermatheca	AVA, AVD, AVE, AVG, body wall musculature, dorsal nerve cord, intestine, lateral nerve cord, nerve ring, NSM, pharynx, PVC, RIM, somatic neuron, tail neuron, ventral nerve cord, vulval muscle	ipp-5 encodes a type I inositol 5-phosphatase homolog; ipp-5 acts downstream of let-23 to negatively regulate IP3 signaling and is involved in spermathecal contractions during ovulation; an ipp-5::gfp transcriptional reporter is expressed in the adult distal spermatheca and weakly in the proximal sheath.
WBGene00022382	Y94H6A.10	Y94H6A.10	-0.488582	0.00187053	0.712725	Q75MI6	NP_001023589.1	Uncharacterized protein				N.A.	N.A.	N.A.	AFD, intestine, muscle cell, PLM	RNA sequencing and microarray studies indicate that Y94H6A.10 is affected by 1-methylnicotinamide, Tunicamycin, D-glucopyranose, D-glucose, Cry5B, Quercetin, Humic substances, R24, Colistin, adsorbable organic bromine compounds, and Sirolimus; RNA sequencing, proteomic, and microarray studies indicate that Y94H6A.10 is enriched in the intestine and muscle cell and in the AFD and PLM neurons.
WBGene00169589	21ur-14652	C43F9.13	-0.48863	0.00142606	0.712702	B6GUQ2	N.A.	21U RNA				N.A.	N.A.	N.A.	N.A.
WBGene00019116	nhr-143	F59E11.11	-0.490123	0.00361649	0.711964	O16753	NP_505317.2	Nuclear Hormone Receptor family	transcription, DNA-templated [GO:0006351]	DNA binding transcription factor activity [GO:0003700]; sequence-specific DNA binding [GO:0043565]; zinc ion binding [GO:0008270]		N.A.	N.A.	N.A.	dopaminergic neuron, intestine, neuron	nhr-143 is predicted to have DNA-binding transcription factor activity, sequence-specific DNA binding activity, and zinc ion binding activity, based on protein domain information.
WBGene00022538	ZC190.4	ZC190.4	-0.492647	0.000619903	0.71072	O76699	NP_505233.2	Uncharacterized protein	negative regulation of translation [GO:0017148]; nuclear-transcribed mRNA poly(A) tail shortening [GO:0000289]; regulation of mRNA stability [GO:0043488]	mRNA binding [GO:0003729]; translation repressor activity [GO:0030371]		N.A.	N.A.	N.A.	AFD, body wall musculature, intestine, muscle cell, OLL, PVD	ZC190.4 is an ortholog of human SAMD4A (sterile alpha motif domain containing 4A) and SAMD4B (sterile alpha motif domain containing 4B); RNA sequencing and microarray studies indicate that ZC190.4 is affected by Zidovudine, Fluoranthene, Diazinon, and Sirolimus; tiling array, RNA sequencing, and microarray studies indicate that ZC190.4 is enriched in the muscle cell, intestine, and body wall musc…
WBGene00006493	tag-147	R09A8.3	-0.495812	6.85929e-06	0.709163	Q21854	NP_510109.1	Influenza Virus NS1a (A) binding protein homolog	protein ubiquitination [GO:0016567]			N.A.	N.A.	N.A.	AFD, body wall musculature, intestine, NSM, pharynx	ivns-1 is an ortholog of human IVNS1ABP (influenza virus NS1A binding protein); microarray studies indicate that ivns-1 is affected by Chlorpyrifos, Diazinon, Quercetin, Humic substances, Colistin, and Sirolimus; chronogram analysis and RNA sequencing studies indicate that ivns-1 is enriched in the intestine, body wall musculature, and pharynx and in the NSM and AFD neurons.
WBGene00015841	C16C8.2	C16C8.2	-0.4978	0.00197017	0.708186	P91060	NP_494540.1	ShK domain and PerOxidase domain containing protein	response to oxidative stress [GO:0006979]	heme binding [GO:0020037]; peroxidase activity [GO:0004601]		N.A.	N.A.	N.A.	germline precursor cell, hypodermis	skpo-2 is an ortholog of human TPO (thyroid peroxidase), MPO (myeloperoxidase) and LPO (lactoperoxidase) and members of the I-set domain containing family including PXDNL; skpo-2 is predicted to have heme binding activity and peroxidase activity, based on protein domain information.
WBGene00006635	tsp-9	C25G6.2	-0.499165	0.00071111	0.707516	Q18177	NP_508232.1	Tetraspanin	cell surface receptor signaling pathway [GO:0007166]			N.A.	N.A.	N.A.	intestine, pharynx	tsp-9 is an ortholog of human TSPAN8 (tetraspanin 8); microarray and RNA sequencing studies indicate that tsp-9 is affected by cyc-1, jmjd-3.1, jmjd-1.2, unc-39, pgl-1, pgl-3, glh-4, glh-1, vgln-1, fog-2, emb-4, sma-2, sma-4, sir-2.1, dcr-1, slr-2, alg-1, tdp-1, and nuo-6; microarray studies indicate that tsp-9 is affected by Cry5B and Paraquat; microarray, RNA sequencing, and proteomic studies i…
WBGene00020398	T10B11.2	T10B11.2	-0.501193	2.27684e-06	0.706522	Q9TZI1	NP_491977.1	Ceramide kinase 1 (EC 2.7.1.138)	sphingolipid metabolic process [GO:0006665]	ATP binding [GO:0005524]; ceramide kinase activity [GO:0001729]; dihydroceramide kinase activity [GO:0102773]; NAD+ kinase activity [GO:0003951]		N.A.	N.A.	head neuron, hypodermis, intestine, nervous system, reproductive system, spermatheca, tail neuron, vulval muscle	body wall muscle cell, body wall musculature, coelomocyte, dorsal nerve cord, germ line, hypodermis, intestine, lateral nerve cord, nerve ring, neuron, pharynx, somatic neuron, tail neuron, ventral nerve cord, vulval muscle	cerk-1 is an ortholog of human Cerk (ceramide kinase); cerk-1 is predicted to have NAD+ kinase activity, based on protein domain information; cerk-1 is expressed in the hypodermis, nervous system, reproductive system, and the intestine.
WBGene00022077	vamp-7	Y69A2AR.6	-0.501215	0.000514684	0.706512	Q95XH1	NP_500232.3	VAMP (Vesicle Associated Membrane Protein) homolog	exocytosis [GO:0006887]; vesicle fusion [GO:0006906]	SNAP receptor activity [GO:0005484]; SNARE binding [GO:0000149]		N.A.	N.A.	N.A.	germ line	vamp-7 is an ortholog of human VAMP8 (vesicle associated membrane protein 8); microarray, tiling array, and RNA sequencing studies indicate that vamp-7 is affected by cyc-1, daf-12, gld-2, mir-34, emb-4, lin-22, and daf-2; RNA sequencing studies indicate that vamp-7 is affected by Rotenone; RNA sequencing studies indicate that vamp-7 is enriched in the germ line and germline precursor cell.
WBGene00014036	ZK643.5	ZK643.5	-0.503588	4.12055e-05	0.705351	P30651	NP_498979.1	Uncharacterized protein ZK643.5				no induction of antimicrobial peptide expression after infection	N.A.	head ganglion, lateral ganglion, tail neuron, ventral ganglion, ventral nerve cord	germ line	ZK643.5 is expressed in the head ganglion, ventral nerve cord, and the tail neurons.
WBGene00019979	R09B5.11	R09B5.11	-0.506316	0.00141753	0.704018	O44616	NP_503413.2	Facilitated glucose transporter homolog		transmembrane transporter activity [GO:0022857]		cleavage furrow initiation defective early emb, germ cell morphology variant, reduced brood size	N.A.	seam cell	dopaminergic neuron, germline precursor cell, hypodermis, OLL, PVD	R09B5.11 is an ortholog of members of the human SLC (Solute carriers) family including SLC2A14; R09B5.11 is predicted to have transmembrane transporter activity, based on protein domain information; R09B5.11 is expressed in the seam cell.
WBGene00012494	nhr-232	Y22F5A.1	-0.506703	0.00154801	0.703829	O62412	NP_505639.2	Nuclear Hormone Receptor family	transcription, DNA-templated [GO:0006351]	DNA binding transcription factor activity [GO:0003700]; sequence-specific DNA binding [GO:0043565]; zinc ion binding [GO:0008270]		N.A.	N.A.	N.A.	AVA, intestine	nhr-232 is predicted to have DNA-binding transcription factor activity, sequence-specific DNA binding activity, and zinc ion binding activity, based on protein domain information.
WBGene00009947	F52H3.5	F52H3.5	-0.507481	0.000143161	0.703449	Q20683	NP_496168.1	Tetratricopeptide repeat protein 36 (TPR repeat protein 36)				organism osmotic stress response variant, transgene expression increased	N.A.	hypodermis, intestine, Pharyngeal gland cell, pharynx	N.A.	ttc-36 is an ortholog of human TTC36 (tetratricopeptide repeat domain 36); ttc-36 is expressed in the pharynx, hypodermis, and the intestine.
WBGene00009918	F52A8.5	F52A8.5	-0.510359	4.07128e-05	0.702048	Q20634	NP_492075.1	Glycine cleavage system H protein	glycine decarboxylation via glycine cleavage system [GO:0019464]			embryonic lethal, protein metabolism variant, transgene expression increased	N.A.	N.A.	germ line, intestine, NSM	F52A8.5 is orthologous to the human gene GLYCINE CLEAVAGE SYSTEM PROTEIN H (GCSH; OMIM:238330), which when mutated leads to glycine encephalopathy.
WBGene00017861	F27D9.2	F27D9.2	-0.512591	0.000339256	0.700962	Q19845	NP_509296.1	Uncharacterized protein	transmembrane transport [GO:0055085]			N.A.	N.A.	N.A.	AFD, ASER, excretory cell, intestine, neuron	F27D9.2 is an ortholog of human MFSD8 (major facilitator superfamily domain containing 8); microarray and RNA sequencing studies indicate that F27D9.2 is affected by Mercuric Chloride, Rotenone, Bisphenol A, 4-bromodiphenyl ether, Zidovudine, Cadmium, Fluoranthene, Diazinon, Humic substances, R24, Sirolimus, Allantoin, Ag nanoparticles, and Cholesterol; tiling array, RNA sequencing, and microarra…
WBGene00014205	ZK1058.5	ZK1058.5	-0.512752	0.000934781	0.700884	Q23383	NP_497790.2	Methyltransferase-like protein (EC 2.1.1.-)		methyltransferase activity [GO:0008168]		organism development variant	N.A.	N.A.	coelomocyte, germ line, germline precursor cell, gon_male_dtc anterior, gon_male_dtc posterior, Z1.p, Z4.a	ZK1058.5 is an ortholog of human METTL6 (methyltransferase like 6); RNA sequencing and microarray studies indicate that ZK1058.5 is affected by Rotenone, Zidovudine, Cry5B, Paraquat, Sirolimus, and Allantoin; tiling array and RNA sequencing studies indicate that ZK1058.5 is enriched in the coelomocytes, germline precursor cell, gon_male_dtc posterior, gon_male_dtc anterior, Z1.p, Z4.a, and germ l…
WBGene00022554	duxl-1	ZC204.2	-0.513035	0.00232406	0.700747	P91547	NP_494032.1	DUX (Vertebrate dual homeobox) Like		DNA binding [GO:0003677]		transgene expression reduced	N.A.	coelomocyte, excretory cell, germ line, gonad, hypodermis, intestine, spermatheca	body wall muscle cell, coelomocyte, germ line, gon_male_dtc anterior, gon_male_dtc posterior, hypodermis, intestine, Z1, Z1.p, Z4, Z4.a	duxl-1 is a divergent homeobox gene; it encodes three homeodomains, two of which are likely to have arisen as internal tandem duplication; duxl-1 is expressed in the gonad, hypodermis, coelomocyte, intestine, germ line, and the excretory cell.
WBGene00022412	Y102A11A.2	Y102A11A.2	-0.513716	0.0030207	0.700416	Q95XK1	NP_001024951.1, NP_001024950.1	Uncharacterized protein				N.A.	N.A.	body wall musculature, head, intestine, lateral nerve cord, nervous system, rectal gland cell, reproductive system, tail, ventral cord neuron, vulval muscle	dopaminergic neuron, intestine, neuron, OLL, pharyngeal muscle cell, PVD	Y102A11A.2 is expressed in the nervous system, head, tail, reproductive system, intestine, rectal gland cell, and the body wall musculature.
WBGene00011227	R11.2	R11.2	-0.514519	0.00301222	0.700026	O62346	NP_510637.1	Neuropeptide-Like Protein	neuropeptide signaling pathway [GO:0007218]			N.A.	N.A.	N.A.	body wall musculature, hypodermis, intestine, neuron	RNA sequencing and microarray studies indicate that nlp-67 is affected by 1-methylnicotinamide, D-glucose, and Dafa#1; tiling array, RNA sequencing, and microarray studies indicate that nlp-67 is enriched in the hypodermis, intestine, and body wall musculature and in neurons.
WBGene00004198	prx-13	F32A5.6	-0.516778	0.00018778	0.698931	Q19951	NP_495513.1	Probable peroxisomal membrane protein PEX13 (Peroxin-13)	nematode larval development [GO:0002119]; protein import into peroxisome matrix, docking [GO:0016560]			embryonic lethal, foraging behavior variant, growth variant, L1 arrest, larval arrest, peroxisome physiology variant, slow growth	N.A.	N.A.	germline precursor cell, hypodermis, intestine, pharyngeal muscle cell, Psub1	prx-13 is orthologous to the human gene PEX13 (OMIM:601789), which when mutated leads to Zellweger syndrome or neonatal adrenoleukodystrophy.
WBGene00018966	F56D2.5	F56D2.5	-0.51707	0.000111088	0.698789	Q20871	NP_498196.1	RBR-type E3 ubiquitin transferase (EC 2.3.2.31)	innate immune response [GO:0045087]; positive regulation of proteasomal ubiquitin-dependent protein catabolic process [GO:0032436]; protein polyubiquitination [GO:0000209]	metal ion binding [GO:0046872]; ubiquitin conjugating enzyme binding [GO:0031624]; ubiquitin protein ligase activity [GO:0061630]		N.A.	N.A.	N.A.	intestine	F56D2.5 is an ortholog of human RNF14 (ring finger protein 14); F56D2.5 is involved in innate immune response[HEP]; F56D2.5 is predicted to have ubiquitin-protein transferase activity, based on protein domain information.
WBGene00021912	Y55B1BR.2	Y55B1BR.2	-0.519985	8.64779e-05	0.697379	Q95XW7	NP_497199.1	Uncharacterized protein				embryonic lethal, engulfment variant	N.A.	N.A.	AFD, ASER, PLM	RNA sequencing and microarray studies indicate that Y55B1BR.2 is affected by jmjd-1.2, pgl-1, pgl-3, glh-4, glh-1, lin-22, ain-1, ain-2, fbf-1, gld-2, and eat-2; microarray studies indicate that Y55B1BR.2 is affected by Cholestanol, Chlorpyrifos, Diazinon, and Sirolimus; RNA sequencing studies indicate that Y55B1BR.2 is enriched in the AFD, ASER, and PLM neurons.
WBGene00016490	C36E6.2	C36E6.2	-0.520427	0.000988465	0.697166	Q9BL99	NP_510827.2	Uncharacterized protein	macroautophagy [GO:0016236]	ubiquitin binding [GO:0043130]		egg laying variant, larval arrest, locomotion variant, sluggish, sterile	N.A.	N.A.	intestine, neuron	C36E6.2 is an ortholog of human C6orf106 (chromosome 6 open reading frame 106); microarray, tiling array, and RNA sequencing studies indicate that C36E6.2 is affected by cyc-1, daf-12, cox-5B, jmjd-3.1, jmjd-1.2, pgl-1, pgl-3, glh-4, glh-1, alg-2, lin-35, dpl-1, and efl-1; microarray studies indicate that C36E6.2 is affected by Paraquat, adsorbable organic bromine compounds, and Sirolimus; microa…
WBGene00000665	col-90	C29E4.1	-0.521558	0.00263345	0.696619	P34340	NP_498729.1	Putative cuticle collagen 90		structural constituent of cuticle [GO:0042302]		dumpy	N.A.	N.A.	hypodermis, OLL, PVD	col-90 is an ortholog of human SFTPD (surfactant protein D); col-90 is a structural constituent of cuticle, based on protein domain information.
WBGene00009383	F35B12.3	F35B12.3	-0.521609	0.000129467	0.696595	Q20013	NP_505942.2	Uncharacterized protein				N.A.	N.A.	N.A.	FLP, OLL, PVD	RNA sequencing and microarray studies indicate that F35B12.3 is affected by Rotenone, Bisphenol A, Cry5B, 4-bromodiphenyl ether, Zidovudine, Resveratrol, Acrylamide, Cadmium, Chlorpyrifos, Diazinon, Quercetin, Hydrolyzable Tannins, single-walled carbon nanotubes, Selenium, Colistin, and Allantoin; microarray studies indicate that F35B12.3 is enriched in the PVD, OLL, and FLP neurons.
WBGene00022736	ZK418.7	ZK418.7	-0.523741	0.00235396	0.695566	Q23485	NP_498546.1	Uncharacterized protein				organism development variant	N.A.	N.A.	amphid sheath cell, ASER, hermaphrodite-specific, intestine, neuron	Microarray studies indicate that ZK418.7 is affected by Methylmercuric chloride, Cry5B, Humic substances, and Colistin; tiling array, RNA sequencing, and microarray studies indicate that ZK418.7 is enriched in the intestine, amphid sheath cell, and hermaphrodite-specific tissues and in neurons including the ASER neurons.
WBGene00015047	faah-1	B0218.1	-0.524143	1.04575e-05	0.695372	Q17449	NP_501368.1, NP_872095.1	Fatty acid amide hydrolase 1 (EC 3.5.1.99)	positive regulation of axon regeneration [GO:0048680]	amidase activity [GO:0004040]; anandamide amidohydrolase activity [GO:0103073]; oleamide hydrolase activity [GO:0102077]		N.A.	N.A.	intestine, pharyngeal neuron, pharynx	germline precursor cell, intestine	faah-1 encodes a putative fatty acid amide hydrolase enzyme and is orthologous to human fatty acid amide hydrolase (FAAH); faah-1 is involved in regulating N-acylethanolamines (NAEs), which are lipid-derived signalling molecules, reduced levels of which, under dietary restriction, result in increased lifespan; faah-1 functions to hydrolyse N-acylethanolamines (NAEs) like eicosapentaenoyl ethanola…
WBGene00016759	C49A9.5	C49A9.5	-0.524971	0.00058565	0.694973	O44151	NP_500933.1	Uncharacterized protein				N.A.	N.A.	N.A.	FLP, intestine	RNA sequencing and microarray studies indicate that C49A9.5 is affected by D-glucopyranose, Bisphenol S, Zidovudine, Hydrolyzable Tannins, Humic substances, and Colistin; tiling array, microarray, and RNA sequencing studies indicate that C49A9.5 is enriched in the intestine and in the FLP neurons.
WBGene00044143	K09E9.4	K09E9.4	-0.527049	0.0024638	0.693973	Q564X6	NP_001024780.1	Uncharacterized protein	negative regulation of cAMP-dependent protein kinase activity [GO:2000480]	cAMP-dependent protein kinase inhibitor activity [GO:0004862]		N.A.	N.A.	N.A.	DA neuron, excretory cell, neuron, NSM, VA neuron	K09E9.4 is an ortholog of human PKIA (protein kinase (cAMP-dependent, catalytic) inhibitor alpha), PKIG (protein kinase (cAMP-dependent, catalytic) inhibitor gamma) and PKIB (protein kinase (cAMP-dependent, catalytic) inhibitor beta); K09E9.4 is predicted to have cAMP-dependent protein kinase inhibitor activity, based on protein domain information.
WBGene00017720	F22F7.2	F22F7.2	-0.528218	0.00341081	0.693411	Q9GZF0	NP_503576.2	Uncharacterized protein		oxidoreductase activity [GO:0016491]		reduced brood size	N.A.	intestine	AFD, PLM	F22F7.2 is an ortholog of human SCCPDH (saccharopine dehydrogenase (putative)); F22F7.2 is predicted to have oxidoreductase activity, based on protein domain information; F22F7.2 is expressed in the intestine.
WBGene00001592	glc-2	F25F8.2	-0.530025	0.00112264	0.692543	Q17328	NP_491470.1	Glutamate-gated chloride channel subunit beta (Glu-Cl subunit beta) (Avermectin-sensitive glutamate-gated chloride channel subunit)	chloride transmembrane transport [GO:1902476]	extracellularly glutamate-gated chloride channel activity [GO:0008068]; transmembrane signaling receptor activity [GO:0004888]		embryonic lethal	N.A.	pm4	hypodermis, NSM	glc-2 encodes the beta subunit of a glutamate-gated chloride channel; in vivo, GLC-2 is capable of forming homomeric glutamate-activated channels, as well as heteromeric channels with GLC-1 that can be activated by glutamate and avermectins, antihelmintics that inhibit pharyngeal pumping; as loss of glc-2 activity via large-scale RNAi screens does not result in any obvious abnormalities, the prec…
WBGene00010050	F54D5.4	F54D5.4	-0.53044	0.00011437	0.692344	Q20770	NP_496472.1	Uncharacterized protein	innate immune response [GO:0045087]			N.A.	N.A.	N.A.	intestine	F54D5.4 is involved in innate immune response[HEP].
WBGene00012948	dhhc-2	Y47H9C.2	-0.531346	9.03316e-05	0.691909	Q9XWD7	NP_493007.2	Palmitoyltransferase (EC 2.3.1.225)		protein-cysteine S-palmitoyltransferase activity [GO:0019706]		life span variant	N.A.	N.A.	AFD, AVE, excretory cell, GABAergic neuron, germline precursor cell, intestine, neuron, OLL, PVD	dhhc-2 is an ortholog of human ZDHHC18 (zinc finger DHHC-type containing 18), ZDHHC14 (zinc finger DHHC-type containing 14) and ZDHHC9 (zinc finger DHHC-type containing 9); RNA sequencing and microarray studies indicate that dhhc-2 is affected by htz-1, cox-5B, jmjd-3.1, unc-75, mir-34, pgl-1, pgl-3, glh-4, glh-1, sma-4, lin-22, ain-1, ain-2, and mir-35; RNA sequencing studies indicate that dhhc-…
WBGene00016879	C52D10.12	C52D10.12	-0.532792	2.25024e-05	0.691216	A3QM97	NP_503052.1	Metal transporter cnnm-1 (CNNM family homolog 1)	determination of adult lifespan [GO:0008340]; magnesium ion homeostasis [GO:0010960]; magnesium ion transport [GO:0015693]; positive regulation of gonad development [GO:1905941]; positive regulation of multicellular organism growth [GO:0040018]; positive regulation of vulval development [GO:0040026]; response to magnesium ion [GO:0032026]			N.A.	N.A.	body wall musculature, hypodermis, intestine, neuron, pharynx, rectum	AFD, FLP, OLL, PLM, PVD	C52D10.12 encodes a predicted transmembrane protein orthologous to human ACDP1-ACDP4 and S. cerevisiae MAM3, and paralogous to C01H6.6, C33D12.2, M02F4.3, R04E5.2, and R13G10.4; by orthology with MAM3, C52D10.12 may participate in metal homoeostasis; C52D10.12, MAM3, and ACDP1-ACDP4 belong to a family of proteins (sharing an ACD domain) from bacteria, yeast, plants, and metazoa; murine Acdp1 is a…
WBGene00001027	dnj-9	F11G11.7	-0.533911	0.000557246	0.69068	P91243	NP_494872.2	DNaJ domain (Prokaryotic heat shock protein)				N.A.	N.A.	body wall musculature, excretory cell, head neuron, hypodermis, intestine, nervous system, pharynx, ventral cord neuron	germ line, intestine	This gene encodes a protein containing a DnaJ ('J') domain.
WBGene00004358	rhr-1	F08F3.3	-0.534127	0.00013172	0.690576	Q22947	NP_504436.1	RH (Rhesus) antigen Related	ammonium transmembrane transport [GO:0072488]; organic cation transport [GO:0015695]	ammonium transmembrane transporter activity [GO:0008519]		comma arrest emb, embryonic lethal, pretzel arrest	N.A.	AMsoL, AMsoR, excretory cell, gonadal sheath cell, head, hypodermis, intestine, nervous system, rectal gland cell, reproductive system, seam cell, spermatheca, tail neuron, vulva	body wall musculature, dorsal nerve cord, excretory cell, GABAergic neuron, intestine, lateral nerve cord, nerve ring, somatic neuron, tail neuron, ventral nerve cord, vulval muscle	rhr-1 encodes an ortholog of human Rhesus blood-group associated glycoprotein (RHAG; OMIM:180297, mutated in chronic hemolytic anemia), a member of the ammonium transporter family, and affects general levels of mRNA transcripts, and embryonic viability in a large-scale RNAi screen.
WBGene00000993	dhs-30	T25G12.7	-0.536408	0.000199277	0.689486	Q65ZI3	NP_510793.2	DeHydrogenases, Short chain		oxidoreductase activity [GO:0016491]		N.A.	N.A.	N.A.	coelomocyte, intestine	dhs-30 encodes a member of the short-chain dehydrogenases/reductases family (SDR) homologous to HSD, which when mutated leads to cortisol 11-beta ketoreductase deficiency (OMIM:218030).
WBGene00013284	daf-22	Y57A10C.6	-0.537571	4.16246e-07	0.68893	G5EDP2	NP_496639.1	Non-specific lipid-transfer protein-like 2 (NSL-TP2) (EC 2.3.1.176) (3-keto-acyl-CoA thiolase) (Abnormal dauer formation protein 22) (Propanoyl-CoA C-acyltransferase) (Protein P-44)	acyl-CoA metabolic process [GO:0006637]; ascaroside biosynthetic process [GO:1904070]; dauer entry [GO:0043053]; dauer exit [GO:0043054]; lipid transport [GO:0006869]; negative regulation of lipid storage [GO:0010888]; olfactory learning [GO:0008355]; pheromone biosynthetic process [GO:0042811]; positive regulation of developmental growth [GO:0048639]; positive regulation of nematode larval devel…	lipid binding [GO:0008289]; propanoyl-CoA C-acyltransferase activity [GO:0033814]		fat content increased, hydrogen peroxide levels reduced, larval arrest, short defecation cycle	ascaroside biosynthesis defective, ascaroside biosynthesis variant, dauer formation variant, dauer pheromone production defective, fat associated bodies increased, fat content variant, larval arrest, pheromone behavioral response variant, pheromone production variant, physiology variant	body wall musculature, hypodermis, intestine	germ line, intestine, pharyngeal muscle cell, Psub1	daf-22 encodes the C. elegans ortholog of human sterol carrier protein SCP2, which catalyzes the final step in peroxisomal fatty acid beta-oxidation; in C. elegans, DAF-22 activity is required for dauer pheromone biosynthesis; daf-22 mutant animals cannot produce dauer pheromone, but can synthesize weakly active longer-chain fatty acid derivatives; in synthesizing dauer pheromone, DAF-22 acts dow…
WBGene00007560	C14A4.9	C14A4.9	-0.538532	0.00317861	0.688471	Q17956	NP_496288.1	Uncharacterized protein				age associated fluorescence increased, shortened life span	N.A.	N.A.	germline precursor cell, hypodermis, intestine	RNA sequencing and microarray studies indicate that C14A4.9 is affected by Methylmercury hydroxide, 1-methylnicotinamide, Methylmercuric chloride, Rotenone, Manganese chloride, Indole, Sesamin, Zidovudine, Cadmium, Quercetin, Selenium, Colistin, Dafa#1, adsorbable organic bromine compounds, and Sirolimus; tiling array, RNA sequencing, and microarray studies indicate that C14A4.9 is enriched in th…
WBGene00010038	rheb-1	F54C8.5	-0.538778	6.17555e-05	0.688354	P34443	NP_499079.1	GTP-binding protein Rheb homolog 1	positive regulation of TOR signaling [GO:0032008]; signal transduction [GO:0007165]	GTPase activity [GO:0003924]; GTP binding [GO:0005525]; metal ion binding [GO:0046872]		cell fate specification variant, clear, locomotion variant, long, slow growth, sterile progeny, thin, transgene expression reduced	lethal, sterile	N.A.	germ line, intestine	rheb-1 encodes a GTPase orthologous to the mammalian Rheb and Rheb1 GTPases; by homology, RHEB-1 is predicted to function as a regulator of LET_363/TOR function; in C. elegans, rheb-1 plays an essential role in mediating intermittent fasting (IF)-induced longevity; further, loss of rheb-1 activity via RNAi indicates that rheb-1 is involved in the mitochondrial unfolded protein response and that i…
WBGene00020865	T27E4.7	T27E4.7	-0.539448	0.00145901	0.688034	Q23055	NP_505353.1	Uncharacterized protein				fat content reduced, reduced brood size	N.A.	N.A.	AFD, BAG, intestine, muscle cell, neuron	Microarray studies indicate that T27E4.7 is affected by Tunicamycin, Humic substances, adsorbable organic bromine compounds, Allantoin, Sirolimus, and Cholesterol; tiling array, RNA sequencing, and microarray studies indicate that T27E4.7 is enriched in the intestine and muscle cell and in neurons including the BAG and AFD neurons.
WBGene00004197	prx-12	F08B12.2	-0.540679	0.000388325	0.687448	Q19189	NP_001309444.1	Putative peroxisome assembly protein 12 (Peroxin-12)	nematode larval development [GO:0002119]; peroxisome organization [GO:0007031]; protein import into peroxisome matrix [GO:0016558]; protein monoubiquitination [GO:0006513]	protein C-terminus binding [GO:0008022]; ubiquitin-protein transferase activity [GO:0004842]; zinc ion binding [GO:0008270]		clear, embryonic lethal, foraging behavior variant, L1 arrest, larval arrest, peroxisome morphology variant, slow growth	N.A.	N.A.	intestine	prx-12 is an ortholog of human Pex12 (peroxisomal biogenesis factor 12); prx-12 is involved in nematode larval development and peroxisome organization; prx-12 is predicted to have protein C-terminus binding activity and zinc ion binding activity, based on protein domain information.
WBGene00012538	Y37A1B.5	Y37A1B.5	-0.541331	0.000110443	0.687137	Q9XXF9	NP_001255777.1, NP_001255778.1	Uncharacterized protein		selenium binding [GO:0008430]		N.A.	N.A.	hypodermis	body wall musculature, dorsal nerve cord, germline precursor cell, intestine, lateral nerve cord, nerve ring, pharyngeal muscle cell, pharynx, somatic neuron, tail neuron, ventral nerve cord, vulval muscle	Y37A1B.5 is an ortholog of human SELENBP1 (selenium binding protein 1); Y37A1B.5 is predicted to have selenium binding activity, based on protein domain information; Y37A1B.5 is expressed in the hypodermis.
WBGene00008476	E03H4.8	E03H4.8	-0.542521	7.57057e-05	0.68657	O17742	NP_493151.1	Uncharacterized protein	intracellular protein transport [GO:0006886]; vesicle-mediated transport [GO:0016192]	structural molecule activity [GO:0005198]		apoptosis reduced, cell membrane organization biogenesis variant, clear, diakinesis progression during oogenesis variant, diplotene absent during oogenesis, diplotene region organization variant, embryonic lethal, fewer germ cells, germ cell compartment anucleate, germ cell compartment expansion variant, germ cell compartment multinucleate, gonad morphology variant, gonad vesiculated, larval arre…	N.A.	N.A.	amphid sheath cell, intestine, NSM	E03H4.8 encodes one of two C. elegans proteins with similarity to the beta' coat protein of the COPI vesicular coat; by homology, E03H4.8 is required for retrograde trafficking from the cis-Golgi to the endoplasmic reticulum and trafficking within the Golgi stack; in C. elegans, RNAi experiments indicate that E03H4.8 is required for proper germ cell development and reproduction; about 10% to 20% …
WBGene00016769	C49C8.5	C49C8.5	-0.543696	8.80763e-05	0.686011	Q18705	NP_501481.2	Uncharacterized protein	innate immune response [GO:0045087]			N.A.	N.A.	intestine	intestine	C49C8.5 is an ortholog of members of the human Fibrinogen C domain containing family including ANGPT2; C49C8.5 is involved in innate immune response[HEP]; C49C8.5 is expressed in the intestine.
WBGene00001761	gst-13	T26C5.1	-0.544204	6.78456e-07	0.68577	Q22814	NP_495967.1	Glutathione S-Transferase	innate immune response [GO:0045087]	transferase activity [GO:0016740]		organism electrophilic stress hypersensitive	N.A.	N.A.	excretory cell, GABAergic neuron, germ line, intestine, pharynx	gst-13 is an ortholog of members of the human GST (Soluble glutathione S-transferases) family including HPGDS; gst-13 is involved in innate immune response[HEP].
WBGene00018283	sulp-3	F41D9.5	-0.544446	0.000325767	0.685655	Q94225	NP_509424.2	Sulfate permease family protein 3	bicarbonate transport [GO:0015701]; chloride transmembrane transport [GO:1902476]; regulation of intracellular pH [GO:0051453]; regulation of membrane potential [GO:0042391]	anion:anion antiporter activity [GO:0015301]; bicarbonate transmembrane transporter activity [GO:0015106]; chloride channel activity [GO:0005254]; oxalate transmembrane transporter activity [GO:0019531]; secondary active sulfate transmembrane transporter activity [GO:0008271]; sulfate transmembrane transporter activity [GO:0015116]		N.A.	N.A.	pm3, pm4, pm5, pm6, pm7	N.A.	sulp-3 encodes one of eight C. elegans members of the sulfate permease family of anion transporters; by homology, SULP-3 is predicted to function as an anion transporter that regulates cellular pH and volume via transmembrane movement of electrolytes and fluids; a sulp-3::GFP transcriptional fusion is expressed exclusively in the pharyngeal muscles.
WBGene00007455	ugt-22	C08F11.8	-0.544606	0.000655937	0.685579	Q9U3Q6	NP_502633.1	UDP-glucuronosyltransferase (EC 2.4.1.17)	metabolic process [GO:0008152]	glucuronosyltransferase activity [GO:0015020]		N.A.	N.A.	N.A.	AFD, intestine, OLL, PVD	ugt-22 is an ortholog of human UGT3A2 (UDP glycosyltransferase family 3 member A2) and UGT3A1 (UDP glycosyltransferase family 3 member A1); ugt-22 is predicted to have transferase activity, transferring hexosyl groups, based on protein domain information.
WBGene00003654	nhr-64	C45E1.1	-0.545573	0.000204505	0.685119	O44960	NP_001021042.2, NP_001021043.2	Nuclear Hormone Receptor family	transcription, DNA-templated [GO:0006351]	DNA binding transcription factor activity [GO:0003700]; sequence-specific DNA binding [GO:0043565]; steroid hormone receptor activity [GO:0003707]; zinc ion binding [GO:0008270]		fat content increased, lipid composition variant, mRNA levels increased, mRNA levels reduced, reduced brood size, slow growth	N.A.	head neuron, hypodermis, intestine, pharynx, tail neuron, ventral cord neuron	coelomocyte, intestine, muscle cell	nhr-64 encodes a conserved nuclear receptor that is a member of the NR2 subfamily of nuclear receptors that contains Drosophila and human HNF4 (OMIM:600281, mutations in human HNF4A are associated with Type I MODY (maturity-onset diabetes of the young)); by homology, NHR-64 is predicted to function as a transcription factor that may activate or repress transcription in response to a hormonal sign…
WBGene00022231	tyr-6	Y73B6BL.1	-0.546025	0.000501854	0.684904	Q95XC6	NP_500987.3	TYRosinase		metal ion binding [GO:0046872]; oxidoreductase activity [GO:0016491]		N.A.	N.A.	N.A.	excretory cell, GABAergic neuron, hypodermis, neuron, OLL, PVD	tyr-6 is orthologous to the human gene tyrosinase (TYR), which is involved in the conversion of tyrosine to melanin.
WBGene00008100	C44H9.5	C44H9.5	-0.546533	0.000293571	0.684663	Q18634	NP_506216.2	Uncharacterized protein				N.A.	N.A.	N.A.	dopaminergic neuron, hypodermis, OLL, PVD	Microarray studies indicate that C44H9.5 is affected by Resveratrol, Microcystin-LR, Sirolimus, Allantoin, Ag nanoparticles, and Cholesterol; tiling array studies indicate that C44H9.5 is enriched in the hypodermis and in the dopaminergic, PVD, and OLL neurons.
WBGene00003554	nas-38	F57C12.1	-0.549253	0.00233373	0.683374	Q20942	NP_508120.2	Zinc metalloproteinase nas-38 (EC 3.4.24.-) (Nematode astacin 38)	molting cycle, collagen and cuticulin-based cuticle [GO:0018996]	metalloendopeptidase activity [GO:0004222]; zinc ion binding [GO:0008270]		extended life span, motor neuron morphology variant, synapse density variant, transgene subcellular localization variant	N.A.	hypodermis, rectal epithelium, reproductive system, seam cell, vulva	DA neuron, hypodermis, VA neuron	nas-38 encodes an astacin-like metalloprotease; loss of nas-38 activity via RNAi in an rrf-3 mutant background results in an extended life span.
WBGene00008629	cpt-5	F09F3.9	-0.550416	0.00197786	0.682823	G5EG54	NP_741637.1	Carnitine Palmitoyl Transferase		transferase activity, transferring acyl groups [GO:0016746]		dauer constitutive	N.A.	N.A.	coelomocyte, intestine	cpt-5 is an ortholog of human CPT1C (carnitine palmitoyltransferase 1C), CPT1B (carnitine palmitoyltransferase 1B) and CPT1A (carnitine palmitoyltransferase 1A); cpt-5 is predicted to have transferase activity, transferring acyl groups, based on protein domain information.
WBGene00004911	snf-12	T25B6.7	-0.551537	0.000319024	0.682293	O45813	NP_509527.1	Transporter	positive regulation of antifungal peptide production [GO:0002804]	neurotransmitter:sodium symporter activity [GO:0005328]; transcription factor binding [GO:0008134]; transporter activity [GO:0005215]		N.A.	cell stress response variant	amphid socket cell, excretory cell, hypodermis, phasmid socket cell, seam cell, vulva	hypodermis, PLM	snf-12 encodes a transmembrane protein that is member of a highly conserved sodium-dependent neurotransmitter symporter family orthologous to mammalian sodium and chloride-dependent neurotransmitter transporters, or solute carrier 6 family (SLC6) members (OMIM: 610300); snf-12 is essential for a neuroendocrine TGF-beta and p38/MAPK immune signaling pathways; snf-12 is required cell autonomously f…
WBGene00014138	clec-186	ZK896.7	-0.554609	3.1974e-05	0.680842	O02343	NP_502450.2	C-type LECtin	innate immune response [GO:0045087]	carbohydrate binding [GO:0030246]		extended life span	N.A.	N.A.	ASER, intestine, OLL, PVD	clec-186 is an ortholog of members of the human COLEC (Collectins) family including COLEC11; clec-186 is involved in innate immune response[HEP].
WBGene00003720	nhr-130	T01G6.8	-0.558494	0.00105726	0.679011	O16963	NP_503216.1	Nuclear hormone receptor family member nhr-130	transcription, DNA-templated [GO:0006351]	DNA binding transcription factor activity [GO:0003700]; sequence-specific DNA binding [GO:0043565]; zinc ion binding [GO:0008270]		N.A.	N.A.	N.A.	ASER, intestine, NSM	nhr-130 is predicted to have DNA-binding transcription factor activity, sequence-specific DNA binding activity, and zinc ion binding activity, based on protein domain information.
WBGene00009450	ugt-58	F35H8.6	-0.558949	9.66593e-07	0.678797	Q20086	NP_496059.2	Putative UDP-glucuronosyltransferase ugt-58 (UDPGT 58) (EC 2.4.1.17)	metabolic process [GO:0008152]	glucuronosyltransferase activity [GO:0015020]		N.A.	lethal, sterile	head neuron, hypodermis, intestine, nervous system, neuron, tail neuron	intestine, OLL, PVD	ugt-58 is an ortholog of human UGT3A2 (UDP glycosyltransferase family 3 member A2), UGT3A1 (UDP glycosyltransferase family 3 member A1) and UGT8 (UDP glycosyltransferase 8); ugt-58 is predicted to have transferase activity, transferring hexosyl groups, based on protein domain information; ugt-58 is expressed in the hypodermis, nervous system, and the intestine.
WBGene00022721	ugtp-1	ZK370.7	-0.559535	5.90591e-05	0.678521	Q02334	NP_498930.1	UDP-galactose translocator 1	carbohydrate transport [GO:0008643]	pyrimidine nucleotide-sugar transmembrane transporter activity [GO:0015165]		N.A.	N.A.	N.A.	germ line, intestine, OLL, PVD	ugtp-1 encodes a nucleotide sugar transporter; UGTP-1 is predicted to transport UDP-galactose; a UGTP-1::GFP fusion protein is present in the cytoplasm in a punctate pattern and also seen on cortical granules in oocytes and briefly in newly fertilized embryos.
WBGene00007210	agmo-1	BE10.2	-0.559808	0.000173383	0.678392	O17554	NP_499664.2	Alkylglycerol monooxygenase (EC 1.14.16.5) (Transmembrane protein 195 homolog)	lipid biosynthetic process [GO:0008610]; membrane lipid metabolic process [GO:0006643]	glyceryl-ether monooxygenase activity [GO:0050479]; iron ion binding [GO:0005506]		age associated fluorescence increased, no induction of antimicrobial peptide expression after infection, shortened life span	chemical hypersensitive	hyp7 syncytium, hypodermis, seam cell	AFD, germline precursor cell, hypodermis, intestine, PLM	agmo-1 is an ortholog of human AGMO (alkylglycerol monooxygenase); agmo-1 is predicted to have iron ion binding activity and oxidoreductase activity, based on protein domain information; agmo-1 is expressed in the hypodermis.
WBGene00017577	F18F11.4	F18F11.4	-0.561892	0.0032513	0.677413	P91263	NP_499906.3	Uncharacterized protein				avoids bacterial lawn, pharyngeal pumping reduced, slow growth	N.A.	N.A.	OLL, PVD	RNA sequencing and microarray studies indicate that F18F11.4 is affected by Ethanol, Methylmercury hydroxide, 1-methylnicotinamide, and Dafa#1; microarray studies indicate that F18F11.4 is enriched in the PVD and OLL neurons.
WBGene00016505	ttr-33	C37C3.13	-0.564517	0.000179618	0.676182	Q8I7H9	NP_872192.1	TransThyretin-Related family domain				N.A.	N.A.	N.A.	N.A.	RNA sequencing and microarray studies indicate that ttr-33 is affected by Rotenone and Colistin.
WBGene00011235	suro-1	R11A5.7	-0.565461	0.00284689	0.675739	Q9XU75	NP_492177.2	Putative carboxypeptidase suro-1 (EC 3.4.17.-) (Suppressor of roller 1)		metallocarboxypeptidase activity [GO:0004181]; zinc ion binding [GO:0008270]		dumpy	N.A.	hypodermis, intestine	body wall musculature, germline precursor cell, hypodermis, intestine	suro-1 is an ortholog of human cpo (carboxypeptidase O) and members of the CP (M14 carboxypeptidases) family including CPA1; suro-1 is predicted to have metallocarboxypeptidase activity and zinc ion binding activity, based on protein domain information; suro-1 is expressed in the hypodermis and the intestine; suro-1 is localized to the collagen and cuticulin-based cuticle extracellular matrix and…
WBGene00001501	ftn-2	D1037.3	-0.565559	0.000309273	0.675693	Q9TYS3	NP_491198.1	Ferritin (EC 1.16.3.1)	defense response to Gram-positive bacterium [GO:0050830]; intracellular sequestering of iron ion [GO:0006880]; iron ion transport [GO:0006826]	ferric iron binding [GO:0008199]; ferroxidase activity [GO:0004322]; identical protein binding [GO:0042802]; iron ion binding [GO:0005506]		drug response variant, organism development variant	N.A.	body wall musculature, hypodermis, intestine, pharynx	DA neuron, hypodermis, I5 neuron, intestine, pharyngeal muscle cell, retrovesicular ganglion, SAB, VA neuron	ftn-2 encodes one of two C. elegans ferritin heavy chain homologs; loss of ftn-2 activity via deletion mutation results in slightly lower brood sizes and, under iron stress conditions, slightly faster growth from the L4 to adult stage of development, and slightly reduced lifespan; an ftn-2::gfp reporter fusion is expressed in diverse tissues, including the pharynx, intestine, and hypodermis, and …
WBGene00004928	soc-1	F41F3.2	-0.566204	0.000110727	0.675392	G5EDJ4	NP_504250.2	Multisubstrate adapter protein soc-1 (Suppressor Of Clr protein 1)	dauer larval development [GO:0040024]			neuron degeneration variant, nicotine resistant, protein expression variant, protein subcellular localization variant	scrawny	N.A.	hypodermis, OLL, PVD	soc-1 encodes a multisubstrate adaptor (MSA) protein containing an amino-terminal pleckstrin homology domain (PHD); SOC-1 functions as a regulator of growth factor receptor-mediated signal transduction pathways; in addition, SOC-1 also displays functional interactions with the nicotinic acetylcholine receptors (nAChRs): soc-1 mutations result in reduced receptor levels at synapses; SOC-1 physical…
WBGene00002990	lin-1	C37F5.1	-0.566768	2.40346e-05	0.675128	G5EDL0	NP_001023051.1, NP_001294301.1	LIN-1	negative regulation of transcription by RNA polymerase II [GO:0000122]; oviposition [GO:0018991]; post-embryonic development [GO:0009791]; regulation of cell fate specification [GO:0042659]; reproduction [GO:0000003]; vulval development [GO:0040025]	RNA polymerase II regulatory region sequence-specific DNA binding [GO:0000977]; RNA polymerase II transcription factor activity, sequence-specific DNA binding [GO:0000981]; sequence-specific DNA binding [GO:0043565]		embryonic lethal, fat content increased, multivulva, protruding vulva, transgene expression reduced	ectopic expression transgene, egg laying defective, exploded through vulva, high incidence male progeny, hook morphology variant, larval lethal, lethal, male mating defective, multivulva, pattern of transgene expression variant, sterile, vulva cell fate specification variant, vulval cell induction increased, vulval cell lineage variant, vulvaless	anal depressor muscle, body wall musculature, reproductive system, uterine muscle, vulval muscle, vulval precursor cell	anal depressor muscle, body wall musculature, dorsal nerve cord, lateral nerve cord, muscle cell, nerve ring, OLL, pharynx, PVD, somatic neuron, tail neuron, ventral nerve cord, vulval muscle	lin-1 encodes an Ets-domain-containing transcription factor that is a member of the ETS gene family that includes human ELK1, 3, and 4 (OMIM:600247); LIN-1 functions as a general effector of MAP kinase-mediated signaling; when MAP kinase is inactive, LIN-1 forms a complex with LIN-31/WH that inhibits vulval cell fate specification; upon MAP kinase activation (vulval induction), LIN-1 is phosphory…
WBGene00020407	T10D4.3	T10D4.3	-0.567118	0.00159884	0.674964	Q9TZF2	NP_494455.1	CHItinase-Like	carbohydrate metabolic process [GO:0005975]; chitin catabolic process [GO:0006032]	chitinase activity [GO:0004568]; chitin binding [GO:0008061]		dauer lifespan extended	N.A.	N.A.	AFD, ALM, intestine, male-specific, muscle cell, PLM, Z1, Z4	chil-24 is predicted to have chitin binding activity, based on protein domain information.
WBGene00004856	sma-2	ZK370.2	-0.567186	0.000120083	0.674932	Q02330	NP_498931.2	Dwarfin sma-2 (MAD protein homolog 1)	nematode male tail tip morphogenesis [GO:0045138]; pharynx development [GO:0060465]; positive regulation of cell growth [GO:0030307]; positive regulation of multicellular organism growth [GO:0040018]; post-embryonic development [GO:0009791]; regulation of mesodermal cell fate specification [GO:0042661]; transcription, DNA-templated [GO:0006351]; transforming growth factor beta receptor signaling …	DNA binding [GO:0003677]; DNA binding transcription factor activity [GO:0003700]; metal ion binding [GO:0046872]		dauer gonad arrest variant, germline proliferation variant, organism development variant	amplitude of sinusoidal movement variant, annulae morphology variant, backing decreased, backward point velocity decreased, body posture amplitude decreased, body posture wavelength decreased, body size variant, coiling frequency, dumpy, forward locomotion decreased, forward point velocity decreased, frequency of body bend variant, head bend angle variant, male ray morphology variant, male tail m…	head, pharynx, reproductive system, seam cell, uterine muscle, vulval muscle	ASER, body wall musculature, dorsal nerve cord, intestine, lateral nerve cord, nerve ring, OLL, pharynx, PVD, somatic neuron, tail neuron, ventral nerve cord, vulval muscle	sma-2 encodes, along with sma-3 and sma-4, one of three C. elegans Smad proteins, with SMA-2 and SMA-3 most closely related to receptor-regulated Smads (R-Smads) and SMA-4 more closely related to co-mediator Smads (CoSmads); during development, SMA-2 functions in a TGF-beta signaling pathway to regulate body size and specification of sensory structures in the male tail; sma-2, through this pathwa…
WBGene00012235	W04A4.6	W04A4.6	-0.56742	0.000556719	0.674823	Q7YWR9	NP_001021665.1	Uncharacterized protein				N.A.	N.A.	N.A.	intestine, muscle cell	RNA sequencing studies indicate that W04A4.6 is affected by Rotenone and Zidovudine; RNA sequencing and microarray studies indicate that W04A4.6 is enriched in the muscle cell and intestine.
WBGene00012968	Y48A6B.7	Y48A6B.7	-0.567475	0.000444456	0.674797	Q9XXD0	NP_499418.1	Uncharacterized protein		catalytic activity [GO:0003824]		N.A.	N.A.	N.A.	excretory cell, intestine, OLL, PVD	Y48A6B.7 encodes a cytidine deaminase; by homology the product of Y48A6B.7 is predicted to function in deamination of cytidine to uracil.
WBGene00009927	F52B11.5	F52B11.5	-0.569026	0.00150625	0.674072	Q9XUF0	NP_502701.1	Uncharacterized protein				N.A.	N.A.	N.A.	intestine, muscle cell, neuron, pharynx, PLM	Microarray and RNA sequencing studies indicate that F52B11.5 is affected by lin-15B, spe-44, emr-1, lem-2, set-2, wrn-1, npr-1, hsf-1, mir-34, pgl-1, pgl-3, glh-4, glh-1, emb-4, dcr-1, octr-1, tbx-2, isp-1, and nuo-6; microarray studies indicate that F52B11.5 is affected by Methylmercuric chloride, Cry5B, and Diazinon; microarray and RNA sequencing studies indicate that F52B11.5 is enriched in th…
WBGene00021464	ugt-31	Y39G10AR.6	-0.570106	0.00207122	0.673567	Q86S61	NP_001021756.1	UDP-GlucuronosylTransferase	metabolic process [GO:0008152]	glucuronosyltransferase activity [GO:0015020]		N.A.	N.A.	N.A.	amphid sheath cell, intestine	ugt-31 is an ortholog of human UGT3A2 (UDP glycosyltransferase family 3 member A2) and UGT3A1 (UDP glycosyltransferase family 3 member A1); ugt-31 is predicted to have transferase activity, transferring hexosyl groups, based on protein domain information.
WBGene00019270	H41C03.3	H41C03.3	-0.570509	0.00303571	0.673379	O76634	NP_495166.2	Uncharacterized protein		acetylglucosaminyltransferase activity [GO:0008375]		dauer lifespan extended	lethal, sterile	N.A.	ASER, intestine	H41C03.3 is predicted to have acetylglucosaminyltransferase activity, based on protein domain information.
WBGene00007021	immp-1	C24H11.6	-0.572003	9.20679e-05	0.672682	Q9XVD2	NP_499523.2	Inner Mitochondrial Membrane Protease	mitochondrial respiratory chain complex assembly [GO:0033108]; protein processing involved in protein targeting to mitochondrion [GO:0006627]; signal peptide processing [GO:0006465]	serine-type peptidase activity [GO:0008236]		N.A.	N.A.	N.A.	AVA, AVD, AVE, AVG, germ line, intestine, PVC, RIM	immp-1 is an ortholog of human IMMP1L (inner mitochondrial membrane peptidase subunit 1); immp-1 is predicted to have serine-type peptidase activity, based on protein domain information.
WBGene00045387	K09H9.8	K09H9.8	-0.57252	0.000861826	0.672441	O44990	NP_001122493.1	Uncharacterized protein				transgene expression reduced	N.A.	N.A.	hypodermis	RNA sequencing and microarray studies indicate that K09H9.8 is affected by Rotenone, D-glucose, Cry5B, Resveratrol, Chlorpyrifos, Diazinon, and Humic substances; tiling array and proteomic studies indicate that K09H9.8 is enriched in the hypodermis.
WBGene00022610	ZC416.6	ZC416.6	-0.578107	9.41118e-06	0.669842	O44183	NP_500385.1, NP_001294270.1	LeukoTriene A4 Hydrolase homolog		metallopeptidase activity [GO:0008237]; zinc ion binding [GO:0008270]		fat associated bodies increased, fat content increased, peptide uptake by intestinal cell decreased, protein expression reduced, transgene expression increased	N.A.	intestine	AVE, intestine	ZC416.6 encodes a protein with similarity to bifunctional leukotriene A4 hydrolases/aminopeptidases; loss of ZC416.6 activity via RNAi results in decreased intestinal dipeptide transport, increased fat storage, and increased free fatty acid uptake, a phenotype that mimics loss-of-function mutations in the PEPT-1 intestinal peptide transporter; the product of ZC416.6 is predicted to regulate PEPT-…
WBGene00004321	rcn-1	F54E7.7	-0.578536	2.61737e-06	0.669643	P53806	NP_498223.2	Calcipressin-like protein (Down syndrome candidate region 1-like protein) (Regulator of calcineurin)	calcium-mediated signaling [GO:0019722]; negative regulation of phosphoprotein phosphatase activity [GO:0032515]; regulation of calcineurin-NFAT signaling cascade [GO:0070884]; response to hermaphrodite contact [GO:0034606]; thermosensory behavior [GO:0040040]; vulval location [GO:0034608]	calcium-dependent protein serine/threonine phosphatase regulator activity [GO:0008597]; nucleic acid binding [GO:0003676]; protein phosphatase 2B binding [GO:0030346]; protein serine/threonine phosphatase inhibitor activity [GO:0004865]		N.A.	N.A.	copulatory spicule, diagonal muscle, dorsal nerve cord, marginal cell, Pharyngeal gland cell, phasmid socket cell, PHCL, PHCR, R1AL, R1AR, R1BL, R1BR, R1stL, R1stR, R2AL, R2AR, R2BL, R2BR, R2stL, R2stR, R3AL, R3AR, R3BL, R3BR, R3stL, R3stR, R4AL, R4AR, R4BL, R4BR, R4stL, R4stR, R5AL, R5AR, R5BL, R5BR, R5stL, R5stR, R6AL, R6AR, R6BL, R6BR, R6stL, R6stR, R7AL, R7AR, R7BL, R7BR, R7stL, R7stR, R8AL, …	ASER, BAG, excretory cell, intestine, muscle cell, neuron, NSM, OLL, PLM, PVD	rcan-1 is an ortholog of human RCAN1 (regulator of calcineurin 1), RCAN3 (RCAN family member 3) and RCAN2 (regulator of calcineurin 2); rcan-1 is involved in negative regulation of phosphoprotein phosphatase activity, response to hermaphrodite contact, thermosensory behavior and vulval location; rcan-1 exhibits protein phosphatase 2B binding activity and protein serine/threonine phosphatase inhib…
WBGene00015693	ugt-28	C10H11.4	-0.578642	0.000110301	0.669594	P91038	NP_491437.1	UDP-GlucuronosylTransferase	metabolic process [GO:0008152]	glucuronosyltransferase activity [GO:0015020]		N.A.	N.A.	N.A.	AFD, coelomocyte	ugt-28 is an ortholog of human UGT3A2 (UDP glycosyltransferase family 3 member A2) and UGT3A1 (UDP glycosyltransferase family 3 member A1); ugt-28 is predicted to have transferase activity, transferring hexosyl groups, based on protein domain information.
WBGene00018955	F56C11.3	F56C11.3	-0.580105	0.0015042	0.668915	O44975	NP_490690.1	Sulfhydryl oxidase (EC 1.8.3.2)		flavin adenine dinucleotide binding [GO:0050660]; flavin-linked sulfhydryl oxidase activity [GO:0016971]; protein disulfide oxidoreductase activity [GO:0015035]		N.A.	lethal, sterile	body wall musculature, pharynx, reproductive system, vulval muscle	germ line, germline precursor cell, intestine, neuron	F56C11.3 is an ortholog of human GFER (growth factor, augmenter of liver regeneration); F56C11.3 is predicted to have thiol oxidase activity, based on protein domain information; F56C11.3 is expressed in the pharynx, reproductive system, and the body wall musculature.
WBGene00021397	Y38C1AA.6	Y38C1AA.6	-0.581135	0.00218919	0.668438	Q9N430	NP_499873.2	Uncharacterized protein				dauer constitutive	N.A.	N.A.	intestine	Tiling array, RNA sequencing, and microarray studies indicate that Y38C1AA.6 is affected by hpl-2, emr-1, daf-2, npr-1, let-418, mir-34, pgl-1, pgl-3, glh-4, glh-1, emb-4, sma-2, sma-4, hcf-1, sir-2.1, nuo-6, and daf-16; microarray studies indicate that Y38C1AA.6 is affected by Sirolimus; tiling array and RNA sequencing studies indicate that Y38C1AA.6 is enriched in the intestine.
WBGene00022858	ZK1193.2	ZK1193.2	-0.582866	0.000411724	0.667636	A0A1X7RBP4	NP_001338858.1, NP_001338859.1	Uncharacterized protein				N.A.	N.A.	N.A.	DA neuron, I5 neuron, intestine, retrovesicular ganglion, SAB, VA neuron	RNA sequencing and microarray studies indicate that ZK1193.2 is affected by Ethanol, Methylmercuric chloride, Mercuric Chloride, Rotenone, Mianserin, Bisphenol A, Bisphenol S, Atrazine, Cadmium, Cry5B, Quercetin, Humic substances, adsorbable organic bromine compounds, and Sirolimus; RNA sequencing and microarray studies indicate that ZK1193.2 is enriched in the intestine and in the I5, DA, SAB, a…
WBGene00018226	F40B5.2	F40B5.2	-0.583477	2.75089e-06	0.667353	Q09320	NP_509417.2, NP_509418.2	Putative metallophosphoesterase F40B5.2 (EC 3.1.-.-)		hydrolase activity [GO:0016787]; metal ion binding [GO:0046872]		N.A.	N.A.	N.A.	excretory cell, GABAergic neuron, intestine, NSM, Psub1	F40B5.2 is an ortholog of human TMPPE (transmembrane protein with metallophosphoesterase domain); F40B5.2 is predicted to have hydrolase activity, based on protein domain information.
WBGene00022154	drag-1	Y71G12B.16	-0.584231	0.00015652	0.667005	G5EDE5	NP_490881.4	RGM domain family member drag-1 (DRG11-responsive axonal guidance and outgrowth of neurite homolog) (DRAGON)	mesodermal cell fate specification [GO:0007501]; positive regulation of multicellular organism growth [GO:0040018]; regulation of BMP signaling pathway [GO:0030510]; regulation of dauer larval development [GO:0061065]; regulation of multicellular organism growth [GO:0040014]; transforming growth factor beta receptor signaling pathway involved in regulation of multicellular organism growth [GO:190…	coreceptor activity [GO:0015026]		N.A.	lethal, small, sterile	hypodermis, intestine, pharynx	N.A.	drag-1 encodes the C. elegans homolog of a putative GPI-anchor protein of the RGM family, a membrane associated protein that functions as co-receptor in the the Sma/Mab pathway; drag-1 mutants exhibit a subset of phenotypes seen in mutants in the Sma/Mab pathway like smaller than wildtype worm phenotype throughout the larval development, the males could mate and have no male tail patterning defec…
WBGene00019068	faah-3	F58H7.2	-0.5851	0.000966597	0.666603	O45089	NP_500017.2	Fatty Acid Amide Hydrolase homolog		amidase activity [GO:0004040]		N.A.	N.A.	N.A.	intestine	faah-3 is an ortholog of human FAAH (fatty acid amide hydrolase); faah-3 is predicted to have amidase activity, based on protein domain information.
WBGene00010339	acl-1	F59F4.4	-0.586531	2.21789e-05	0.665942	Q93841	NP_510606.1	Putative 1-acyl-sn-glycerol-3-phosphate acyltransferase acl-1 (1-AGP acyltransferase) (1-AGPAT) (EC 2.3.1.51) (Lysophosphatidic acid acyltransferase) (LPAAT)	CDP-diacylglycerol biosynthetic process [GO:0016024]	1-acylglycerol-3-phosphate O-acyltransferase activity [GO:0003841]; acylglycerol O-acyltransferase activity [GO:0016411]		N.A.	N.A.	gonad	intestine, muscle cell, OLL, PVD	acl-1 encodes a glycerol-3-phosphate acyltransferase; ACL-1 is predicted to be a membrane protein that plays a role in phospholipid biosynthesis; acl-1 expression decreases gradually throughout aging.
WBGene00013448	Y66D12A.24	Y66D12A.24	-0.58717	7.96182e-05	0.665647	Q95PZ5	NP_499479.2	Uncharacterized protein				N.A.	N.A.	N.A.	intestine	RNA sequencing and microarray studies indicate that Y66D12A.24 is affected by eat-2, csr-1, jmjd-3.1, dpy-21, mir-34, pgl-1, pgl-3, glh-4, glh-1, fog-2, emb-4, sma-2, sma-4, lin-22, lin-54, tdp-1, tbx-2, isp-1, and nuo-6; microarray studies indicate that Y66D12A.24 is affected by Lithium Chloride, Cry5B, and Paraquat; RNA sequencing studies indicate that Y66D12A.24 is enriched in the intestine.
WBGene00009586	F40F9.10	F40F9.10	-0.588218	0.000429519	0.665164	Q20240	NP_505502.2	Uncharacterized protein	tRNA processing [GO:0008033]	transferase activity [GO:0016740]		N.A.	N.A.	anal depressor muscle, body wall musculature, pharynx	muscle cell, pharynx	F40F9.10 is an ortholog of human TRMT12 (tRNA methyltransferase 12); F40F9.10 is expressed in the pharynx, anal depressor muscle, and the body wall musculature.
WBGene00007073	ugt-2	AC3.8	-0.590097	0.000301142	0.664298	Q17404	NP_505672.2	UDP-GlucuronosylTransferase	metabolic process [GO:0008152]	glucuronosyltransferase activity [GO:0015020]		N.A.	N.A.	N.A.	intestine	ugt-2 is an ortholog of human UGT3A2 (UDP glycosyltransferase family 3 member A2) and UGT3A1 (UDP glycosyltransferase family 3 member A1); ugt-2 is predicted to have transferase activity, transferring hexosyl groups, based on protein domain information.
WBGene00008496	F01D5.6	F01D5.6	-0.591454	0.00222074	0.663674	Q9XVA8	NP_496936.1	Uncharacterized protein				N.A.	N.A.	N.A.	germline precursor cell, hypodermis	RNA sequencing and microarray studies indicate that F01D5.6 is affected by Ethanol, Methylmercury hydroxide, 1-methylnicotinamide, D-glucose, Juglone, Zidovudine, Resveratrol, Chlorpyrifos, Quercetin, single-walled carbon nanotubes, Colistin, adsorbable organic bromine compounds, and Sirolimus; tiling array studies indicate that F01D5.6 is enriched in the germline precursor cell and hypodermis.
WBGene00011095	gana-1	R07B7.11	-0.591853	0.000169071	0.66349	Q21801	NP_506031.1	GAlactosidase/N-Acetylgalactosaminidase	glycoside catabolic process [GO:0016139]; glycosylceramide catabolic process [GO:0046477]; oligosaccharide metabolic process [GO:0009311]	alpha-galactosidase activity [GO:0004557]		enzyme activity variant	N.A.	arcade cell, body wall musculature, coelomocyte, hypodermis, intestine, pharynx	body wall musculature, dorsal nerve cord, intestine, lateral nerve cord, muscle cell, nerve ring, pharyngeal muscle cell, pharynx, somatic neuron, tail neuron, ventral nerve cord, vulval muscle	gana-1 encodes a protein with homology to both human alpha-galactosidase (alpha-GAL) and alpha-N-acetylgalactosaminidase (alpha-NAGA) enzymes; these dual enzymatic activities were detected in mixed culture homogenates; immunofluorescence studies show cytoplasmic expression of GANA-1 in body wall muscle and intestinal cells and in coelomocytes. the human gene alpha-galactosidase B (GALB; OMIM:1041…
WBGene00004229	ptr-15	T07H8.6	-0.594071	7.32549e-05	0.662471	O61894	NP_504760.1	PaTched Related family	molting cycle, collagen and cuticulin-based cuticle [GO:0018996]			N.A.	N.A.	N.A.	AFD, Z1, Z4	ptr-15 encodes a nematode-specific member of the sterol sensing domain (SSD) proteins, distantly paralogous to Drosophila PATCHED (PTC) and human PTCH (OMIM:601309, mutated in basal cell nevus syndrome); PTR-15 has no known function in vivo.
WBGene00016283	C31B8.8	C31B8.8	-0.594999	0.000133613	0.662045	G5EBU3	NP_503790.1	Matrix metalloproteinase-C (MMP-C) (MMP-C31) (EC 3.4.24.-) (Zinc metalloprotease 3)		metalloendopeptidase activity [GO:0004222]; metallopeptidase activity [GO:0008237]; zinc ion binding [GO:0008270]		N.A.	N.A.	N.A.	germ line	zmp-3 is an ortholog of human Mmp1 (matrix metallopeptidase 1) and members of the MMP (M10 matrix metallopeptidases) family including MMP13; zmp-3 is predicted to have metalloendopeptidase activity and zinc ion binding activity, based on protein domain information.
WBGene00015122	B0302.5	B0302.5	-0.59506	1.37394e-05	0.662017	Q10928	NP_510785.2	Uncharacterized protein B0302.5				transgene induced cosuppression variant	N.A.	N.A.	intestine	RNA sequencing and microarray studies indicate that B0302.5 is affected by Rotenone, Chlorpyrifos, Diazinon, Humic substances, Paraquat, Colistin, and Sirolimus; tiling array and RNA sequencing studies indicate that B0302.5 is enriched in the intestine.
WBGene00011284	ttr-27	R90.2	-0.595673	0.00380351	0.661736	Q22032	NP_506225.1	TransThyretin-Related family domain				N.A.	N.A.	N.A.	intestine, OLL, PVD	RNA sequencing and microarray studies indicate that ttr-27 is affected by Bisphenol A, Levamisole, Zidovudine, Hydrolyzable Tannins, Colistin, and Allantoin; tiling array and microarray studies indicate that ttr-27 is enriched in the intestine and in the PVD and OLL neurons.
WBGene00008565	F08A8.2	F08A8.2	-0.600963	0.000310798	0.659313	O62137	NP_493262.2	Acyl-coenzyme A oxidase	ascaroside biosynthetic process [GO:1904070]; fatty acid beta-oxidation using acyl-CoA dehydrogenase [GO:0033539]	acyl-CoA dehydrogenase activity [GO:0003995]; acyl-CoA oxidase activity [GO:0003997]; ATP binding [GO:0005524]; FAD binding [GO:0071949]; flavin adenine dinucleotide binding [GO:0050660]		early embryonic lethal, fat associated body size increased, fat content increased, oxygen consumption decreased, pharyngeal pumping reduced, reduced brood size, slow growth	ascaroside biosynthesis defective, ascaroside biosynthesis variant	intestine	intestine, PLM	acox-1.2 is an ortholog of human ACOX1 (acyl-CoA oxidase 1); acox-1.2 is involved in ascaroside biosynthetic process; acox-1.2 is predicted to have FAD binding activity and acyl-CoA oxidase activity, based on protein domain information; acox-1.2 is expressed in the intestine.
WBGene00009331	F32D8.7	F32D8.7	-0.603285	0.000142282	0.658253	A5JYT7	NP_001122937.1, NP_505779.1	Uncharacterized protein		serine-type endopeptidase inhibitor activity [GO:0004867]		N.A.	N.A.	N.A.	AFD, germline precursor cell, hypodermis, pharyngeal muscle cell, PLM, Z1, Z4	F32D8.7 is predicted to have serine-type endopeptidase inhibitor activity, based on protein domain information.
WBGene00007397	C07A4.2	C07A4.2	-0.607163	0.00389461	0.656486	Q93192	NP_509706.2	Uncharacterized protein				N.A.	N.A.	N.A.	hypodermis	C07A4.2 is an ortholog of human PI16 (peptidase inhibitor 16) and members of the GLIPR (GLIPR) family including GLIPR1, CAP family including CRISPLD1, CRISP (Cysteine rich secretory protein) family including CRISP1 and CLEC18 (CAP and C-type lectin domain containing) family including CLEC18A; microarray studies indicate that C07A4.2 is affected by Indole, 4-bromodiphenyl ether, Chlorpyrifos, sing…
WBGene00016760	C49A9.6	C49A9.6	-0.607605	0.000189721	0.656285	O44150	NP_500932.1	Uncharacterized protein				N.A.	N.A.	N.A.	intestine, pharyngeal muscle cell	Microarray, tiling array, and RNA sequencing studies indicate that C49A9.6 is affected by cyc-1, atfs-1, spg-7, rsr-2, emr-1, lem-2, mdt-15, hsf-1, rbr-2, skn-1, mir-34, pgl-1, pgl-3, glh-4, glh-1, alg-2, sma-4, sir-2.1, rrf-1, and tax-6; RNA sequencing and microarray studies indicate that C49A9.6 is affected by D-glucopyranose, Zidovudine, Chlorpyrifos, Humic substances, single-walled carbon nan…
WBGene00020052	R13A5.10	R13A5.10	-0.608239	0.000121918	0.655997	Q95Y87	NP_498663.1	Uncharacterized protein		catalytic activity [GO:0003824]		N.A.	N.A.	excretory cell, head neuron, nervous system	ASER, dopaminergic neuron, hypodermis, neuron	R13A5.10 encodes a cytidine deaminase; by homology the product of R13A5.10 is predicted to function in deamination of cytidine to uracil; large-scale expression studies indicate that R13A5.10 is expressed in larvae and adults and seen in the excretory cell and the nervous system.
WBGene00007704	mdt-21	C24H11.9	-0.60866	0.000865857	0.655805	Q6BER6	NP_001021184.1	Mediator of RNA polymerase II transcription subunit 21 (CeSRB7) (Mediator complex subunit 21)	transcription, DNA-templated [GO:0006351]	RNA polymerase II transcription cofactor activity [GO:0001104]		axon fasciculation variant, axon midline crossing variant, cord commissures fail to reach target, locomotion variant, slow growth, ventral cord patterning variant	N.A.	N.A.	body wall muscle cell, GABAergic neuron, neuron	mdt-21 is an ortholog of human MED21 (mediator complex subunit 21); microarray and RNA sequencing studies indicate that mdt-21 is affected by clk-1, chd-3, emb-4, sma-4, and tdp-1; microarray studies indicate that mdt-21 is affected by Hydrogen sulfide; tiling array and RNA sequencing studies indicate that mdt-21 is enriched in the body wall muscle cell and in neurons including the GABAergic neur…
WBGene00007200	vamp-8	B0513.9	-0.608756	0.00216722	0.655762	Q95QZ1	NP_001040904.1, NP_001040905.1	VAMP (Vesicle Associated Membrane Protein) homolog	vesicle-mediated transport [GO:0016192]			N.A.	N.A.	nervous system, pharynx, tail neuron	ASER, dopaminergic neuron, hermaphrodite-specific	vamp-8 is an ortholog of human VAMP8 (vesicle associated membrane protein 8); vamp-8 is expressed in the pharynx and the nervous system.
WBGene00003402	mpk-2	C04G6.1	-0.610887	1.27245e-05	0.654794	H2KYF8	NP_001021913.1, NP_494947.2, NP_494946.2	Mitogen-activated protein kinase (EC 2.7.11.24)		ATP binding [GO:0005524]; MAP kinase activity [GO:0004707]		N.A.	N.A.	N.A.	AFD, body wall musculature, germline precursor cell, intestine	mpk-2 encodes a mitogen activated protein (MAP) kinase; by homology, MPK-2 is predicted to function as a serine/threonine kinase that acts downstream of a receptor tyrosine kinase in a cell signaling pathway; however, as loss of mpk-2 activity via large-scale RNAi screens does not produce any obvious abnormalities, the precise role of MPK-2 in C. elegans development and/or behavior is not yet kno…
WBGene00007911	C34B7.1	C34B7.1	-0.61133	0.00338416	0.654593	P90769	NP_492264.1	Uncharacterized protein				N.A.	N.A.	N.A.	arcade cell, dopaminergic neuron, pharyngeal-intestinal valve cell, Z1, Z4	The C34B7.1 gene encodes a divergent MYST acetyltransferase that is (apparently) unique to Caenorhabditis; it has no well-characterized orthologs in the complete Drosophila or S. cerevisiae genomes, and no obvious orthologs in the draft human genome sequence either.
WBGene00020047	ttr-32	R13A5.3	-0.612785	0.00035347	0.653933	Q95Y92	NP_498658.1	TransThyretin-Related family domain				hyperactive	N.A.	N.A.	dopaminergic neuron, germline precursor cell, hypodermis, intestine	R13A5.3 encodes a protein containing a predicted signal sequence followed by a transthyretin-like domain; although the product of R13A5.3 belongs to a family of apparently nematode-specific proteins whose function is not yet known, loss of R13A5.3 activity via RNAi has been reported to result in hyperactive locomotion.
WBGene00021895	clec-84	Y54G2A.33	-0.615106	1.3665e-06	0.652882	Q8WTL2	NP_741349.1	C-type LECtin		carbohydrate binding [GO:0030246]		N.A.	N.A.	N.A.	intestine, pharyngeal muscle cell	RNA sequencing and microarray studies indicate that clec-84 is affected by Zidovudine, Chlorpyrifos, Diazinon, and Colistin; tiling array and RNA sequencing studies indicate that clec-84 is enriched in the intestine and pharyngeal muscle cell.
WBGene00003767	nlp-29	B0213.4	-0.615209	0.00133447	0.652835	O44664	NP_504109.1	Neuropeptide-like protein 29 [Cleaved into: QWGYGGY-amide; GYGGYGGY-amide; GMYGGY-amide; GMYGGW-amide]	defense response to bacterium [GO:0042742]; defense response to fungus [GO:0050832]; killing of cells of other organism [GO:0031640]; neuropeptide signaling pathway [GO:0007218]	neuropeptide receptor binding [GO:0071855]		N.A.	N.A.	hyp7 syncytium, hypodermis, intestine	body wall muscle cell, germline precursor cell, hypodermis, intestine, pharyngeal muscle cell, PLM	nlp-29 encodes an antimicrobial, neuropeptide-like protein; nlp-29 appears to play a role in innate immunity, as its expression in the epidermis is strongly induced following fungal infection; nlp-29 expression is also induced following physical injury and osmotic stress; nlp-29 expression following fungal infection or physical wounding is regulated by a TIR-1, (Toll-interleukin 1 receptor (TIR) …
WBGene00002058	ifd-2	F25E2.4	-0.615356	3.87215e-06	0.652769	Q19782	NP_508160.1	Intermediate filament protein ifd-2 (Cel IF D2) (Intermediate filament protein D2) (IF-D2)		structural molecule activity [GO:0005198]		embryonic lethal, growth variant, larval arrest, organism morphology variant, small	N.A.	intestine	ASER, intestine, pharyngeal muscle cell	ifd-2 encodes a nonessential intermediate filament protein; IFD-2 is predicted to function as a structural component of the cytoskeleton; IFD-2 has no obvious function in RNAi assays.
WBGene00020672	T22B7.3	T22B7.3	-0.616352	0.000110674	0.652318	Q23042	NP_508952.2	Uncharacterized protein				N.A.	N.A.	N.A.	AFD, ASER, germline precursor cell, hermaphrodite-specific, hypodermis	Microarray and RNA sequencing studies indicate that T22B7.3 is affected by Heme, Ethanol, Mianserin, D-glucose, Levamisole, Cadmium Chloride, Zidovudine, Fluoranthene, Cry5B, Chlorpyrifos, Diazinon, Humic substances, Copper sulfate, Paraquat, Dafa#1, Sirolimus, and Triclosan; tiling array, RNA sequencing, and microarray studies indicate that T22B7.3 is enriched in the germline precursor cell, hyp…
WBGene00019741	nhr-201	M02H5.3	-0.616854	0.00255525	0.652091	Q966H7	NP_503211.2	Nuclear Hormone Receptor family	transcription, DNA-templated [GO:0006351]	DNA binding transcription factor activity [GO:0003700]; sequence-specific DNA binding [GO:0043565]; zinc ion binding [GO:0008270]		N.A.	N.A.	N.A.	intestine, OLL, PVD	nhr-201 is predicted to have DNA-binding transcription factor activity, sequence-specific DNA binding activity, and zinc ion binding activity, based on protein domain information.
WBGene00044675	fbxa-76	Y119D3B.22	-0.619112	0.00143908	0.651071	Q2WF62	NP_001040879.1	F-box A protein				pattern of transgene expression variant	lethal, sterile	N.A.	intestine, OLL, PVD, Z1, Z4	Tiling array, RNA sequencing, and microarray studies indicate that fbxa-76 is affected by daf-12, hpl-2, emr-1, lem-2, jmjd-3.1, let-418, chd-3, pgl-1, pgl-3, glh-4, glh-1, emb-4, dcr-1, and tdp-1; microarray studies indicate that fbxa-76 is affected by Hydrolyzable Tannins; tiling array and RNA sequencing studies indicate that fbxa-76 is enriched in the Z4, Z1, and intestine and in the PVD and O…
WBGene00004894	sms-3	Y22D7AL.8	-0.62034	5.68004e-07	0.650518	Q965Q4	NP_001317881.1, NP_001317880.1, NP_497425.1, NP_001317882.1, NP_001317879.1	Putative phosphatidylcholine:ceramide cholinephosphotransferase 3 (EC 2.7.8.27) (Sphingomyelin synthase 3)	ceramide biosynthetic process [GO:0046513]; sphingomyelin biosynthetic process [GO:0006686]	ceramide cholinephosphotransferase activity [GO:0047493]; sphingomyelin synthase activity [GO:0033188]		N.A.	N.A.	N.A.	GABAergic neuron, OLL, PVD	sms-3 is an ortholog of human SGMS2 (sphingomyelin synthase 2); microarray, tiling array, and RNA sequencing studies indicate that sms-3 is affected by cyc-1, hpl-2, clk-1, set-2, csr-1, daf-2, let-418, chd-3, mir-34, pgl-1, pgl-3, glh-4, glh-1, sma-2, dcr-1, and ain-1; RNA sequencing and microarray studies indicate that sms-3 is affected by Rotenone, Chlorpyrifos, Diazinon, and Allantoin; tiling…
WBGene00013358	Y60A3A.7	Y60A3A.7	-0.62039	3.08347e-07	0.650495	Q9U1Z6	NP_507863.1	ABHydrolase Domain containing homolog	cellular lipid metabolic process [GO:0044255]	lipase activity [GO:0016298]		N.A.	N.A.	N.A.	ALM, body wall musculature, DA neuron, FLP, I5 neuron, intestine, neuron, PLM, retrovesicular ganglion, SAB, VA neuron	abhd-3.1 is an ortholog of human ABHD1 (abhydrolase domain containing 1) and ABHD3 (abhydrolase domain containing 3); microarray, proteomic, and RNA sequencing studies indicate that abhd-3.1 is affected by cyc-1, atfs-1, spg-7, gld-1, let-7, htz-1, lin-35, mir-34, ain-1, ain-2, slr-2, fbf-1, alg-1, isp-1, and nuo-6; RNA sequencing and microarray studies indicate that abhd-3.1 is affected by Roten…
WBGene00017574	F18F11.1	F18F11.1	-0.623577	7.04762e-07	0.64906	P91262	NP_499907.1	Uncharacterized protein				N.A.	N.A.	head, hypodermis, intestine	intestine	F18F11.1 is an ortholog of human PXMP4 (peroxisomal membrane protein 4); F18F11.1 is expressed in the hypodermis, head, and the intestine.
WBGene00018786	hmbx-1	F54A5.1	-0.626871	4.15623e-08	0.647579	Q9TYT0	NP_490803.1	HMBOX (Mammalian HoMeoBOX gene) homolog	positive regulation of transcription, DNA-templated [GO:0045893]	DNA binding [GO:0003677]		N.A.	N.A.	anal depressor muscle, anal sphincter muscle, body wall musculature, dorsal nerve cord, head muscle, intestine, ventral nerve cord, vulval muscle	intestine, OLL, PVD	hmbx-1 is an ortholog of human HMBOX1 (homeobox containing 1); it belongs to the HNF class of homeobox genes, which encodes an HNF domain and an atypical homeodomain; hmbx-1 is predicted to have DNA binding activity, based on protein domain information; hmbx-1 is expressed in the anal depressor muscle, intestine, anal sphincter muscle, body wall musculature, vulval muscle, ventral nerve cord, and…
WBGene00016069	C24H10.3	C24H10.3	-0.627324	0.00134956	0.647376	Q18133	NP_508861.2	Uncharacterized protein				N.A.	N.A.	N.A.	ASER, gon_male_dtc anterior, gon_male_dtc posterior, hypodermis, PLM, Z1, Z1.p, Z4, Z4.a	Microarray, tiling array, and RNA sequencing studies indicate that C24H10.3 is affected by lin-15B, hpl-2, rsr-2, emr-1, lem-2, bar-1, clk-1, wrn-1, chd-3, dpy-21, mir-34, hrde-1, smg-2, sir-2.1, and ahr-1; RNA sequencing and microarray studies indicate that C24H10.3 is affected by Methylmercury hydroxide, Zidovudine, Colistin, Dafa#1, and Sirolimus; tiling array and RNA sequencing studies indica…
WBGene00015859	C16D9.4	C16D9.4	-0.628248	4.86764e-05	0.646962	Q22898	NP_505124.2	Uncharacterized protein				N.A.	N.A.	N.A.	intestine	Microarray and RNA sequencing studies indicate that C16D9.4 is affected by Aldicarb, Diallyl trisulfide, D-glucopyranose, Progesterone, Atrazine, Cry5B, Hydrolyzable Tannins, Humic substances, Colistin, and Sirolimus; tiling array and RNA sequencing studies indicate that C16D9.4 is enriched in the intestine.
WBGene00021731	Y49G5A.1	Y49G5A.1	-0.629934	0.00172816	0.646206	Q9UAZ2	NP_504413.1	Uncharacterized protein		serine-type endopeptidase inhibitor activity [GO:0004867]		N.A.	N.A.	N.A.	AVA, AVE, cephalic sheath cell, coelomocyte, dopaminergic neuron, hypodermis, OLL, PVD, ray, ventral nerve cord	Y49G5A.1 is predicted to have serine-type endopeptidase inhibitor activity, based on protein domain information.
WBGene00018403	F44A2.3	F44A2.3	-0.629975	3.82158e-06	0.646188	Q20380	NP_505406.4	Uncharacterized protein		lipid binding [GO:0008289]		embryonic lethal, spindle elongation integrity defective early emb	N.A.	AMsoL, AMsoR, Excretory duct, head, hypodermis, vulva	hypodermis	F44A2.3 is an ortholog of members of the human BPIF (BPI fold containing) family including BPI; F44A2.3 is predicted to have lipid binding activity, based on protein domain information; F44A2.3 is expressed in the hypodermis, head, excretory duct, and the vulva.
WBGene00022417	Y102A11A.7	Y102A11A.7	-0.631259	0.00142635	0.645613	Q95XJ8	NP_508376.1	Uncharacterized protein				N.A.	N.A.	N.A.	N.A.	Microarray, tiling array, and RNA sequencing studies indicate that Y102A11A.7 is affected by lin-15B, hpl-2, prg-1, rbr-2, daf-12, daf-16, dpy-21, sma-2, sma-4, lin-22, cox-5B, mir-243, aak-2, tax-6, mir-35, and tbx-2; RNA sequencing and microarray studies indicate that Y102A11A.7 is affected by Methylmercury hydroxide, 1-methylnicotinamide, D-glucose, Atrazine, Colistin, Dafa#1, adsorbable organ…
WBGene00016756	C49A9.2	C49A9.2	-0.631379	0.000251788	0.645559	O44154	NP_500937.1	Uncharacterized protein				N.A.	N.A.	N.A.	intestine	Microarray and RNA sequencing studies indicate that C49A9.2 is affected by Aldicarb, D-glucose, Fluoranthene, Cry5B, Chlorpyrifos, Humic substances, and Sirolimus; RNA sequencing and microarray studies indicate that C49A9.2 is enriched in the intestine.
WBGene00012910	Y46G5A.20	Y46G5A.20	-0.633815	0.000819455	0.64447	Q9U2E9	NP_496724.1	Uncharacterized protein				N.A.	N.A.	N.A.	DA neuron, dopaminergic neuron, I5 neuron, intestine, muscle cell, neuron, OLL, PVD, retrovesicular ganglion, SAB, VA neuron	Microarray and RNA sequencing studies indicate that Y46G5A.20 is affected by Hydrogen sulfide, 1-methylnicotinamide, Cry5B, Quercetin, Humic substances, single-walled carbon nanotubes, Colistin, and Dafa#1; tiling array, RNA sequencing, and microarray studies indicate that Y46G5A.20 is enriched in the intestine and muscle cell and in neurons including dopaminergic, PVD, OLL, I5, DA, SAB, and retr…
WBGene00008548	F07A11.5	F07A11.5	-0.633977	0.000106963	0.644397	Q19133	NP_496483.2	Ribokinase (RK) (EC 2.7.1.15)	carbohydrate phosphorylation [GO:0046835]; D-ribose catabolic process [GO:0019303]	ATP binding [GO:0005524]; carbohydrate kinase activity [GO:0019200]; metal ion binding [GO:0046872]; ribokinase activity [GO:0004747]		N.A.	N.A.	N.A.	germline precursor cell, intestine	F07A11.5 is an ortholog of human RBKS (ribokinase); F07A11.5 is predicted to have ribokinase activity, based on protein domain information.
WBGene00012364	W09D12.1	W09D12.1	-0.635555	9.32626e-05	0.643693	Q23227	NP_506678.2	Zinc MetalloProtease		metalloendopeptidase activity [GO:0004222]; zinc ion binding [GO:0008270]		N.A.	N.A.	N.A.	cephalic sheath cell, dopaminergic neuron, hypodermis, intestine	zmp-4 is an ortholog of human MMP21 (matrix metallopeptidase 21); zmp-4 is predicted to have metalloendopeptidase activity and zinc ion binding activity, based on protein domain information.
[truncated: 465 more rows]

## Sheet: lin-29 OE sig genes (name)
WormBase Gene ID	public name	Sequence Name	log2(FoldChange)	pvalue	fold change	Uniprot ID	RefSeq_protein	Protein names	Gene ontology (biological process)	Gene ontology (molecular function)		RNAi Phenotype Observed	Allele Phenotype Observed	Expr_pattern Tissue	Genomic Study Tissue	Description Text
[truncated: 1,101 more rows]

## Sheet: lin-29 OE sig genes (function)
WormBase Gene ID	public name	Sequence Name	log2(FoldChange)	pvalue	fold change	Uniprot ID	RefSeq_protein	Protein names	Gene ontology (biological process)	Gene ontology (molecular function)		RNAi Phenotype Observed	Allele Phenotype Observed	Expr_pattern Tissue	Genomic Study Tissue	Description Text	.
[truncated: 1,101 more rows]

## Sheet: lin-29 OE 1.7X upreg
WormBase Gene ID	Public Name	Sequence Name	log2(FoldChange)	p value	Fold change	Uniprot ID	RefSeq	Protein name	Gene ontology term	RNAi Phenotype Observed	Allele Phenotype Observed	L4 > L3?	Expr_pattern Tissue	Genomic Study Tissue	Description Text
[truncated: 234 more rows]

[truncated: 4 more sheets: lin-29 OE 1.7X downreg, 25 down-reg lipid metab. genes, 65 lipid metabolism genes, necessary and sufficient genes]
